# Supplementary material for: Chromosomal-level genome assembly of Melastoma candidum provides insights into trichome evolution
Source: Front Plant Sci. 2023 Jan 27;14:1126319. doi: 10.3389/fpls.2023.1126319 (PMC9911893; doi:10.3389/fpls.2023.1126319)
Supplement: Supplementary file 3 [file Table_2.xlsx]

## Sheet: Supplementary Excel file 5 GO e
Supplementary Excel file 2. GO enrichment analysis of significant expanded gene families of MRCA between Melastoma candidum and M. dodecandrum
ONTOLOGY	ID	Description	GeneRatio	BgRatio	pvalue	p.adjust	qvalue	geneID	Count
BP	GO:0010337	regulation of salicylic acid metabolic process	28/1704	45/16975	1.83e-17	3.64e-14	2.62e-14	mc19202/mc19203/mc19204/mc24031/mc24034/mc24035/mc30163/mc37392/mc37393/mc37394/mc37396/mc37399/mc37400/mc37402/mc37403/mc37408/mc37410/mc37435/mc37437/mc37438/mc37439/mc37442/mc37454/mc37485/mc37669/mc37670/mc37680/mc38341	28
BP	GO:0009682	induced systemic resistance	31/1704	62/16975	1.82e-15	1.81e-12	1.3e-12	mc04477/mc07606/mc08820/mc11074/mc12623/mc14616/mc18708/mc21961/mc24131/mc26587/mc26588/mc28511/mc28849/mc30399/mc31039/mc31347/mc31348/mc31349/mc31350/mc31352/mc31354/mc31357/mc31360/mc32625/mc32626/mc32627/mc32628/mc32629/mc32630/mc37009/mc38247	31
BP	GO:0010565	regulation of cellular ketone metabolic process	47/1704	138/16975	1.38e-14	8.74e-12	6.29e-12	mc00784/mc00837/mc01851/mc02113/mc02365/mc03619/mc08471/mc10412/mc12903/mc16659/mc19175/mc19202/mc19203/mc19204/mc20129/mc22259/mc24031/mc24034/mc24035/mc24821/mc30163/mc34383/mc35020/mc35072/mc37392/mc37393/mc37394/mc37396/mc37399/mc37400/mc37402/mc37403/mc37408/mc37410/mc37435/mc37437/mc37438/mc37439/mc37442/mc37454/mc37485/mc37539/mc37669/mc37670/mc37680/mc38341/mc39256	47
BP	GO:0010200	response to chitin	71/1704	271/16975	1.75e-14	8.74e-12	6.29e-12	mc00355/mc00954/mc01729/mc02677/mc02869/mc03646/mc03649/mc03856/mc03970/mc04588/mc04705/mc04845/mc05415/mc07444/mc07702/mc07911/mc08372/mc08693/mc08820/mc08985/mc09744/mc10588/mc11074/mc11117/mc12958/mc15458/mc15685/mc16349/mc17590/mc17912/mc18029/mc18287/mc18896/mc18906/mc20540/mc20948/mc22322/mc23486/mc24064/mc24131/mc24160/mc24356/mc25972/mc26161/mc26489/mc26587/mc26588/mc28332/mc30402/mc31657…	71
BP	GO:0000266	mitochondrial fission	26/1704	49/16975	5.43e-14	2.16e-11	1.56e-11	mc10718/mc17765/mc17809/mc19673/mc23591/mc35851/mc35853/mc35854/mc35856/mc35857/mc35859/mc35861/mc35862/mc35864/mc35869/mc35870/mc35873/mc35874/mc35876/mc35877/mc35880/mc35881/mc35884/mc35886/mc38900/mc40586	26
BP	GO:0009696	salicylic acid metabolic process	28/1704	59/16975	2.25e-13	7.49e-11	5.39e-11	mc19202/mc19203/mc19204/mc24031/mc24034/mc24035/mc30163/mc37392/mc37393/mc37394/mc37396/mc37399/mc37400/mc37402/mc37403/mc37408/mc37410/mc37435/mc37437/mc37438/mc37439/mc37442/mc37454/mc37485/mc37669/mc37670/mc37680/mc38341	28
BP	GO:0009299	mRNA transcription	17/1704	23/16975	5.55e-13	1.58e-10	1.14e-10	mc00363/mc00600/mc03116/mc09205/mc10229/mc12662/mc17441/mc18137/mc21393/mc22001/mc25218/mc30116/mc31191/mc35184/mc38356/mc40141/mc40847	17
BP	GO:0010243	response to organonitrogen compound	100/1704	490/16975	2.77e-12	6.91e-10	4.97e-10	mc00355/mc00739/mc00954/mc01729/mc01785/mc02084/mc02476/mc02677/mc02869/mc03095/mc03646/mc03649/mc03856/mc03970/mc04588/mc04705/mc04845/mc05415/mc07444/mc07702/mc07746/mc07911/mc08372/mc08565/mc08693/mc08820/mc08985/mc09744/mc10588/mc10710/mc11074/mc11117/mc12700/mc12958/mc13644/mc15458/mc15679/mc15685/mc15829/mc16349/mc17590/mc17912/mc18029/mc18287/mc18896/mc18906/mc20024/mc20540/mc20948/mc22043…	100
BP	GO:0018958	phenol-containing compound metabolic process	33/1704	87/16975	3.96e-12	8.77e-10	6.32e-10	mc13522/mc19202/mc19203/mc19204/mc24031/mc24034/mc24035/mc24586/mc29572/mc30163/mc30828/mc33736/mc37392/mc37393/mc37394/mc37396/mc37399/mc37400/mc37402/mc37403/mc37408/mc37410/mc37435/mc37437/mc37438/mc37439/mc37442/mc37454/mc37485/mc37669/mc37670/mc37680/mc38341	33
BP	GO:0010310	regulation of hydrogen peroxide metabolic process	24/1704	50/16975	8.59e-12	1.71e-09	1.23e-09	mc19202/mc19203/mc19204/mc37392/mc37393/mc37394/mc37396/mc37399/mc37400/mc37402/mc37403/mc37408/mc37410/mc37435/mc37437/mc37438/mc37439/mc37442/mc37454/mc37485/mc37669/mc37670/mc37680/mc40586	24
BP	GO:0002576	platelet degranulation	11/1704	11/16975	1.01e-11	1.84e-09	1.32e-09	mc02175/mc12832/mc22186/mc23960/mc26574/mc26891/mc29832/mc30038/mc32297/mc32641/mc38418	11
BP	GO:0042537	benzene-containing compound metabolic process	31/1704	82/16975	1.96e-11	3.26e-09	2.34e-09	mc19202/mc19203/mc19204/mc24031/mc24034/mc24035/mc30163/mc33736/mc34646/mc37392/mc37393/mc37394/mc37396/mc37399/mc37400/mc37402/mc37403/mc37408/mc37410/mc37435/mc37437/mc37438/mc37439/mc37442/mc37454/mc37485/mc37669/mc37670/mc37680/mc38341/mc40762	31
BP	GO:0010433	bract morphogenesis	10/1704	10/16975	1.01e-10	1.44e-08	1.04e-08	mc16158/mc18708/mc19620/mc20373/mc26087/mc28849/mc30399/mc31039/mc32697/mc35488	10
BP	GO:0010434	bract formation	10/1704	10/16975	1.01e-10	1.44e-08	1.04e-08	mc16158/mc18708/mc19620/mc20373/mc26087/mc28849/mc30399/mc31039/mc32697/mc35488	10
BP	GO:0032350	regulation of hormone metabolic process	36/1704	113/16975	1.47e-10	1.95e-08	1.41e-08	mc00784/mc02113/mc05053/mc08125/mc12903/mc19202/mc19203/mc19204/mc22259/mc24031/mc24034/mc24035/mc24821/mc30163/mc35020/mc37392/mc37393/mc37394/mc37396/mc37399/mc37400/mc37402/mc37403/mc37408/mc37410/mc37435/mc37437/mc37438/mc37439/mc37442/mc37454/mc37485/mc37669/mc37670/mc37680/mc38341	36
BP	GO:0042180	cellular ketone metabolic process	48/1704	184/16975	3.61e-10	4.5e-08	3.24e-08	mc00784/mc00837/mc01851/mc02113/mc02365/mc03619/mc08471/mc10412/mc12903/mc16659/mc19175/mc19202/mc19203/mc19204/mc20129/mc22259/mc24031/mc24034/mc24035/mc24821/mc30163/mc34383/mc35020/mc35072/mc37392/mc37393/mc37394/mc37396/mc37399/mc37400/mc37402/mc37403/mc37408/mc37410/mc37435/mc37437/mc37438/mc37439/mc37442/mc37454/mc37485/mc37539/mc37669/mc37670/mc37680/mc38341/mc39256/mc40586	48
BP	GO:0062012	regulation of small molecule metabolic process	47/1704	180/16975	5.32e-10	6.23e-08	4.49e-08	mc00784/mc00837/mc01851/mc02113/mc02365/mc03619/mc08471/mc10412/mc12903/mc16659/mc19175/mc19202/mc19203/mc19204/mc20129/mc22259/mc24031/mc24034/mc24035/mc24821/mc30163/mc34383/mc35020/mc35072/mc37392/mc37393/mc37394/mc37396/mc37399/mc37400/mc37402/mc37403/mc37408/mc37410/mc37435/mc37437/mc37438/mc37439/mc37442/mc37454/mc37485/mc37539/mc37669/mc37670/mc37680/mc38341/mc39256	47
BP	GO:0010929	positive regulation of auxin mediated signaling pathway	18/1704	35/16975	8.37e-10	9.27e-08	6.67e-08	mc00355/mc03646/mc05194/mc06996/mc07444/mc09744/mc12958/mc14729/mc15422/mc18896/mc22322/mc24356/mc25972/mc28997/mc30291/mc33277/mc34095/mc37980	18
BP	GO:0010432	bract development	10/1704	11/16975	1.01e-09	1.06e-07	7.67e-08	mc16158/mc18708/mc19620/mc20373/mc26087/mc28849/mc30399/mc31039/mc32697/mc35488	10
BP	GO:0009864	induced systemic resistance, jasmonic acid mediated signaling pathway	19/1704	43/16975	7.32e-09	7.3e-07	5.26e-07	mc04477/mc07606/mc08820/mc11074/mc18708/mc24131/mc26587/mc26588/mc28849/mc30399/mc31039/mc32625/mc32626/mc32627/mc32628/mc32629/mc32630/mc37009/mc38247	19
BP	GO:0019079	viral genome replication	15/1704	28/16975	1.05e-08	9.99e-07	7.19e-07	mc09996/mc18371/mc20860/mc21102/mc26603/mc27517/mc32608/mc36521/mc36908/mc38990/mc38996/mc39855/mc40683/mc40712/mc40880	15
BP	GO:0009751	response to salicylic acid	69/1704	342/16975	1.14e-08	1.01e-06	7.25e-07	mc00355/mc01386/mc01985/mc02741/mc03569/mc03619/mc03646/mc04729/mc05001/mc05687/mc07029/mc07444/mc07835/mc08068/mc08820/mc08849/mc09662/mc09744/mc11074/mc12623/mc12958/mc13007/mc13022/mc13522/mc14330/mc14688/mc15940/mc17378/mc18896/mc19584/mc20028/mc20030/mc20032/mc20150/mc21961/mc22322/mc22457/mc24112/mc24131/mc24356/mc24684/mc24727/mc25290/mc25890/mc25972/mc26587/mc26588/mc28577/mc29601/mc30852…	69
BP	GO:0009850	auxin metabolic process	29/1704	92/16975	1.16e-08	1.01e-06	7.25e-07	mc00784/mc02113/mc11974/mc12181/mc12903/mc16427/mc16761/mc16992/mc20662/mc22259/mc24821/mc27587/mc28511/mc28518/mc31266/mc31347/mc31348/mc31349/mc31350/mc31352/mc31354/mc31357/mc31360/mc31362/mc34502/mc34508/mc35020/mc39596/mc39949	29
BP	GO:0050832	defense response to fungus	83/1704	443/16975	1.41e-08	1.13e-06	8.16e-07	mc00355/mc02677/mc03054/mc03112/mc03524/mc03646/mc03649/mc04475/mc07444/mc07604/mc08318/mc08693/mc08820/mc09135/mc09198/mc09744/mc09818/mc10280/mc10284/mc10288/mc10289/mc10298/mc10299/mc10412/mc11074/mc11117/mc11219/mc11655/mc12315/mc12958/mc14038/mc14616/mc16349/mc16403/mc16659/mc17321/mc18029/mc18786/mc18896/mc18906/mc19006/mc19175/mc20028/mc20030/mc20032/mc20364/mc20540/mc20624/mc21633/mc21637…	83
BP	GO:0022604	regulation of cell morphogenesis	43/1704	173/16975	1.42e-08	1.13e-06	8.16e-07	mc02476/mc05244/mc05641/mc05960/mc06218/mc06261/mc06453/mc06868/mc06922/mc08565/mc10065/mc11974/mc12078/mc12700/mc13728/mc14182/mc14778/mc14810/mc15196/mc16427/mc16870/mc16992/mc17913/mc19350/mc20662/mc21187/mc22043/mc23262/mc26971/mc27146/mc27451/mc28473/mc28988/mc29665/mc30240/mc30285/mc30787/mc32194/mc35998/mc37084/mc39596/mc39764/mc40586	43
BP	GO:0009683	indoleacetic acid metabolic process	14/1704	25/16975	1.54e-08	1.13e-06	8.16e-07	mc28511/mc28518/mc31266/mc31347/mc31348/mc31349/mc31350/mc31352/mc31354/mc31357/mc31360/mc31362/mc34502/mc34508	14
BP	GO:0009684	indoleacetic acid biosynthetic process	14/1704	25/16975	1.54e-08	1.13e-06	8.16e-07	mc28511/mc28518/mc31266/mc31347/mc31348/mc31349/mc31350/mc31352/mc31354/mc31357/mc31360/mc31362/mc34502/mc34508	14
BP	GO:0002833	positive regulation of response to biotic stimulus	44/1704	180/16975	1.66e-08	1.18e-06	8.52e-07	mc00055/mc01207/mc02609/mc03697/mc04477/mc07606/mc08772/mc08820/mc11074/mc12623/mc16349/mc18029/mc18708/mc20028/mc20030/mc20032/mc20540/mc21961/mc24031/mc24034/mc24035/mc24131/mc25890/mc26269/mc26587/mc26588/mc28342/mc28849/mc30163/mc30399/mc31039/mc31642/mc32625/mc32626/mc32627/mc32628/mc32629/mc32630/mc32889/mc33381/mc36140/mc37009/mc38247/mc38341	44
BP	GO:0019058	viral life cycle	15/1704	29/16975	1.98e-08	1.36e-06	9.79e-07	mc09996/mc18371/mc20860/mc21102/mc26603/mc27517/mc32608/mc36521/mc36908/mc38990/mc38996/mc39855/mc40683/mc40712/mc40880	15
BP	GO:0009862	systemic acquired resistance, salicylic acid mediated signaling pathway	20/1704	50/16975	2.36e-08	1.57e-06	1.13e-06	mc01386/mc02741/mc08820/mc08849/mc11074/mc15940/mc20150/mc24112/mc24131/mc26587/mc26588/mc32625/mc32626/mc32627/mc32628/mc32629/mc32630/mc34011/mc37009/mc38247	20
BP	GO:0010150	leaf senescence	56/1704	261/16975	3.02e-08	1.94e-06	1.4e-06	mc00837/mc01199/mc01577/mc01851/mc04300/mc04729/mc07427/mc07835/mc08801/mc08820/mc09455/mc09732/mc09818/mc10588/mc11074/mc11095/mc11219/mc11857/mc13383/mc13607/mc13669/mc16390/mc17996/mc17997/mc18287/mc19006/mc20028/mc20030/mc20032/mc20588/mc21668/mc22867/mc23161/mc23486/mc24131/mc24147/mc25890/mc26587/mc26588/mc29601/mc30852/mc32625/mc32626/mc32627/mc32628/mc32629/mc32630/mc33381/mc33810/mc34383…	56
BP	GO:0000028	ribosomal small subunit assembly	16/1704	34/16975	3.76e-08	2.3e-06	1.65e-06	mc00236/mc02513/mc04277/mc08597/mc13585/mc13956/mc17655/mc18500/mc21433/mc23090/mc24281/mc24560/mc26864/mc32324/mc35642/mc38080	16
BP	GO:0009863	salicylic acid mediated signaling pathway	37/1704	142/16975	3.8e-08	2.3e-06	1.65e-06	mc00355/mc01386/mc02741/mc03646/mc07444/mc08820/mc08849/mc09744/mc11074/mc12958/mc15940/mc18896/mc20028/mc20030/mc20032/mc20150/mc22322/mc24112/mc24131/mc24356/mc25890/mc25972/mc26587/mc26588/mc32625/mc32626/mc32627/mc32628/mc32629/mc32630/mc33277/mc33381/mc34011/mc34095/mc37009/mc37980/mc38247	37
BP	GO:0032103	positive regulation of response to external stimulus	44/1704	185/16975	3.98e-08	2.33e-06	1.68e-06	mc00055/mc01207/mc02609/mc03697/mc04477/mc07606/mc08772/mc08820/mc11074/mc12623/mc16349/mc18029/mc18708/mc20028/mc20030/mc20032/mc20540/mc21961/mc24031/mc24034/mc24035/mc24131/mc25890/mc26269/mc26587/mc26588/mc28342/mc28849/mc30163/mc30399/mc31039/mc31642/mc32625/mc32626/mc32627/mc32628/mc32629/mc32630/mc32889/mc33381/mc36140/mc37009/mc38247/mc38341	44
BP	GO:1900426	positive regulation of defense response to bacterium	18/1704	43/16975	5.11e-08	2.86e-06	2.06e-06	mc00055/mc01207/mc02609/mc03697/mc08772/mc16349/mc18029/mc20540/mc24031/mc24034/mc24035/mc26269/mc28342/mc30163/mc31642/mc32889/mc36140/mc38341	18
BP	GO:0045664	regulation of neuron differentiation	20/1704	52/16975	5.17e-08	2.86e-06	2.06e-06	mc03749/mc06982/mc09847/mc09922/mc11239/mc12078/mc13728/mc14748/mc16870/mc16993/mc19510/mc23262/mc26971/mc27294/mc27451/mc32194/mc36700/mc39597/mc39764/mc40586	20
BP	GO:0048732	gland development	15/1704	31/16975	6.3e-08	3.4e-06	2.45e-06	mc03749/mc09847/mc09922/mc11239/mc19510/mc23960/mc26565/mc26566/mc26574/mc29832/mc30038/mc32641/mc36700/mc37860/mc38418	15
BP	GO:0045088	regulation of innate immune response	50/1704	227/16975	6.87e-08	3.46e-06	2.49e-06	mc00055/mc01207/mc04477/mc07606/mc08820/mc11074/mc12623/mc16349/mc18029/mc18708/mc20028/mc20030/mc20032/mc20540/mc21961/mc24031/mc24034/mc24035/mc24131/mc25890/mc26269/mc26587/mc26588/mc28342/mc28511/mc28849/mc30163/mc30399/mc31039/mc31347/mc31348/mc31349/mc31350/mc31352/mc31354/mc31357/mc31360/mc31642/mc32625/mc32626/mc32627/mc32628/mc32629/mc32630/mc32889/mc33381/mc36140/mc37009/mc38247/mc38341	50
BP	GO:0005513	detection of calcium ion	10/1704	14/16975	6.94e-08	3.46e-06	2.49e-06	mc04530/mc07649/mc08179/mc15923/mc18107/mc25983/mc28877/mc31016/mc33267/mc39358	10
BP	GO:0046786	viral replication complex formation and maintenance	10/1704	14/16975	6.94e-08	3.46e-06	2.49e-06	mc09996/mc18371/mc20860/mc21102/mc27517/mc36521/mc36908/mc38990/mc38996/mc39855	10
BP	GO:0071446	cellular response to salicylic acid stimulus	37/1704	146/16975	8.31e-08	4.04e-06	2.91e-06	mc00355/mc01386/mc02741/mc03646/mc07444/mc08820/mc08849/mc09744/mc11074/mc12958/mc15940/mc18896/mc20028/mc20030/mc20032/mc20150/mc22322/mc24112/mc24131/mc24356/mc25890/mc25972/mc26587/mc26588/mc32625/mc32626/mc32627/mc32628/mc32629/mc32630/mc33277/mc33381/mc34011/mc34095/mc37009/mc37980/mc38247	37
BP	GO:0090693	plant organ senescence	56/1704	269/16975	8.98e-08	4.26e-06	3.07e-06	mc00837/mc01199/mc01577/mc01851/mc04300/mc04729/mc07427/mc07835/mc08801/mc08820/mc09455/mc09732/mc09818/mc10588/mc11074/mc11095/mc11219/mc11857/mc13383/mc13607/mc13669/mc16390/mc17996/mc17997/mc18287/mc19006/mc20028/mc20030/mc20032/mc20588/mc21668/mc22867/mc23161/mc23486/mc24131/mc24147/mc25890/mc26587/mc26588/mc29601/mc30852/mc32625/mc32626/mc32627/mc32628/mc32629/mc32630/mc33381/mc33810/mc34383…	56
BP	GO:0009627	systemic acquired resistance	37/1704	148/16975	1.21e-07	5.34e-06	3.84e-06	mc01386/mc02741/mc08820/mc08849/mc11074/mc14616/mc15940/mc20150/mc24031/mc24034/mc24035/mc24112/mc24131/mc26587/mc26588/mc28511/mc30163/mc31347/mc31348/mc31349/mc31350/mc31352/mc31354/mc31357/mc31360/mc32625/mc32626/mc32627/mc32628/mc32629/mc32630/mc34011/mc34123/mc34132/mc37009/mc38247/mc38341	37
BP	GO:0110154	RNA decapping	12/1704	21/16975	1.25e-07	5.34e-06	3.84e-06	mc00877/mc01913/mc01914/mc02316/mc12267/mc21573/mc26597/mc27095/mc32610/mc34313/mc35123/mc35124	12
BP	GO:0110156	methylguanosine-cap decapping	12/1704	21/16975	1.25e-07	5.34e-06	3.84e-06	mc00877/mc01913/mc01914/mc02316/mc12267/mc21573/mc26597/mc27095/mc32610/mc34313/mc35123/mc35124	12
BP	GO:0046677	response to antibiotic	86/1704	487/16975	1.26e-07	5.34e-06	3.84e-06	mc00355/mc01110/mc01386/mc01985/mc02476/mc02741/mc03569/mc03619/mc03646/mc04729/mc05001/mc05687/mc07029/mc07444/mc07835/mc08068/mc08565/mc08801/mc08820/mc08849/mc09662/mc09732/mc09744/mc11074/mc11095/mc12623/mc12700/mc12958/mc13007/mc13022/mc13522/mc14330/mc14688/mc15679/mc15940/mc17378/mc18896/mc19584/mc20028/mc20030/mc20032/mc20150/mc21961/mc22043/mc22322/mc22457/mc24112/mc24131/mc24147/mc24356…	86
BP	GO:0031349	positive regulation of defense response	44/1704	192/16975	1.26e-07	5.34e-06	3.84e-06	mc00055/mc01207/mc02609/mc03697/mc04477/mc07606/mc08772/mc08820/mc11074/mc12623/mc16349/mc18029/mc18708/mc20028/mc20030/mc20032/mc20540/mc21961/mc24031/mc24034/mc24035/mc24131/mc25890/mc26269/mc26587/mc26588/mc28342/mc28849/mc30163/mc30399/mc31039/mc31642/mc32625/mc32626/mc32627/mc32628/mc32629/mc32630/mc32889/mc33381/mc36140/mc37009/mc38247/mc38341	44
BP	GO:0050767	regulation of neurogenesis	20/1704	55/16975	1.54e-07	6.4e-06	4.61e-06	mc03749/mc06982/mc09847/mc09922/mc11239/mc12078/mc13728/mc14748/mc16870/mc16993/mc19510/mc23262/mc26971/mc27294/mc27451/mc32194/mc36700/mc39597/mc39764/mc40586	20
BP	GO:0002218	activation of innate immune response	30/1704	108/16975	1.59e-07	6.45e-06	4.65e-06	mc04477/mc07606/mc08820/mc11074/mc12623/mc16349/mc18029/mc18708/mc20028/mc20030/mc20032/mc20540/mc21961/mc24131/mc25890/mc26587/mc26588/mc28849/mc30399/mc31039/mc32625/mc32626/mc32627/mc32628/mc32629/mc32630/mc33381/mc36140/mc37009/mc38247	30
BP	GO:0006569	tryptophan catabolic process	9/1704	12/16975	1.68e-07	6.59e-06	4.74e-06	mc28511/mc31347/mc31348/mc31349/mc31350/mc31352/mc31354/mc31357/mc31360	9
BP	GO:0046218	indolalkylamine catabolic process	9/1704	12/16975	1.68e-07	6.59e-06	4.74e-06	mc28511/mc31347/mc31348/mc31349/mc31350/mc31352/mc31354/mc31357/mc31360	9
BP	GO:0060284	regulation of cell development	36/1704	144/16975	1.79e-07	6.86e-06	4.94e-06	mc03749/mc05244/mc05641/mc05960/mc06261/mc06453/mc06868/mc06982/mc09847/mc09922/mc10065/mc11239/mc12078/mc13728/mc14182/mc14748/mc14810/mc15196/mc16870/mc16993/mc19350/mc19510/mc21187/mc23262/mc26971/mc27294/mc27451/mc28473/mc29665/mc30240/mc32194/mc36700/mc37084/mc39597/mc39764/mc40586	36
BP	GO:0045055	regulated exocytosis	16/1704	38/16975	2.57e-07	9.66e-06	6.96e-06	mc02175/mc02609/mc03697/mc08772/mc11621/mc12832/mc17355/mc22186/mc23960/mc26574/mc26891/mc29832/mc30038/mc32297/mc32641/mc38418	16
BP	GO:0071367	cellular response to brassinosteroid stimulus	27/1704	94/16975	3.12e-07	1.15e-05	8.29e-06	mc00748/mc01682/mc01788/mc02365/mc03126/mc07210/mc08227/mc08471/mc09211/mc14525/mc14942/mc15860/mc16123/mc18556/mc20062/mc20332/mc21111/mc25972/mc29324/mc29361/mc30617/mc33277/mc34461/mc34982/mc35598/mc40277/mc40774	27
BP	GO:0071407	cellular response to organic cyclic compound	66/1704	350/16975	3.34e-07	1.21e-05	8.72e-06	mc00355/mc00748/mc01386/mc01682/mc01788/mc02365/mc02741/mc03126/mc03646/mc07210/mc07444/mc08227/mc08471/mc08820/mc08849/mc09211/mc09744/mc11074/mc12958/mc14525/mc14942/mc15860/mc15940/mc16123/mc18556/mc18896/mc20028/mc20030/mc20032/mc20062/mc20150/mc20332/mc21111/mc22322/mc24112/mc24131/mc24356/mc25890/mc25972/mc26587/mc26588/mc28422/mc28423/mc29324/mc29361/mc30617/mc31552/mc32625/mc32626/mc32627…	66
BP	GO:0045089	positive regulation of innate immune response	36/1704	148/16975	3.7e-07	1.24e-05	8.93e-06	mc00055/mc01207/mc04477/mc07606/mc08820/mc11074/mc12623/mc16349/mc18029/mc18708/mc20028/mc20030/mc20032/mc20540/mc21961/mc24131/mc25890/mc26269/mc26587/mc26588/mc28342/mc28849/mc30399/mc31039/mc31642/mc32625/mc32626/mc32627/mc32628/mc32629/mc32630/mc32889/mc33381/mc36140/mc37009/mc38247	36
BP	GO:0006978	DNA damage response, signal transduction by p53 class mediator resulting in transcription of p21 class mediator	8/1704	10/16975	3.8e-07	1.24e-05	8.93e-06	mc04277/mc13585/mc23090/mc26565/mc26566/mc26864/mc32324/mc37860	8
BP	GO:0010771	negative regulation of cell morphogenesis involved in differentiation	8/1704	10/16975	3.8e-07	1.24e-05	8.93e-06	mc12078/mc13728/mc16870/mc23262/mc26971/mc27451/mc32194/mc39764	8
BP	GO:0033299	secretion of lysosomal enzymes	8/1704	10/16975	3.8e-07	1.24e-05	8.93e-06	mc12473/mc17258/mc21787/mc25206/mc28307/mc31681/mc32902/mc40124	8
BP	GO:0042772	DNA damage response, signal transduction resulting in transcription	8/1704	10/16975	3.8e-07	1.24e-05	8.93e-06	mc04277/mc13585/mc23090/mc26565/mc26566/mc26864/mc32324/mc37860	8
BP	GO:0050771	negative regulation of axonogenesis	8/1704	10/16975	3.8e-07	1.24e-05	8.93e-06	mc12078/mc13728/mc16870/mc23262/mc26971/mc27451/mc32194/mc39764	8
BP	GO:0006568	tryptophan metabolic process	16/1704	39/16975	3.95e-07	1.25e-05	9e-06	mc00784/mc02113/mc12903/mc22259/mc24586/mc24821/mc28511/mc31347/mc31348/mc31349/mc31350/mc31352/mc31354/mc31357/mc31360/mc35020	16
BP	GO:0006586	indolalkylamine metabolic process	16/1704	39/16975	3.95e-07	1.25e-05	9e-06	mc00784/mc02113/mc12903/mc22259/mc24586/mc24821/mc28511/mc31347/mc31348/mc31349/mc31350/mc31352/mc31354/mc31357/mc31360/mc35020	16
BP	GO:0007568	aging	59/1704	302/16975	4.1e-07	1.28e-05	9.19e-06	mc00837/mc01199/mc01577/mc01851/mc04300/mc04729/mc07427/mc07835/mc08801/mc08820/mc09455/mc09732/mc09818/mc10588/mc11074/mc11095/mc11219/mc11857/mc13383/mc13607/mc13669/mc16390/mc17996/mc17997/mc18287/mc19006/mc20028/mc20030/mc20032/mc20588/mc21668/mc22867/mc23161/mc23486/mc24131/mc24147/mc25890/mc26565/mc26566/mc26587/mc26588/mc29601/mc30852/mc32625/mc32626/mc32627/mc32628/mc32629/mc32630/mc33381…	59
BP	GO:0071218	cellular response to misfolded protein	13/1704	27/16975	5.22e-07	1.6e-05	1.15e-05	mc00739/mc01785/mc02084/mc03095/mc07746/mc10710/mc15829/mc20024/mc22305/mc28938/mc30576/mc34960/mc38920	13
BP	GO:0010769	regulation of cell morphogenesis involved in differentiation	25/1704	86/16975	6.6e-07	1.99e-05	1.44e-05	mc05244/mc05641/mc05960/mc06261/mc06453/mc06868/mc10065/mc12078/mc13728/mc14182/mc14810/mc15196/mc16870/mc19350/mc21187/mc23262/mc26971/mc27451/mc28473/mc29665/mc30240/mc32194/mc37084/mc39764/mc40586	25
BP	GO:1900457	regulation of brassinosteroid mediated signaling pathway	14/1704	32/16975	8.23e-07	2.45e-05	1.76e-05	mc02365/mc03126/mc08227/mc08471/mc09211/mc15860/mc16123/mc18556/mc20062/mc20332/mc29361/mc30617/mc35598/mc40277	14
BP	GO:0002253	activation of immune response	30/1704	116/16975	8.55e-07	2.51e-05	1.81e-05	mc04477/mc07606/mc08820/mc11074/mc12623/mc16349/mc18029/mc18708/mc20028/mc20030/mc20032/mc20540/mc21961/mc24131/mc25890/mc26587/mc26588/mc28849/mc30399/mc31039/mc32625/mc32626/mc32627/mc32628/mc32629/mc32630/mc33381/mc36140/mc37009/mc38247	30
BP	GO:0048363	mucilage pectin metabolic process	8/1704	11/16975	1.27e-06	3.56e-05	2.56e-05	mc12373/mc12377/mc21698/mc21701/mc26391/mc26393/mc33021/mc33023	8
BP	GO:0050770	regulation of axonogenesis	8/1704	11/16975	1.27e-06	3.56e-05	2.56e-05	mc12078/mc13728/mc16870/mc23262/mc26971/mc27451/mc32194/mc39764	8
BP	GO:0090313	regulation of protein targeting to membrane	8/1704	11/16975	1.27e-06	3.56e-05	2.56e-05	mc12078/mc13728/mc16870/mc23262/mc26971/mc27451/mc32194/mc39764	8
BP	GO:0052386	cell wall thickening	17/1704	47/16975	1.43e-06	3.9e-05	2.81e-05	mc13041/mc20028/mc20030/mc20032/mc22470/mc24670/mc25890/mc28511/mc31347/mc31348/mc31349/mc31350/mc31352/mc31354/mc31357/mc31360/mc33381	17
BP	GO:0052543	callose deposition in cell wall	17/1704	47/16975	1.43e-06	3.9e-05	2.81e-05	mc13041/mc20028/mc20030/mc20032/mc22470/mc24670/mc25890/mc28511/mc31347/mc31348/mc31349/mc31350/mc31352/mc31354/mc31357/mc31360/mc33381	17
BP	GO:0048354	mucilage biosynthetic process involved in seed coat development	13/1704	29/16975	1.46e-06	3.92e-05	2.82e-05	mc07376/mc09483/mc12373/mc12377/mc17144/mc21698/mc21701/mc25433/mc25964/mc26391/mc26393/mc33021/mc33023	13
BP	GO:0009742	brassinosteroid mediated signaling pathway	25/1704	90/16975	1.67e-06	4.45e-05	3.21e-05	mc00748/mc01682/mc01788/mc02365/mc03126/mc07210/mc08227/mc08471/mc09211/mc14525/mc14942/mc15860/mc16123/mc18556/mc20062/mc20332/mc21111/mc29324/mc29361/mc30617/mc34461/mc34982/mc35598/mc40277/mc40774	25
BP	GO:0022603	regulation of anatomical structure morphogenesis	61/1704	331/16975	2.04e-06	5.34e-05	3.85e-05	mc02476/mc03749/mc05244/mc05641/mc05960/mc06218/mc06261/mc06453/mc06868/mc06922/mc08565/mc09847/mc09922/mc10065/mc10420/mc11239/mc11974/mc12078/mc12700/mc13728/mc13956/mc14182/mc14330/mc14778/mc14810/mc15196/mc16307/mc16427/mc16870/mc16992/mc17913/mc18091/mc18500/mc19350/mc19510/mc20502/mc20662/mc21187/mc22043/mc23262/mc23932/mc26971/mc27146/mc27451/mc28473/mc28988/mc29665/mc29783/mc29987/mc30240…	61
BP	GO:1900056	negative regulation of leaf senescence	13/1704	30/16975	2.33e-06	6.04e-05	4.35e-05	mc08820/mc11074/mc24131/mc26587/mc26588/mc32625/mc32626/mc32627/mc32628/mc32629/mc32630/mc37009/mc38247	13
BP	GO:2000022	regulation of jasmonic acid mediated signaling pathway	20/1704	64/16975	2.47e-06	6.31e-05	4.54e-05	mc00355/mc03646/mc05864/mc06203/mc06968/mc07444/mc09744/mc12958/mc14263/mc14264/mc15414/mc18896/mc22322/mc24356/mc25972/mc28773/mc33277/mc34095/mc37980/mc40930	20
BP	GO:0006121	mitochondrial electron transport, succinate to ubiquinone	9/1704	15/16975	2.89e-06	7.3e-05	5.26e-05	mc00259/mc00267/mc00273/mc00274/mc00277/mc03288/mc03289/mc03408/mc37401	9
BP	GO:0009867	jasmonic acid mediated signaling pathway	45/1704	221/16975	3.02e-06	7.52e-05	5.41e-05	mc00355/mc03646/mc04477/mc05864/mc06203/mc06968/mc07444/mc07606/mc08820/mc09744/mc11074/mc12958/mc14263/mc14264/mc15414/mc16517/mc18708/mc18896/mc22322/mc24131/mc24356/mc25972/mc26489/mc26587/mc26588/mc27305/mc28773/mc28849/mc30399/mc31039/mc32625/mc32626/mc32627/mc32628/mc32629/mc32630/mc33277/mc34095/mc37009/mc37980/mc38247/mc38741/mc39189/mc39610/mc40930	45
BP	GO:1905476	negative regulation of protein localization to membrane	8/1704	12/16975	3.47e-06	8.54e-05	6.15e-05	mc12078/mc13728/mc16870/mc23262/mc26971/mc27451/mc32194/mc39764	8
BP	GO:0009629	response to gravity	32/1704	137/16975	4.11e-06	0.000100048	7.2e-05	mc00430/mc00982/mc01396/mc04418/mc05035/mc05194/mc06140/mc06996/mc07087/mc07542/mc08104/mc13451/mc13978/mc14638/mc14639/mc14729/mc15422/mc22416/mc22940/mc23411/mc23932/mc26739/mc28997/mc29783/mc29987/mc30291/mc32104/mc32453/mc34018/mc34114/mc34875/mc38445	32
BP	GO:0050778	positive regulation of immune response	36/1704	163/16975	4.24e-06	0.000100882	7.26e-05	mc00055/mc01207/mc04477/mc07606/mc08820/mc11074/mc12623/mc16349/mc18029/mc18708/mc20028/mc20030/mc20032/mc20540/mc21961/mc24131/mc25890/mc26269/mc26587/mc26588/mc28342/mc28849/mc30399/mc31039/mc31642/mc32625/mc32626/mc32627/mc32628/mc32629/mc32630/mc32889/mc33381/mc36140/mc37009/mc38247	36
BP	GO:0002682	regulation of immune system process	56/1704	302/16975	4.35e-06	0.000100882	7.26e-05	mc00055/mc01207/mc03749/mc04477/mc07606/mc08820/mc09847/mc09922/mc11074/mc11239/mc12623/mc16349/mc18029/mc18708/mc19510/mc20028/mc20030/mc20032/mc20540/mc21961/mc24031/mc24034/mc24035/mc24131/mc25890/mc26269/mc26587/mc26588/mc28342/mc28511/mc28849/mc30163/mc30399/mc31039/mc31347/mc31348/mc31349/mc31350/mc31352/mc31354/mc31357/mc31360/mc31642/mc32625/mc32626/mc32627/mc32628/mc32629/mc32630/mc32889…	56
BP	GO:0051093	negative regulation of developmental process	56/1704	302/16975	4.35e-06	0.000100882	7.26e-05	mc01985/mc03498/mc03749/mc04863/mc06982/mc07926/mc08820/mc09847/mc09922/mc10001/mc11074/mc11239/mc11677/mc12078/mc13022/mc13728/mc14748/mc16870/mc19510/mc22457/mc23262/mc23975/mc24131/mc24684/mc25289/mc25833/mc25972/mc26565/mc26566/mc26587/mc26588/mc26971/mc27451/mc29313/mc29351/mc29493/mc29853/mc30065/mc30763/mc32194/mc32625/mc32626/mc32627/mc32628/mc32629/mc32630/mc33277/mc33439/mc36700/mc37009…	56
BP	GO:0051961	negative regulation of nervous system development	11/1704	23/16975	4.35e-06	0.000100882	7.26e-05	mc06982/mc12078/mc13728/mc14748/mc16870/mc23262/mc26971/mc27451/mc32194/mc39764/mc40586	11
BP	GO:2000377	regulation of reactive oxygen species metabolic process	28/1704	113/16975	4.84e-06	0.000111031	7.99e-05	mc10718/mc19202/mc19203/mc19204/mc19673/mc23591/mc37392/mc37393/mc37394/mc37396/mc37399/mc37400/mc37402/mc37403/mc37408/mc37410/mc37435/mc37437/mc37438/mc37439/mc37442/mc37454/mc37485/mc37669/mc37670/mc37680/mc38900/mc40586	28
BP	GO:0042255	ribosome assembly	27/1704	107/16975	4.93e-06	0.000111597	8.04e-05	mc00236/mc02513/mc04277/mc08597/mc13585/mc13956/mc17655/mc18500/mc20404/mc21433/mc21597/mc23090/mc24281/mc24560/mc26636/mc26864/mc26941/mc32219/mc32220/mc32221/mc32223/mc32224/mc32226/mc32324/mc32576/mc35642/mc38080	27
BP	GO:0090698	post-embryonic plant morphogenesis	63/1704	355/16975	5.08e-06	0.000113714	8.19e-05	mc00363/mc00430/mc00600/mc01110/mc01396/mc01400/mc01726/mc02226/mc02228/mc03116/mc05044/mc08109/mc09205/mc10229/mc11983/mc12448/mc12662/mc12770/mc16307/mc17441/mc18091/mc18137/mc18708/mc20502/mc21393/mc21766/mc22001/mc22120/mc23932/mc24937/mc25090/mc25214/mc25218/mc25899/mc26299/mc28092/mc28679/mc28849/mc29783/mc29987/mc30116/mc30399/mc31039/mc31191/mc31226/mc31228/mc31242/mc31243/mc32926/mc33365…	63
BP	GO:0035690	cellular response to drug	44/1704	219/16975	5.57e-06	0.000123283	8.88e-05	mc00355/mc01386/mc02741/mc03646/mc07444/mc08820/mc08849/mc09744/mc11074/mc12623/mc12958/mc15940/mc16349/mc18029/mc18896/mc20028/mc20030/mc20032/mc20150/mc20540/mc21961/mc22322/mc24112/mc24131/mc24356/mc25890/mc25972/mc26587/mc26588/mc32625/mc32626/mc32627/mc32628/mc32629/mc32630/mc33277/mc33381/mc34011/mc34095/mc36140/mc37009/mc37980/mc38247/mc40586	44
BP	GO:0060429	epithelium development	29/1704	120/16975	5.63e-06	0.000123283	8.88e-05	mc02323/mc03749/mc06371/mc09847/mc09922/mc10002/mc11239/mc15261/mc16197/mc16517/mc17673/mc19510/mc21106/mc23932/mc23960/mc26565/mc26566/mc26574/mc29783/mc29832/mc29987/mc30038/mc32641/mc35417/mc36700/mc37860/mc38418/mc38445/mc39189	29
BP	GO:0042743	hydrogen peroxide metabolic process	24/1704	90/16975	5.86e-06	0.000127047	9.15e-05	mc19202/mc19203/mc19204/mc37392/mc37393/mc37394/mc37396/mc37399/mc37400/mc37402/mc37403/mc37408/mc37410/mc37435/mc37437/mc37438/mc37439/mc37442/mc37454/mc37485/mc37669/mc37670/mc37680/mc40586	24
BP	GO:0030855	epithelial cell differentiation	19/1704	62/16975	6.05e-06	0.000129759	9.34e-05	mc03749/mc09847/mc09922/mc10002/mc11239/mc16197/mc16517/mc17673/mc19510/mc21106/mc23960/mc26574/mc29832/mc30038/mc32641/mc35417/mc36700/mc38418/mc39189	19
BP	GO:0010582	floral meristem determinacy	14/1704	37/16975	6.58e-06	0.000139546	0.000100481	mc12181/mc16158/mc16761/mc18708/mc19620/mc20373/mc26087/mc27587/mc28849/mc30399/mc31039/mc32697/mc35488/mc39949	14
BP	GO:0009834	plant-type secondary cell wall biogenesis	29/1704	121/16975	6.7e-06	0.000140623	0.000101256	mc00784/mc02113/mc03525/mc04705/mc07808/mc09626/mc10202/mc11654/mc12472/mc12623/mc12903/mc17322/mc19174/mc21313/mc21786/mc21961/mc22259/mc22588/mc24077/mc24554/mc24821/mc26284/mc29621/mc30878/mc32903/mc35020/mc35418/mc37541/mc38299	29
BP	GO:0051960	regulation of nervous system development	20/1704	68/16975	6.98e-06	0.000144891	0.000104329	mc03749/mc06982/mc09847/mc09922/mc11239/mc12078/mc13728/mc14748/mc16870/mc16993/mc19510/mc23262/mc26971/mc27294/mc27451/mc32194/mc36700/mc39597/mc39764/mc40586	20
BP	GO:0007035	vacuolar acidification	11/1704	24/16975	7.3e-06	0.000145723	0.000104928	mc00790/mc01814/mc02118/mc12893/mc13500/mc23000/mc24823/mc29572/mc30828/mc34424/mc35031	11
BP	GO:0051452	intracellular pH reduction	11/1704	24/16975	7.3e-06	0.000145723	0.000104928	mc00790/mc01814/mc02118/mc12893/mc13500/mc23000/mc24823/mc29572/mc30828/mc34424/mc35031	11
BP	GO:0071712	ER-associated misfolded protein catabolic process	11/1704	24/16975	7.3e-06	0.000145723	0.000104928	mc00739/mc01785/mc02084/mc03095/mc07746/mc15829/mc20024/mc22305/mc28938/mc30576/mc34960	11
BP	GO:0051241	negative regulation of multicellular organismal process	52/1704	278/16975	7.31e-06	0.000145723	0.000104928	mc01985/mc03498/mc03749/mc04863/mc06982/mc07926/mc08820/mc09847/mc09922/mc11074/mc11239/mc11677/mc12078/mc13022/mc13728/mc14748/mc16870/mc19510/mc22457/mc23262/mc23975/mc24131/mc24684/mc25289/mc25972/mc26565/mc26566/mc26587/mc26588/mc26971/mc27451/mc29351/mc29493/mc29853/mc30065/mc30763/mc32194/mc32625/mc32626/mc32627/mc32628/mc32629/mc32630/mc33277/mc36700/mc37009/mc37860/mc38247/mc38392/mc39764…	52
BP	GO:0071395	cellular response to jasmonic acid stimulus	45/1704	229/16975	8.02e-06	0.000158379	0.000114042	mc00355/mc03646/mc04477/mc05864/mc06203/mc06968/mc07444/mc07606/mc08820/mc09744/mc11074/mc12958/mc14263/mc14264/mc15414/mc16517/mc18708/mc18896/mc22322/mc24131/mc24356/mc25972/mc26489/mc26587/mc26588/mc27305/mc28773/mc28849/mc30399/mc31039/mc32625/mc32626/mc32627/mc32628/mc32629/mc32630/mc33277/mc34095/mc37009/mc37980/mc38247/mc38741/mc39189/mc39610/mc40930	45
BP	GO:0050776	regulation of immune response	50/1704	265/16975	8.49e-06	0.000165952	0.000119494	mc00055/mc01207/mc04477/mc07606/mc08820/mc11074/mc12623/mc16349/mc18029/mc18708/mc20028/mc20030/mc20032/mc20540/mc21961/mc24031/mc24034/mc24035/mc24131/mc25890/mc26269/mc26587/mc26588/mc28342/mc28511/mc28849/mc30163/mc30399/mc31039/mc31347/mc31348/mc31349/mc31350/mc31352/mc31354/mc31357/mc31360/mc31642/mc32625/mc32626/mc32627/mc32628/mc32629/mc32630/mc32889/mc33381/mc36140/mc37009/mc38247/mc38341	50
BP	GO:0008360	regulation of cell shape	18/1704	58/16975	8.69e-06	0.000168165	0.000121088	mc02476/mc06218/mc06922/mc08565/mc11974/mc12700/mc14778/mc16427/mc16992/mc17913/mc20662/mc22043/mc27146/mc28988/mc30285/mc30787/mc35998/mc39596	18
BP	GO:0042303	molting cycle	7/1704	10/16975	9.27e-06	0.000176246	0.000126907	mc00739/mc01785/mc02084/mc07746/mc22305/mc28938/mc34960	7
BP	GO:0010022	meristem determinacy	14/1704	38/16975	9.46e-06	0.000176246	0.000126907	mc12181/mc16158/mc16761/mc18708/mc19620/mc20373/mc26087/mc27587/mc28849/mc30399/mc31039/mc32697/mc35488/mc39949	14
BP	GO:0052482	defense response by cell wall thickening	14/1704	38/16975	9.46e-06	0.000176246	0.000126907	mc20028/mc20030/mc20032/mc25890/mc28511/mc31347/mc31348/mc31349/mc31350/mc31352/mc31354/mc31357/mc31360/mc33381	14
BP	GO:0052544	defense response by callose deposition in cell wall	14/1704	38/16975	9.46e-06	0.000176246	0.000126907	mc20028/mc20030/mc20032/mc25890/mc28511/mc31347/mc31348/mc31349/mc31350/mc31352/mc31354/mc31357/mc31360/mc33381	14
BP	GO:0071383	cellular response to steroid hormone stimulus	26/1704	105/16975	1.06e-05	0.00019536	0.00014067	mc00748/mc01682/mc01788/mc02365/mc03126/mc07210/mc08227/mc08471/mc09211/mc14525/mc14942/mc15860/mc16123/mc18556/mc20062/mc20332/mc21111/mc29324/mc29361/mc30617/mc34461/mc34982/mc35598/mc40277/mc40586/mc40774	26
BP	GO:0071398	cellular response to fatty acid	45/1704	232/16975	1.14e-05	0.000208101	0.000149844	mc00355/mc03646/mc04477/mc05864/mc06203/mc06968/mc07444/mc07606/mc08820/mc09744/mc11074/mc12958/mc14263/mc14264/mc15414/mc16517/mc18708/mc18896/mc22322/mc24131/mc24356/mc25972/mc26489/mc26587/mc26588/mc27305/mc28773/mc28849/mc30399/mc31039/mc32625/mc32626/mc32627/mc32628/mc32629/mc32630/mc33277/mc34095/mc37009/mc37980/mc38247/mc38741/mc39189/mc39610/mc40930	45
BP	GO:0009832	plant-type cell wall biogenesis	49/1704	261/16975	1.2e-05	0.000216968	0.000156229	mc00784/mc02059/mc02113/mc03525/mc03877/mc04705/mc05203/mc05435/mc07163/mc07808/mc09626/mc10202/mc11386/mc11654/mc12373/mc12377/mc12472/mc12623/mc12903/mc12979/mc17322/mc17565/mc19174/mc21313/mc21698/mc21701/mc21786/mc21961/mc22259/mc22350/mc22588/mc24077/mc24554/mc24762/mc24821/mc26284/mc26391/mc26393/mc28976/mc29621/mc30277/mc30878/mc32903/mc33021/mc33023/mc35020/mc35418/mc37541/mc38299	49
BP	GO:0051788	response to misfolded protein	13/1704	34/16975	1.23e-05	0.000221	0.000159132	mc00739/mc01785/mc02084/mc03095/mc07746/mc10710/mc15829/mc20024/mc22305/mc28938/mc30576/mc34960/mc38920	13
BP	GO:0048545	response to steroid hormone	26/1704	106/16975	1.27e-05	0.000226078	0.000162789	mc00748/mc01682/mc01788/mc02365/mc03126/mc07210/mc08227/mc08471/mc09211/mc14525/mc14942/mc15860/mc16123/mc18556/mc20062/mc20332/mc21111/mc29324/mc29361/mc30617/mc34461/mc34982/mc35598/mc40277/mc40586/mc40774	26
BP	GO:0010099	regulation of photomorphogenesis	16/1704	49/16975	1.33e-05	0.000233836	0.000168375	mc04530/mc06140/mc07087/mc07649/mc08179/mc13978/mc14638/mc14639/mc15923/mc16708/mc25983/mc27663/mc28877/mc31016/mc33267/mc39347	16
BP	GO:0010975	regulation of neuron projection development	14/1704	39/16975	1.34e-05	0.000234333	0.000168733	mc06982/mc12078/mc13728/mc14748/mc16870/mc16993/mc23262/mc26971/mc27294/mc27451/mc32194/mc39597/mc39764/mc40586	14
BP	GO:0007186	G protein-coupled receptor signaling pathway	17/1704	55/16975	1.63e-05	0.000282828	0.000203652	mc00877/mc01913/mc01914/mc23960/mc25196/mc26321/mc26322/mc26574/mc29832/mc30038/mc31730/mc32641/mc32957/mc34313/mc35123/mc35124/mc38418	17
BP	GO:0002684	positive regulation of immune system process	36/1704	173/16975	1.73e-05	0.00029756	0.000214259	mc00055/mc01207/mc04477/mc07606/mc08820/mc11074/mc12623/mc16349/mc18029/mc18708/mc20028/mc20030/mc20032/mc20540/mc21961/mc24131/mc25890/mc26269/mc26587/mc26588/mc28342/mc28849/mc30399/mc31039/mc31642/mc32625/mc32626/mc32627/mc32628/mc32629/mc32630/mc32889/mc33381/mc36140/mc37009/mc38247	36
BP	GO:1905622	negative regulation of leaf development	13/1704	35/16975	1.78e-05	0.00030303	0.000218199	mc08820/mc11074/mc24131/mc26587/mc26588/mc32625/mc32626/mc32627/mc32628/mc32629/mc32630/mc37009/mc38247	13
BP	GO:0045851	pH reduction	11/1704	26/16975	1.87e-05	0.000315938	0.000227492	mc00790/mc01814/mc02118/mc12893/mc13500/mc23000/mc24823/mc29572/mc30828/mc34424/mc35031	11
BP	GO:0009310	amine catabolic process	9/1704	18/16975	2.12e-05	0.000349683	0.000251791	mc28511/mc31347/mc31348/mc31349/mc31350/mc31352/mc31354/mc31357/mc31360	9
BP	GO:0042402	cellular biogenic amine catabolic process	9/1704	18/16975	2.12e-05	0.000349683	0.000251791	mc28511/mc31347/mc31348/mc31349/mc31350/mc31352/mc31354/mc31357/mc31360	9
BP	GO:0042436	indole-containing compound catabolic process	9/1704	18/16975	2.12e-05	0.000349683	0.000251791	mc28511/mc31347/mc31348/mc31349/mc31350/mc31352/mc31354/mc31357/mc31360	9
BP	GO:0070726	cell wall assembly	12/1704	31/16975	2.3e-05	0.000372906	0.000268513	mc02059/mc12373/mc12377/mc12979/mc21698/mc21701/mc22350/mc24762/mc26391/mc26393/mc33021/mc33023	12
BP	GO:0071668	plant-type cell wall assembly	12/1704	31/16975	2.3e-05	0.000372906	0.000268513	mc02059/mc12373/mc12377/mc12979/mc21698/mc21701/mc22350/mc24762/mc26391/mc26393/mc33021/mc33023	12
BP	GO:0010446	response to alkaline pH	7/1704	11/16975	2.33e-05	0.000374023	0.000269317	mc05864/mc06203/mc06968/mc14264/mc15414/mc28773/mc40930	7
BP	GO:0043401	steroid hormone mediated signaling pathway	25/1704	104/16975	2.68e-05	0.000427352	0.000307717	mc00748/mc01682/mc01788/mc02365/mc03126/mc07210/mc08227/mc08471/mc09211/mc14525/mc14942/mc15860/mc16123/mc18556/mc20062/mc20332/mc21111/mc29324/mc29361/mc30617/mc34461/mc34982/mc35598/mc40277/mc40774	25
BP	GO:0002252	immune effector process	34/1704	163/16975	2.78e-05	0.000440343	0.000317071	mc04477/mc05051/mc07606/mc08820/mc11074/mc12623/mc18708/mc21961/mc22857/mc23960/mc24131/mc26574/mc26587/mc26588/mc28422/mc28423/mc28849/mc29027/mc29832/mc30038/mc30315/mc30399/mc31039/mc31552/mc32625/mc32626/mc32627/mc32628/mc32629/mc32630/mc32641/mc37009/mc38247/mc38418	34
BP	GO:0071365	cellular response to auxin stimulus	53/1704	299/16975	2.87e-05	0.000451065	0.000324792	mc00100/mc00355/mc00784/mc00877/mc01913/mc01914/mc01985/mc02011/mc02113/mc02980/mc03646/mc05065/mc05194/mc06996/mc07347/mc07444/mc09744/mc12903/mc12958/mc13022/mc13041/mc13296/mc14729/mc15422/mc18896/mc22259/mc22322/mc22417/mc22457/mc22470/mc22775/mc23221/mc24356/mc24464/mc24670/mc24684/mc24714/mc24821/mc25972/mc28536/mc28997/mc30291/mc30322/mc30481/mc31368/mc32217/mc33277/mc34095/mc34313/mc35020…	53
BP	GO:0009630	gravitropism	28/1704	124/16975	3.12e-05	0.000485927	0.000349894	mc00430/mc00982/mc01396/mc04418/mc05035/mc05194/mc06140/mc06996/mc07087/mc07542/mc08104/mc13978/mc14638/mc14639/mc14729/mc15422/mc22416/mc23411/mc23932/mc28997/mc29783/mc29987/mc30291/mc32104/mc34018/mc34114/mc34875/mc38445	28
BP	GO:0042771	intrinsic apoptotic signaling pathway in response to DNA damage by p53 class mediator	8/1704	15/16975	3.42e-05	0.000524042	0.000377339	mc04277/mc13585/mc23090/mc26565/mc26566/mc26864/mc32324/mc37860	8
BP	GO:1900458	negative regulation of brassinosteroid mediated signaling pathway	8/1704	15/16975	3.42e-05	0.000524042	0.000377339	mc02365/mc03126/mc08471/mc09211/mc15860/mc20062/mc29361/mc30617	8
BP	GO:0071669	plant-type cell wall organization or biogenesis	66/1704	400/16975	3.48e-05	0.00052959	0.000381334	mc00784/mc00958/mc01724/mc02059/mc02113/mc02226/mc02228/mc02420/mc03525/mc03877/mc04705/mc05203/mc05435/mc07163/mc07808/mc08507/mc09626/mc10202/mc11386/mc11654/mc12373/mc12377/mc12472/mc12623/mc12770/mc12903/mc12979/mc17322/mc17565/mc19174/mc19446/mc19559/mc21092/mc21313/mc21698/mc21701/mc21786/mc21961/mc22120/mc22259/mc22350/mc22588/mc23238/mc24077/mc24554/mc24762/mc24821/mc24937/mc26284/mc26391…	66
BP	GO:0010112	regulation of systemic acquired resistance	14/1704	42/16975	3.52e-05	0.00053118	0.000382479	mc24031/mc24034/mc24035/mc28511/mc30163/mc31347/mc31348/mc31349/mc31350/mc31352/mc31354/mc31357/mc31360/mc38341	14
BP	GO:0006576	cellular biogenic amine metabolic process	20/1704	76/16975	4.23e-05	0.00063364	0.000456255	mc00784/mc02113/mc07197/mc12903/mc14521/mc16280/mc20472/mc22259/mc24586/mc24821/mc28511/mc31347/mc31348/mc31349/mc31350/mc31352/mc31354/mc31357/mc31360/mc35020	20
BP	GO:0051592	response to calcium ion	15/1704	48/16975	4.41e-05	0.000655876	0.000472267	mc04530/mc07649/mc08179/mc12078/mc15923/mc16870/mc18107/mc25983/mc27451/mc28877/mc31016/mc33267/mc39358/mc39764/mc40586	15
BP	GO:0010311	lateral root formation	22/1704	89/16975	5.08e-05	0.000747259	0.000538067	mc00430/mc01110/mc01396/mc01400/mc23932/mc25090/mc25214/mc28092/mc28679/mc29783/mc29987/mc31226/mc31228/mc31242/mc31243/mc33732/mc34018/mc34022/mc34114/mc34643/mc38445/mc39361	22
BP	GO:0031539	positive regulation of anthocyanin metabolic process	7/1704	12/16975	5.1e-05	0.000747259	0.000538067	mc06140/mc07087/mc13978/mc14638/mc14639/mc16517/mc39189	7
BP	GO:0048666	neuron development	20/1704	77/16975	5.18e-05	0.000753494	0.000542557	mc03749/mc06982/mc09847/mc09922/mc11239/mc12078/mc13728/mc14748/mc16870/mc16993/mc19510/mc23262/mc26971/mc27294/mc27451/mc32194/mc36700/mc39597/mc39764/mc40586	20
BP	GO:0070542	response to fatty acid	67/1704	413/16975	5.22e-05	0.000754493	0.000543277	mc00355/mc03569/mc03646/mc04477/mc04729/mc05001/mc05687/mc05864/mc06203/mc06968/mc07444/mc07606/mc07835/mc08068/mc08820/mc09662/mc09744/mc11074/mc12623/mc12958/mc13522/mc14263/mc14264/mc15414/mc16517/mc17378/mc17912/mc18708/mc18896/mc19584/mc21961/mc22322/mc24131/mc24356/mc25290/mc25972/mc26489/mc26587/mc26588/mc27305/mc28773/mc28849/mc29601/mc30399/mc30852/mc31039/mc32625/mc32626/mc32627/mc32628…	67
BP	GO:0050768	negative regulation of neurogenesis	9/1704	20/16975	6.08e-05	0.000866383	0.000623843	mc12078/mc13728/mc16870/mc23262/mc26971/mc27451/mc32194/mc39764/mc40586	9
BP	GO:0090596	sensory organ morphogenesis	9/1704	20/16975	6.08e-05	0.000866383	0.000623843	mc03749/mc06371/mc09847/mc09922/mc11239/mc15261/mc19510/mc36700/mc40586	9
BP	GO:0055002	striated muscle cell development	8/1704	16/16975	6.23e-05	0.000867554	0.000624687	mc00739/mc01785/mc02084/mc07746/mc22305/mc28938/mc34960/mc40586	8
BP	GO:0071555	cell wall organization	50/1704	285/16975	6.28e-05	0.000867554	0.000624687	mc02059/mc02226/mc02228/mc02420/mc08507/mc09065/mc12373/mc12377/mc12770/mc12979/mc13041/mc17817/mc19131/mc19446/mc19559/mc20028/mc20030/mc20032/mc21092/mc21698/mc21701/mc22120/mc22350/mc22470/mc23238/mc24670/mc24762/mc24937/mc25890/mc26391/mc26393/mc26957/mc28511/mc29267/mc30506/mc31347/mc31348/mc31349/mc31350/mc31352/mc31354/mc31357/mc31360/mc32207/mc33021/mc33023/mc33381/mc35653/mc36074/mc36870	50
BP	GO:0010623	programmed cell death involved in cell development	14/1704	44/16975	6.31e-05	0.000867554	0.000624687	mc03054/mc03112/mc09135/mc09198/mc10280/mc10284/mc10288/mc10289/mc10298/mc10299/mc27597/mc28887/mc30607/mc39969	14
BP	GO:0080112	seed growth	14/1704	44/16975	6.31e-05	0.000867554	0.000624687	mc05194/mc06996/mc14729/mc15422/mc16390/mc17996/mc17997/mc20588/mc21668/mc25972/mc28997/mc30291/mc33277/mc36066	14
BP	GO:0080113	regulation of seed growth	14/1704	44/16975	6.31e-05	0.000867554	0.000624687	mc05194/mc06996/mc14729/mc15422/mc16390/mc17996/mc17997/mc20588/mc21668/mc25972/mc28997/mc30291/mc33277/mc36066	14
BP	GO:0032940	secretion by cell	41/1704	219/16975	6.38e-05	0.000871349	0.000627419	mc02175/mc02609/mc03364/mc03697/mc04562/mc07681/mc08772/mc09454/mc11192/mc11621/mc11861/mc12473/mc12832/mc13601/mc17258/mc17355/mc21787/mc22186/mc22279/mc23108/mc23960/mc24530/mc24531/mc24532/mc25206/mc26574/mc26891/mc28307/mc28340/mc28895/mc29832/mc30038/mc30982/mc31646/mc31681/mc32297/mc32641/mc32902/mc38418/mc40124/mc40586	41
BP	GO:0002831	regulation of response to biotic stimulus	53/1704	308/16975	6.53e-05	0.000885619	0.000637694	mc00055/mc01207/mc02609/mc03697/mc04477/mc07606/mc08772/mc08820/mc11074/mc12623/mc16349/mc18029/mc18708/mc20028/mc20030/mc20032/mc20540/mc21961/mc24031/mc24034/mc24035/mc24131/mc25890/mc26269/mc26587/mc26588/mc28342/mc28511/mc28849/mc30163/mc30399/mc31039/mc31347/mc31348/mc31349/mc31350/mc31352/mc31354/mc31357/mc31360/mc31642/mc32625/mc32626/mc32627/mc32628/mc32629/mc32630/mc32889/mc33381/mc36140…	53
BP	GO:0009753	response to jasmonic acid	66/1704	409/16975	6.97e-05	0.000938065	0.000675458	mc00355/mc03569/mc03646/mc04477/mc04729/mc05001/mc05687/mc05864/mc06203/mc06968/mc07444/mc07606/mc07835/mc08068/mc08820/mc09662/mc09744/mc11074/mc12623/mc12958/mc13522/mc14263/mc14264/mc15414/mc16517/mc17378/mc17912/mc18708/mc18896/mc19584/mc21961/mc22322/mc24131/mc24356/mc25290/mc25972/mc26489/mc26587/mc26588/mc27305/mc28773/mc28849/mc29601/mc30399/mc30852/mc31039/mc32625/mc32626/mc32627/mc32628…	66
BP	GO:0042546	cell wall biogenesis	55/1704	324/16975	7.01e-05	0.000938065	0.000675458	mc00784/mc02059/mc02113/mc03525/mc03877/mc03969/mc04705/mc05203/mc05435/mc07163/mc07808/mc08382/mc09626/mc09746/mc09747/mc10202/mc11110/mc11386/mc11654/mc12373/mc12377/mc12472/mc12623/mc12903/mc12979/mc17322/mc17565/mc18899/mc19174/mc21313/mc21698/mc21701/mc21786/mc21961/mc22259/mc22350/mc22588/mc24077/mc24554/mc24762/mc24821/mc26284/mc26391/mc26393/mc28976/mc29621/mc30277/mc30878/mc32903/mc33021…	55
BP	GO:0052545	callose localization	17/1704	62/16975	8.95e-05	0.00118995	0.000856829	mc13041/mc20028/mc20030/mc20032/mc22470/mc24670/mc25890/mc28511/mc31347/mc31348/mc31349/mc31350/mc31352/mc31354/mc31357/mc31360/mc33381	17
BP	GO:0045596	negative regulation of cell differentiation	19/1704	74/16975	9.36e-05	0.00123661	0.000890428	mc03749/mc09847/mc09922/mc10001/mc11239/mc12078/mc13728/mc16870/mc19510/mc23262/mc25833/mc26971/mc27451/mc29313/mc32194/mc33439/mc36700/mc39764/mc40586	19
BP	GO:0008630	intrinsic apoptotic signaling pathway in response to DNA damage	8/1704	17/16975	0.000107344	0.00139899	0.00100735	mc04277/mc13585/mc23090/mc26565/mc26566/mc26864/mc32324/mc37860	8
BP	GO:0055001	muscle cell development	8/1704	17/16975	0.000107344	0.00139899	0.00100735	mc00739/mc01785/mc02084/mc07746/mc22305/mc28938/mc34960/mc40586	8
BP	GO:0052542	defense response by callose deposition	14/1704	46/16975	0.00010863	0.00140655	0.00101279	mc20028/mc20030/mc20032/mc25890/mc28511/mc31347/mc31348/mc31349/mc31350/mc31352/mc31354/mc31357/mc31360/mc33381	14
BP	GO:0009688	abscisic acid biosynthetic process	13/1704	41/16975	0.000119462	0.00151725	0.0010925	mc00837/mc01851/mc02313/mc10412/mc12642/mc16659/mc19175/mc21977/mc27099/mc34383/mc35072/mc37539/mc39256	13
BP	GO:0043289	apocarotenoid biosynthetic process	13/1704	41/16975	0.000119462	0.00151725	0.0010925	mc00837/mc01851/mc02313/mc10412/mc12642/mc16659/mc19175/mc21977/mc27099/mc34383/mc35072/mc37539/mc39256	13
BP	GO:1902645	tertiary alcohol biosynthetic process	13/1704	41/16975	0.000119462	0.00151725	0.0010925	mc00837/mc01851/mc02313/mc10412/mc12642/mc16659/mc19175/mc21977/mc27099/mc34383/mc35072/mc37539/mc39256	13
BP	GO:0033037	polysaccharide localization	17/1704	64/16975	0.000137501	0.00173529	0.00124951	mc13041/mc20028/mc20030/mc20032/mc22470/mc24670/mc25890/mc28511/mc31347/mc31348/mc31349/mc31350/mc31352/mc31354/mc31357/mc31360/mc33381	17
BP	GO:1900424	regulation of defense response to bacterium	18/1704	70/16975	0.000139028	0.00174354	0.00125544	mc00055/mc01207/mc02609/mc03697/mc08772/mc16349/mc18029/mc20540/mc24031/mc24034/mc24035/mc26269/mc28342/mc30163/mc31642/mc32889/mc36140/mc38341	18
BP	GO:0006450	regulation of translational fidelity	6/1704	10/16975	0.000149083	0.00179648	0.00129357	mc00193/mc01498/mc22549/mc24527/mc32809/mc34785	6
BP	GO:0007423	sensory organ development	9/1704	22/16975	0.000149557	0.00179648	0.00129357	mc03749/mc06371/mc09847/mc09922/mc11239/mc15261/mc19510/mc36700/mc40586	9
BP	GO:0009074	aromatic amino acid family catabolic process	9/1704	22/16975	0.000149557	0.00179648	0.00129357	mc28511/mc31347/mc31348/mc31349/mc31350/mc31352/mc31354/mc31357/mc31360	9
BP	GO:0010115	regulation of abscisic acid biosynthetic process	9/1704	22/16975	0.000149557	0.00179648	0.00129357	mc00837/mc01851/mc10412/mc16659/mc19175/mc34383/mc35072/mc37539/mc39256	9
BP	GO:0010721	negative regulation of cell development	9/1704	22/16975	0.000149557	0.00179648	0.00129357	mc12078/mc13728/mc16870/mc23262/mc26971/mc27451/mc32194/mc39764/mc40586	9
BP	GO:0035107	appendage morphogenesis	9/1704	22/16975	0.000149557	0.00179648	0.00129357	mc02323/mc03749/mc06371/mc09847/mc09922/mc11239/mc15261/mc19510/mc36700	9
BP	GO:0048736	appendage development	9/1704	22/16975	0.000149557	0.00179648	0.00129357	mc02323/mc03749/mc06371/mc09847/mc09922/mc11239/mc15261/mc19510/mc36700	9
BP	GO:0006817	phosphate ion transport	13/1704	42/16975	0.000157252	0.0018776	0.00135198	mc00096/mc01005/mc01691/mc13142/mc18126/mc21401/mc22624/mc24461/mc24592/mc26161/mc32766/mc34570/mc39605	13
BP	GO:0009880	embryonic pattern specification	16/1704	59/16975	0.000164824	0.0019563	0.00140864	mc01885/mc03854/mc05228/mc05411/mc11356/mc17593/mc25162/mc25163/mc29498/mc30774/mc34347/mc35136/mc35138/mc35139/mc35141/mc35143	16
BP	GO:0009723	response to ethylene	56/1704	343/16975	0.000175847	0.00203621	0.00146619	mc00355/mc02119/mc02138/mc03095/mc03569/mc03646/mc03746/mc05065/mc07347/mc07444/mc09662/mc09744/mc09844/mc10046/mc11192/mc11233/mc12174/mc12623/mc12891/mc12958/mc13899/mc14624/mc15829/mc16390/mc16767/mc17378/mc17912/mc17996/mc17997/mc18896/mc20024/mc20588/mc21168/mc21668/mc21961/mc22246/mc22322/mc24356/mc24825/mc24833/mc25972/mc26489/mc27305/mc27574/mc27582/mc30322/mc30576/mc33120/mc33277/mc34095…	56
BP	GO:0072332	intrinsic apoptotic signaling pathway by p53 class mediator	8/1704	18/16975	0.000176244	0.00203621	0.00146619	mc04277/mc13585/mc23090/mc26565/mc26566/mc26864/mc32324/mc37860	8
BP	GO:1903533	regulation of protein targeting	8/1704	18/16975	0.000176244	0.00203621	0.00146619	mc12078/mc13728/mc16870/mc23262/mc26971/mc27451/mc32194/mc39764	8
BP	GO:1905475	regulation of protein localization to membrane	8/1704	18/16975	0.000176244	0.00203621	0.00146619	mc12078/mc13728/mc16870/mc23262/mc26971/mc27451/mc32194/mc39764	8
BP	GO:0140352	export from cell	41/1704	229/16975	0.000176662	0.00203621	0.00146619	mc02175/mc02609/mc03364/mc03697/mc04562/mc07681/mc08772/mc09454/mc11192/mc11621/mc11861/mc12473/mc12832/mc13601/mc17258/mc17355/mc21787/mc22186/mc22279/mc23108/mc23960/mc24530/mc24531/mc24532/mc25206/mc26574/mc26891/mc28307/mc28340/mc28895/mc29832/mc30038/mc30982/mc31646/mc31681/mc32297/mc32641/mc32902/mc38418/mc40124/mc40586	41
BP	GO:0035082	axoneme assembly	7/1704	14/16975	0.000184189	0.00211076	0.00151986	mc03104/mc09185/mc12178/mc16764/mc16765/mc27584/mc39946	7
BP	GO:0010102	lateral root morphogenesis	24/1704	110/16975	0.000196052	0.00223387	0.00160851	mc00430/mc01110/mc01396/mc01400/mc23932/mc25090/mc25214/mc25899/mc28092/mc28679/mc29783/mc29987/mc31226/mc31228/mc31242/mc31243/mc33365/mc33732/mc34018/mc34022/mc34114/mc34643/mc38445/mc39361	24
BP	GO:0048532	anatomical structure arrangement	33/1704	172/16975	0.00019789	0.002242	0.00161436	mc00748/mc00877/mc01788/mc01913/mc01914/mc03854/mc05411/mc11356/mc13956/mc16307/mc17593/mc17822/mc18091/mc18500/mc20502/mc20734/mc25162/mc25163/mc25972/mc33277/mc34313/mc34461/mc34982/mc35123/mc35124/mc35901/mc36177/mc36232/mc36418/mc36430/mc36431/mc36432/mc36495	33
BP	GO:0030641	regulation of cellular pH	15/1704	55/16975	0.000244345	0.00273721	0.00197094	mc00790/mc01814/mc02118/mc05283/mc05285/mc05598/mc12893/mc13500/mc14644/mc23000/mc24823/mc29572/mc30828/mc34424/mc35031	15
BP	GO:0051453	regulation of intracellular pH	15/1704	55/16975	0.000244345	0.00273721	0.00197094	mc00790/mc01814/mc02118/mc05283/mc05285/mc05598/mc12893/mc13500/mc14644/mc23000/mc24823/mc29572/mc30828/mc34424/mc35031	15
BP	GO:0048527	lateral root development	37/1704	203/16975	0.000248217	0.00276506	0.00199099	mc00100/mc00430/mc01110/mc01396/mc01400/mc01985/mc10412/mc13022/mc13296/mc16659/mc19175/mc22457/mc22775/mc23932/mc24464/mc24684/mc25090/mc25214/mc25899/mc28092/mc28679/mc29783/mc29987/mc31226/mc31228/mc31242/mc31243/mc33365/mc33732/mc34018/mc34022/mc34114/mc34643/mc37539/mc38445/mc39256/mc39361	37
BP	GO:0046903	secretion	41/1704	233/16975	0.000258511	0.00286373	0.00206204	mc02175/mc02609/mc03364/mc03697/mc04562/mc07681/mc08772/mc09454/mc11192/mc11621/mc11861/mc12473/mc12832/mc13601/mc17258/mc17355/mc21787/mc22186/mc22279/mc23108/mc23960/mc24530/mc24531/mc24532/mc25206/mc26574/mc26891/mc28307/mc28340/mc28895/mc29832/mc30038/mc30982/mc31646/mc31681/mc32297/mc32641/mc32902/mc38418/mc40124/mc40586	41
BP	GO:0010101	post-embryonic root morphogenesis	24/1704	112/16975	0.000261556	0.00288145	0.0020748	mc00430/mc01110/mc01396/mc01400/mc23932/mc25090/mc25214/mc25899/mc28092/mc28679/mc29783/mc29987/mc31226/mc31228/mc31242/mc31243/mc33365/mc33732/mc34018/mc34022/mc34114/mc34643/mc38445/mc39361	24
BP	GO:0030182	neuron differentiation	20/1704	86/16975	0.00026698	0.00292505	0.00210619	mc03749/mc06982/mc09847/mc09922/mc11239/mc12078/mc13728/mc14748/mc16870/mc16993/mc19510/mc23262/mc26971/mc27294/mc27451/mc32194/mc36700/mc39597/mc39764/mc40586	20
BP	GO:0010977	negative regulation of neuron projection development	8/1704	19/16975	0.000277713	0.00297721	0.00214375	mc12078/mc13728/mc16870/mc23262/mc26971/mc27451/mc32194/mc39764	8
BP	GO:0031345	negative regulation of cell projection organization	8/1704	19/16975	0.000277713	0.00297721	0.00214375	mc12078/mc13728/mc16870/mc23262/mc26971/mc27451/mc32194/mc39764	8
BP	GO:0045665	negative regulation of neuron differentiation	8/1704	19/16975	0.000277713	0.00297721	0.00214375	mc12078/mc13728/mc16870/mc23262/mc26971/mc27451/mc32194/mc39764	8
BP	GO:1903828	negative regulation of cellular protein localization	8/1704	19/16975	0.000277713	0.00297721	0.00214375	mc12078/mc13728/mc16870/mc23262/mc26971/mc27451/mc32194/mc39764	8
BP	GO:0042430	indole-containing compound metabolic process	21/1704	93/16975	0.000292688	0.00312096	0.00224726	mc00784/mc02113/mc12903/mc22259/mc24586/mc24821/mc28511/mc28518/mc31266/mc31347/mc31348/mc31349/mc31350/mc31352/mc31354/mc31357/mc31360/mc31362/mc34502/mc34508/mc35020	21
BP	GO:0046836	glycolipid transport	6/1704	11/16975	0.000300071	0.00318267	0.0022917	mc23960/mc26574/mc29832/mc30038/mc32641/mc38418	6
BP	GO:1901000	regulation of response to salt stress	17/1704	68/16975	0.000304168	0.00320905	0.00231069	mc00055/mc01207/mc11958/mc11959/mc15679/mc17010/mc17822/mc20734/mc25693/mc26269/mc27282/mc28342/mc31642/mc32889/mc35901/mc39586/mc40790	17
BP	GO:0071236	cellular response to antibiotic	25/1704	120/16975	0.000311354	0.00326758	0.00235284	mc01386/mc02741/mc08820/mc08849/mc11074/mc15940/mc20028/mc20030/mc20032/mc20150/mc24112/mc24131/mc25890/mc26587/mc26588/mc32625/mc32626/mc32627/mc32628/mc32629/mc32630/mc33381/mc34011/mc37009/mc38247	25
BP	GO:0006515	protein quality control for misfolded or incompletely synthesized proteins	11/1704	34/16975	0.000324913	0.00339202	0.00244244	mc00739/mc01785/mc02084/mc03095/mc07746/mc15829/mc20024/mc22305/mc28938/mc30576/mc34960	11
BP	GO:0010192	mucilage biosynthetic process	13/1704	45/16975	0.000337922	0.00350946	0.00252701	mc07376/mc09483/mc12373/mc12377/mc17144/mc21698/mc21701/mc25433/mc25964/mc26391/mc26393/mc33021/mc33023	13
BP	GO:0009736	cytokinin-activated signaling pathway	24/1704	114/16975	0.000345641	0.00357103	0.00257134	mc10514/mc12354/mc15986/mc16390/mc16515/mc17996/mc17997/mc19564/mc20186/mc20588/mc21662/mc21668/mc21685/mc26054/mc26441/mc27412/mc27802/mc33039/mc33079/mc33206/mc35647/mc36066/mc39200/mc39718	24
BP	GO:0022618	ribonucleoprotein complex assembly	38/1704	214/16975	0.000354436	0.00364301	0.00262317	mc00236/mc02316/mc02513/mc04277/mc08597/mc12267/mc13585/mc13956/mc16061/mc16062/mc17655/mc18500/mc20263/mc20404/mc21433/mc21573/mc21597/mc23090/mc24281/mc24560/mc26495/mc26597/mc26636/mc26864/mc26941/mc27095/mc32219/mc32220/mc32221/mc32223/mc32224/mc32226/mc32324/mc32576/mc32610/mc33127/mc35642/mc38080	38
BP	GO:0009933	meristem structural organization	27/1704	135/16975	0.00036605	0.0037431	0.00269524	mc00877/mc01913/mc01914/mc03854/mc05411/mc11356/mc13956/mc16307/mc17593/mc17822/mc18091/mc18500/mc20502/mc20734/mc25162/mc25163/mc34313/mc35123/mc35124/mc35901/mc36177/mc36232/mc36418/mc36430/mc36431/mc36432/mc36495	27
BP	GO:0002239	response to oomycetes	19/1704	82/16975	0.000395466	0.00402326	0.00289697	mc09622/mc22984/mc24031/mc24034/mc24035/mc26760/mc28511/mc30163/mc31347/mc31348/mc31349/mc31350/mc31352/mc31354/mc31357/mc31360/mc32418/mc37672/mc38341	19
BP	GO:0033119	negative regulation of RNA splicing	8/1704	20/16975	0.000422303	0.00418941	0.00301661	mc02605/mc08776/mc14139/mc15221/mc24212/mc24323/mc38159/mc40457	8
BP	GO:0048025	negative regulation of mRNA splicing, via spliceosome	8/1704	20/16975	0.000422303	0.00418941	0.00301661	mc02605/mc08776/mc14139/mc15221/mc24212/mc24323/mc38159/mc40457	8
BP	GO:1901348	positive regulation of secondary cell wall biogenesis	8/1704	20/16975	0.000422303	0.00418941	0.00301661	mc04705/mc07808/mc12472/mc21786/mc26284/mc29621/mc30878/mc32903	8
BP	GO:1901684	arsenate ion transmembrane transport	8/1704	20/16975	0.000422303	0.00418941	0.00301661	mc02623/mc07331/mc08758/mc25078/mc26488/mc31414/mc31897/mc39375	8
BP	GO:1903340	positive regulation of cell wall organization or biogenesis	8/1704	20/16975	0.000422303	0.00418941	0.00301661	mc04705/mc07808/mc12472/mc21786/mc26284/mc29621/mc30878/mc32903	8
BP	GO:0072593	reactive oxygen species metabolic process	38/1704	216/16975	0.000428172	0.00420655	0.00302895	mc10718/mc19202/mc19203/mc19204/mc19673/mc23591/mc27186/mc32042/mc32046/mc32048/mc32051/mc32053/mc32054/mc32055/mc32057/mc37392/mc37393/mc37394/mc37396/mc37399/mc37400/mc37402/mc37403/mc37408/mc37410/mc37435/mc37437/mc37438/mc37439/mc37442/mc37454/mc37485/mc37669/mc37670/mc37680/mc38900/mc39485/mc40586	38
BP	GO:0048359	mucilage metabolic process involved in seed coat development	13/1704	46/16975	0.00042825	0.00420655	0.00302895	mc07376/mc09483/mc12373/mc12377/mc17144/mc21698/mc21701/mc25433/mc25964/mc26391/mc26393/mc33021/mc33023	13
BP	GO:0046854	phosphatidylinositol phosphorylation	11/1704	35/16975	0.000431247	0.00421523	0.0030352	mc00430/mc01396/mc05179/mc06198/mc06984/mc14744/mc15418/mc28783/mc31112/mc34018/mc34114	11
BP	GO:0031344	regulation of cell projection organization	14/1704	52/16975	0.000450809	0.00435986	0.00313934	mc06982/mc12078/mc13728/mc14748/mc16870/mc16993/mc23262/mc26971/mc27294/mc27451/mc32194/mc39597/mc39764/mc40586	14
BP	GO:0120035	regulation of plasma membrane bounded cell projection organization	14/1704	52/16975	0.000450809	0.00435986	0.00313934	mc06982/mc12078/mc13728/mc14748/mc16870/mc16993/mc23262/mc26971/mc27294/mc27451/mc32194/mc39597/mc39764/mc40586	14
BP	GO:0071368	cellular response to cytokinin stimulus	24/1704	116/16975	0.000452604	0.00435986	0.00313934	mc10514/mc12354/mc15986/mc16390/mc16515/mc17996/mc17997/mc19564/mc20186/mc20588/mc21662/mc21668/mc21685/mc26054/mc26441/mc27412/mc27802/mc33039/mc33079/mc33206/mc35647/mc36066/mc39200/mc39718	24
BP	GO:2000652	regulation of secondary cell wall biogenesis	10/1704	30/16975	0.000461831	0.00436278	0.00314144	mc04705/mc07808/mc12472/mc12623/mc21786/mc21961/mc26284/mc29621/mc30878/mc32903	10
BP	GO:0042538	hyperosmotic salinity response	22/1704	103/16975	0.000485875	0.00436278	0.00314144	mc00954/mc01729/mc02313/mc12642/mc15860/mc17822/mc19642/mc20062/mc20606/mc20734/mc21977/mc23632/mc24530/mc24531/mc24532/mc27099/mc28340/mc31646/mc34531/mc34898/mc35766/mc35901	22
BP	GO:0045229	external encapsulating structure organization	55/1704	349/16975	0.000492446	0.00436278	0.00314144	mc02059/mc02226/mc02228/mc02420/mc06051/mc06081/mc08507/mc09065/mc12373/mc12377/mc12770/mc12979/mc13041/mc14090/mc14091/mc14092/mc17817/mc19131/mc19446/mc19559/mc20028/mc20030/mc20032/mc21092/mc21698/mc21701/mc22120/mc22350/mc22470/mc23238/mc24670/mc24762/mc24937/mc25890/mc26391/mc26393/mc26957/mc28511/mc29267/mc30506/mc31347/mc31348/mc31349/mc31350/mc31352/mc31354/mc31357/mc31360/mc32207/mc33021…	55
BP	GO:0007472	wing disc morphogenesis	7/1704	16/16975	0.000512352	0.00436278	0.00314144	mc02323/mc03749/mc09847/mc09922/mc11239/mc19510/mc36700	7
BP	GO:0007476	imaginal disc-derived wing morphogenesis	7/1704	16/16975	0.000512352	0.00436278	0.00314144	mc02323/mc03749/mc09847/mc09922/mc11239/mc19510/mc36700	7
BP	GO:0007552	metamorphosis	7/1704	16/16975	0.000512352	0.00436278	0.00314144	mc02323/mc03749/mc09847/mc09922/mc11239/mc19510/mc36700	7
BP	GO:0007560	imaginal disc morphogenesis	7/1704	16/16975	0.000512352	0.00436278	0.00314144	mc02323/mc03749/mc09847/mc09922/mc11239/mc19510/mc36700	7
BP	GO:0010976	positive regulation of neuron projection development	7/1704	16/16975	0.000512352	0.00436278	0.00314144	mc06982/mc12078/mc14748/mc16870/mc27451/mc39764/mc40586	7
BP	GO:0035114	imaginal disc-derived appendage morphogenesis	7/1704	16/16975	0.000512352	0.00436278	0.00314144	mc02323/mc03749/mc09847/mc09922/mc11239/mc19510/mc36700	7
BP	GO:0035120	post-embryonic appendage morphogenesis	7/1704	16/16975	0.000512352	0.00436278	0.00314144	mc02323/mc03749/mc09847/mc09922/mc11239/mc19510/mc36700	7
BP	GO:0048563	post-embryonic animal organ morphogenesis	7/1704	16/16975	0.000512352	0.00436278	0.00314144	mc02323/mc03749/mc09847/mc09922/mc11239/mc19510/mc36700	7
BP	GO:0048707	instar larval or pupal morphogenesis	7/1704	16/16975	0.000512352	0.00436278	0.00314144	mc02323/mc03749/mc09847/mc09922/mc11239/mc19510/mc36700	7
BP	GO:0048737	imaginal disc-derived appendage development	7/1704	16/16975	0.000512352	0.00436278	0.00314144	mc02323/mc03749/mc09847/mc09922/mc11239/mc19510/mc36700	7
BP	GO:0009958	positive gravitropism	13/1704	47/16975	0.00053825	0.00436278	0.00314144	mc00430/mc01396/mc06140/mc07087/mc13978/mc14638/mc14639/mc23932/mc29783/mc29987/mc34018/mc34114/mc38445	13
BP	GO:0030097	hemopoiesis	13/1704	47/16975	0.00053825	0.00436278	0.00314144	mc02605/mc03749/mc08776/mc09847/mc09922/mc11239/mc19510/mc24212/mc26565/mc26566/mc36700/mc37860/mc38159	13
BP	GO:0080092	regulation of pollen tube growth	16/1704	65/16975	0.000545802	0.00436278	0.00314144	mc05244/mc05641/mc05960/mc06261/mc06453/mc06868/mc10065/mc14182/mc14810/mc15196/mc19350/mc21187/mc28473/mc29665/mc30240/mc37084	16
BP	GO:0007398	ectoderm development	6/1704	12/16975	0.000549176	0.00436278	0.00314144	mc03749/mc09847/mc09922/mc11239/mc19510/mc36700	6
BP	GO:0007616	long-term memory	6/1704	12/16975	0.000549176	0.00436278	0.00314144	mc03749/mc09847/mc09922/mc11239/mc19510/mc36700	6
BP	GO:0008052	sensory organ boundary specification	6/1704	12/16975	0.000549176	0.00436278	0.00314144	mc03749/mc09847/mc09922/mc11239/mc19510/mc36700	6
BP	GO:0010071	root meristem specification	6/1704	12/16975	0.000549176	0.00436278	0.00314144	mc00877/mc01913/mc01914/mc34313/mc35123/mc35124	6
BP	GO:0010160	formation of animal organ boundary	6/1704	12/16975	0.000549176	0.00436278	0.00314144	mc03749/mc09847/mc09922/mc11239/mc19510/mc36700	6
BP	GO:0016360	sensory organ precursor cell fate determination	6/1704	12/16975	0.000549176	0.00436278	0.00314144	mc03749/mc09847/mc09922/mc11239/mc19510/mc36700	6
BP	GO:0033240	positive regulation of cellular amine metabolic process	6/1704	12/16975	0.000549176	0.00436278	0.00314144	mc00784/mc02113/mc12903/mc22259/mc24821/mc35020	6
BP	GO:0035166	post-embryonic hemopoiesis	6/1704	12/16975	0.000549176	0.00436278	0.00314144	mc03749/mc09847/mc09922/mc11239/mc19510/mc36700	6
BP	GO:0035167	larval lymph gland hemopoiesis	6/1704	12/16975	0.000549176	0.00436278	0.00314144	mc03749/mc09847/mc09922/mc11239/mc19510/mc36700	6
BP	GO:0035168	larval lymph gland hemocyte differentiation	6/1704	12/16975	0.000549176	0.00436278	0.00314144	mc03749/mc09847/mc09922/mc11239/mc19510/mc36700	6
BP	GO:0035171	lamellocyte differentiation	6/1704	12/16975	0.000549176	0.00436278	0.00314144	mc03749/mc09847/mc09922/mc11239/mc19510/mc36700	6
BP	GO:0035203	regulation of lamellocyte differentiation	6/1704	12/16975	0.000549176	0.00436278	0.00314144	mc03749/mc09847/mc09922/mc11239/mc19510/mc36700	6
BP	GO:0035204	negative regulation of lamellocyte differentiation	6/1704	12/16975	0.000549176	0.00436278	0.00314144	mc03749/mc09847/mc09922/mc11239/mc19510/mc36700	6
BP	GO:0042386	hemocyte differentiation	6/1704	12/16975	0.000549176	0.00436278	0.00314144	mc03749/mc09847/mc09922/mc11239/mc19510/mc36700	6
BP	GO:0042387	plasmatocyte differentiation	6/1704	12/16975	0.000549176	0.00436278	0.00314144	mc03749/mc09847/mc09922/mc11239/mc19510/mc36700	6
BP	GO:0042478	regulation of eye photoreceptor cell development	6/1704	12/16975	0.000549176	0.00436278	0.00314144	mc03749/mc09847/mc09922/mc11239/mc19510/mc36700	6
BP	GO:0045314	regulation of compound eye photoreceptor development	6/1704	12/16975	0.000549176	0.00436278	0.00314144	mc03749/mc09847/mc09922/mc11239/mc19510/mc36700	6
BP	GO:0045610	regulation of hemocyte differentiation	6/1704	12/16975	0.000549176	0.00436278	0.00314144	mc03749/mc09847/mc09922/mc11239/mc19510/mc36700	6
BP	GO:0045611	negative regulation of hemocyte differentiation	6/1704	12/16975	0.000549176	0.00436278	0.00314144	mc03749/mc09847/mc09922/mc11239/mc19510/mc36700	6
BP	GO:0045613	regulation of plasmatocyte differentiation	6/1704	12/16975	0.000549176	0.00436278	0.00314144	mc03749/mc09847/mc09922/mc11239/mc19510/mc36700	6
BP	GO:0045614	negative regulation of plasmatocyte differentiation	6/1704	12/16975	0.000549176	0.00436278	0.00314144	mc03749/mc09847/mc09922/mc11239/mc19510/mc36700	6
BP	GO:0045764	positive regulation of cellular amino acid metabolic process	6/1704	12/16975	0.000549176	0.00436278	0.00314144	mc00784/mc02113/mc12903/mc22259/mc24821/mc35020	6
BP	GO:0046532	regulation of photoreceptor cell differentiation	6/1704	12/16975	0.000549176	0.00436278	0.00314144	mc03749/mc09847/mc09922/mc11239/mc19510/mc36700	6
BP	GO:0048542	lymph gland development	6/1704	12/16975	0.000549176	0.00436278	0.00314144	mc03749/mc09847/mc09922/mc11239/mc19510/mc36700	6
BP	GO:0048645	animal organ formation	6/1704	12/16975	0.000549176	0.00436278	0.00314144	mc03749/mc09847/mc09922/mc11239/mc19510/mc36700	6
BP	GO:0060582	cell fate determination involved in pattern specification	6/1704	12/16975	0.000549176	0.00436278	0.00314144	mc03749/mc09847/mc09922/mc11239/mc19510/mc36700	6
BP	GO:0060919	auxin influx	6/1704	12/16975	0.000549176	0.00436278	0.00314144	mc01400/mc23932/mc29783/mc29987/mc34022/mc38445	6
BP	GO:0090355	positive regulation of auxin metabolic process	6/1704	12/16975	0.000549176	0.00436278	0.00314144	mc00784/mc02113/mc12903/mc22259/mc24821/mc35020	6
BP	GO:0009851	auxin biosynthetic process	14/1704	53/16975	0.000556787	0.00439664	0.00316582	mc28511/mc28518/mc31266/mc31347/mc31348/mc31349/mc31350/mc31352/mc31354/mc31357/mc31360/mc31362/mc34502/mc34508	14
BP	GO:0048278	vesicle docking	15/1704	59/16975	0.000557848	0.00439664	0.00316582	mc00718/mc02229/mc02609/mc03697/mc04562/mc07681/mc08772/mc11192/mc11621/mc12766/mc17355/mc22118/mc28895/mc30982/mc35355	15
BP	GO:0071826	ribonucleoprotein complex subunit organization	38/1704	219/16975	0.000564421	0.00443093	0.00319051	mc00236/mc02316/mc02513/mc04277/mc08597/mc12267/mc13585/mc13956/mc16061/mc16062/mc17655/mc18500/mc20263/mc20404/mc21433/mc21573/mc21597/mc23090/mc24281/mc24560/mc26495/mc26597/mc26636/mc26864/mc26941/mc27095/mc32219/mc32220/mc32221/mc32223/mc32224/mc32226/mc32324/mc32576/mc32610/mc33127/mc35642/mc38080	38
BP	GO:0070925	organelle assembly	47/1704	288/16975	0.000566887	0.00443283	0.00319188	mc00236/mc02059/mc02316/mc02513/mc03104/mc04277/mc08597/mc09185/mc10008/mc12178/mc12267/mc12979/mc13585/mc13956/mc16764/mc16765/mc17655/mc18500/mc20404/mc21113/mc21433/mc21573/mc21597/mc22350/mc23090/mc24281/mc24560/mc24762/mc26597/mc26636/mc26864/mc26941/mc27095/mc27584/mc32219/mc32220/mc32221/mc32223/mc32224/mc32226/mc32324/mc32576/mc32610/mc35642/mc38080/mc39946/mc40586	47
BP	GO:0010928	regulation of auxin mediated signaling pathway	24/1704	119/16975	0.000667199	0.00519686	0.00374202	mc00355/mc00784/mc02113/mc03646/mc05194/mc06996/mc07444/mc09744/mc12903/mc12958/mc14729/mc15422/mc18896/mc22259/mc22322/mc24356/mc24821/mc25972/mc28997/mc30291/mc33277/mc34095/mc35020/mc37980	24
BP	GO:0006612	protein targeting to membrane	13/1704	48/16975	0.000671209	0.00520269	0.00374622	mc04277/mc12078/mc13585/mc13728/mc16870/mc23090/mc23262/mc26864/mc26971/mc27451/mc32194/mc32324/mc39764	13
BP	GO:0022406	membrane docking	15/1704	60/16975	0.000675775	0.00520269	0.00374622	mc00718/mc02229/mc02609/mc03697/mc04562/mc07681/mc08772/mc11192/mc11621/mc12766/mc17355/mc22118/mc28895/mc30982/mc35355	15
BP	GO:0140056	organelle localization by membrane tethering	15/1704	60/16975	0.000675775	0.00520269	0.00374622	mc00718/mc02229/mc02609/mc03697/mc04562/mc07681/mc08772/mc11192/mc11621/mc12766/mc17355/mc22118/mc28895/mc30982/mc35355	15
BP	GO:0048699	generation of neurons	20/1704	92/16975	0.000679263	0.00520943	0.00375107	mc03749/mc06982/mc09847/mc09922/mc11239/mc12078/mc13728/mc14748/mc16870/mc16993/mc19510/mc23262/mc26971/mc27294/mc27451/mc32194/mc36700/mc39597/mc39764/mc40586	20
BP	GO:0009734	auxin-activated signaling pathway	43/1704	260/16975	0.000720444	0.00550408	0.00396324	mc00100/mc00355/mc00784/mc02011/mc02113/mc02980/mc03646/mc05065/mc05194/mc06996/mc07347/mc07444/mc09744/mc12903/mc12958/mc13041/mc13296/mc14729/mc15422/mc18896/mc22259/mc22322/mc22417/mc22470/mc22775/mc23221/mc24356/mc24464/mc24670/mc24714/mc24821/mc25972/mc28536/mc28997/mc30291/mc30322/mc30481/mc31368/mc32217/mc33277/mc34095/mc35020/mc37980	43
BP	GO:0035220	wing disc development	7/1704	17/16975	0.000795857	0.00598845	0.00431201	mc02323/mc03749/mc09847/mc09922/mc11239/mc19510/mc36700	7
BP	GO:0035264	multicellular organism growth	7/1704	17/16975	0.000795857	0.00598845	0.00431201	mc00954/mc01729/mc26565/mc26566/mc34531/mc34898/mc37860	7
BP	GO:0045666	positive regulation of neuron differentiation	7/1704	17/16975	0.000795857	0.00598845	0.00431201	mc06982/mc12078/mc14748/mc16870/mc27451/mc39764/mc40586	7
BP	GO:0048569	post-embryonic animal organ development	7/1704	17/16975	0.000795857	0.00598845	0.00431201	mc02323/mc03749/mc09847/mc09922/mc11239/mc19510/mc36700	7
BP	GO:0009741	response to brassinosteroid	34/1704	193/16975	0.000815128	0.00611039	0.00439982	mc00748/mc01682/mc01788/mc02365/mc03126/mc07210/mc08227/mc08471/mc09211/mc11974/mc14525/mc14942/mc15860/mc16123/mc16427/mc16992/mc18556/mc20062/mc20332/mc20662/mc21111/mc25972/mc28672/mc29324/mc29361/mc30617/mc31224/mc33277/mc34461/mc34982/mc35598/mc39596/mc40277/mc40774	34
BP	GO:0048658	anther wall tapetum development	14/1704	55/16975	0.000833032	0.00622122	0.00447962	mc03054/mc03112/mc09135/mc09198/mc10280/mc10284/mc10288/mc10289/mc10298/mc10299/mc27597/mc28887/mc30607/mc39969	14
BP	GO:0120036	plasma membrane bounded cell projection organization	26/1704	135/16975	0.000845909	0.00629382	0.00453189	mc02476/mc03104/mc06982/mc08565/mc09185/mc12078/mc12178/mc12700/mc13728/mc14748/mc16764/mc16765/mc16870/mc16993/mc22043/mc23262/mc26971/mc27146/mc27294/mc27451/mc27584/mc32194/mc39597/mc39764/mc39946/mc40586	26
BP	GO:0030330	DNA damage response, signal transduction by p53 class mediator	8/1704	22/16975	0.000892749	0.00654464	0.0047125	mc04277/mc13585/mc23090/mc26565/mc26566/mc26864/mc32324/mc37860	8
BP	GO:0031589	cell-substrate adhesion	8/1704	22/16975	0.000892749	0.00654464	0.0047125	mc12473/mc17258/mc21787/mc25206/mc28307/mc31681/mc32902/mc40124	8
BP	GO:0050686	negative regulation of mRNA processing	8/1704	22/16975	0.000892749	0.00654464	0.0047125	mc02605/mc08776/mc14139/mc15221/mc24212/mc24323/mc38159/mc40457	8
BP	GO:0051146	striated muscle cell differentiation	8/1704	22/16975	0.000892749	0.00654464	0.0047125	mc00739/mc01785/mc02084/mc07746/mc22305/mc28938/mc34960/mc40586	8
BP	GO:0007498	mesoderm development	6/1704	13/16975	0.000933467	0.00676848	0.00487368	mc03749/mc09847/mc09922/mc11239/mc19510/mc36700	6
BP	GO:0042051	compound eye photoreceptor development	6/1704	13/16975	0.000933467	0.00676848	0.00487368	mc03749/mc09847/mc09922/mc11239/mc19510/mc36700	6
BP	GO:0060581	cell fate commitment involved in pattern specification	6/1704	13/16975	0.000933467	0.00676848	0.00487368	mc03749/mc09847/mc09922/mc11239/mc19510/mc36700	6
BP	GO:0016106	sesquiterpenoid biosynthetic process	13/1704	50/16975	0.00102099	0.00734963	0.00529214	mc00837/mc01851/mc02313/mc10412/mc12642/mc16659/mc19175/mc21977/mc27099/mc34383/mc35072/mc37539/mc39256	13
BP	GO:0048534	hematopoietic or lymphoid organ development	13/1704	50/16975	0.00102099	0.00734963	0.00529214	mc02605/mc03749/mc08776/mc09847/mc09922/mc11239/mc19510/mc24212/mc26565/mc26566/mc36700/mc37860/mc38159	13
BP	GO:0072657	protein localization to membrane	21/1704	102/16975	0.00106834	0.00766283	0.00551765	mc04277/mc12078/mc12473/mc13585/mc13728/mc16870/mc17258/mc21787/mc23090/mc23262/mc25206/mc26864/mc26971/mc27451/mc28307/mc31681/mc32194/mc32324/mc32902/mc39764/mc40124	21
BP	GO:0045595	regulation of cell differentiation	44/1704	273/16975	0.00108356	0.00774413	0.0055762	mc03749/mc05244/mc05641/mc05960/mc06261/mc06453/mc06868/mc06982/mc09847/mc09922/mc10001/mc10065/mc11239/mc12078/mc13728/mc14182/mc14330/mc14748/mc14810/mc15196/mc16197/mc16870/mc16993/mc17673/mc19350/mc19510/mc21187/mc23262/mc25833/mc26971/mc27294/mc27451/mc28473/mc29313/mc29665/mc30240/mc32194/mc33439/mc35417/mc36700/mc37084/mc39597/mc39764/mc40586	44
BP	GO:0002790	peptide secretion	15/1704	63/16975	0.00116406	0.00816438	0.0058788	mc11192/mc12473/mc17258/mc21787/mc22279/mc24530/mc24531/mc24532/mc25206/mc28307/mc28340/mc31646/mc31681/mc32902/mc40124	15
BP	GO:0009306	protein secretion	15/1704	63/16975	0.00116406	0.00816438	0.0058788	mc11192/mc12473/mc17258/mc21787/mc22279/mc24530/mc24531/mc24532/mc25206/mc28307/mc28340/mc31646/mc31681/mc32902/mc40124	15
BP	GO:0035592	establishment of protein localization to extracellular region	15/1704	63/16975	0.00116406	0.00816438	0.0058788	mc11192/mc12473/mc17258/mc21787/mc22279/mc24530/mc24531/mc24532/mc25206/mc28307/mc28340/mc31646/mc31681/mc32902/mc40124	15
BP	GO:0071692	protein localization to extracellular region	15/1704	63/16975	0.00116406	0.00816438	0.0058788	mc11192/mc12473/mc17258/mc21787/mc22279/mc24530/mc24531/mc24532/mc25206/mc28307/mc28340/mc31646/mc31681/mc32902/mc40124	15
BP	GO:0009965	leaf morphogenesis	32/1704	182/16975	0.00118035	0.00816438	0.0058788	mc00877/mc01913/mc01914/mc09288/mc10420/mc12448/mc16158/mc16708/mc18708/mc19620/mc20028/mc20030/mc20032/mc20373/mc21766/mc25890/mc26087/mc26299/mc27663/mc28586/mc28849/mc30399/mc31039/mc32697/mc32926/mc33381/mc34313/mc35123/mc35124/mc35488/mc39347/mc40118	32
BP	GO:0001654	eye development	7/1704	18/16975	0.00119016	0.00816438	0.0058788	mc03749/mc09847/mc09922/mc11239/mc19510/mc36700/mc40586	7
BP	GO:0031627	telomeric loop formation	7/1704	18/16975	0.00119016	0.00816438	0.0058788	mc03569/mc03659/mc09662/mc09761/mc11166/mc17378/mc18955	7
BP	GO:0048592	eye morphogenesis	7/1704	18/16975	0.00119016	0.00816438	0.0058788	mc03749/mc09847/mc09922/mc11239/mc19510/mc36700/mc40586	7
BP	GO:0048880	sensory system development	7/1704	18/16975	0.00119016	0.00816438	0.0058788	mc03749/mc09847/mc09922/mc11239/mc19510/mc36700/mc40586	7
BP	GO:0150063	visual system development	7/1704	18/16975	0.00119016	0.00816438	0.0058788	mc03749/mc09847/mc09922/mc11239/mc19510/mc36700/mc40586	7
BP	GO:0048667	cell morphogenesis involved in neuron differentiation	9/1704	28/16975	0.00119149	0.00816438	0.0058788	mc12078/mc13728/mc16870/mc23262/mc26971/mc27451/mc32194/mc39764/mc40586	9
BP	GO:1902930	regulation of alcohol biosynthetic process	9/1704	28/16975	0.00119149	0.00816438	0.0058788	mc00837/mc01851/mc10412/mc16659/mc19175/mc34383/mc35072/mc37539/mc39256	9
BP	GO:0009967	positive regulation of signal transduction	43/1704	267/16975	0.00124539	0.00850446	0.00612368	mc00055/mc00355/mc02067/mc03646/mc03749/mc04418/mc05194/mc06996/mc07444/mc07542/mc09744/mc09847/mc09922/mc11239/mc12958/mc12972/mc13581/mc14729/mc15422/mc16349/mc18029/mc18896/mc19510/mc20540/mc22322/mc22339/mc23085/mc24356/mc25972/mc26269/mc26860/mc28342/mc28997/mc30291/mc31642/mc32328/mc32889/mc33277/mc34095/mc36140/mc36700/mc37980/mc40586	43
BP	GO:0043902	positive regulation of multi-organism process	18/1704	83/16975	0.00127057	0.00864681	0.00622618	mc00055/mc01207/mc02609/mc03697/mc08772/mc16349/mc18029/mc20540/mc24031/mc24034/mc24035/mc26269/mc28342/mc30163/mc31642/mc32889/mc36140/mc38341	18
BP	GO:0001751	compound eye photoreceptor cell differentiation	6/1704	14/16975	0.00149543	0.00997283	0.00718099	mc03749/mc09847/mc09922/mc11239/mc19510/mc36700	6
BP	GO:0007422	peripheral nervous system development	6/1704	14/16975	0.00149543	0.00997283	0.00718099	mc03749/mc09847/mc09922/mc11239/mc19510/mc36700	6
BP	GO:0042461	photoreceptor cell development	6/1704	14/16975	0.00149543	0.00997283	0.00718099	mc03749/mc09847/mc09922/mc11239/mc19510/mc36700	6
BP	GO:0042462	eye photoreceptor cell development	6/1704	14/16975	0.00149543	0.00997283	0.00718099	mc03749/mc09847/mc09922/mc11239/mc19510/mc36700	6
BP	GO:0045747	positive regulation of Notch signaling pathway	6/1704	14/16975	0.00149543	0.00997283	0.00718099	mc03749/mc09847/mc09922/mc11239/mc19510/mc36700	6
BP	GO:1903707	negative regulation of hemopoiesis	6/1704	14/16975	0.00149543	0.00997283	0.00718099	mc03749/mc09847/mc09922/mc11239/mc19510/mc36700	6
BP	GO:0030030	cell projection organization	26/1704	141/16975	0.00163504	0.0108676	0.00782524	mc02476/mc03104/mc06982/mc08565/mc09185/mc12078/mc12178/mc12700/mc13728/mc14748/mc16764/mc16765/mc16870/mc16993/mc22043/mc23262/mc26971/mc27146/mc27294/mc27451/mc27584/mc32194/mc39597/mc39764/mc39946/mc40586	26
BP	GO:0006919	activation of cysteine-type endopeptidase activity involved in apoptotic process	5/1704	10/16975	0.00165675	0.0109028	0.00785062	mc04277/mc13585/mc23090/mc26864/mc32324	5
BP	GO:0008088	axo-dendritic transport	5/1704	10/16975	0.00165675	0.0109028	0.00785062	mc02059/mc12979/mc22350/mc24762/mc40586	5
BP	GO:0046683	response to organophosphorus	5/1704	10/16975	0.00165675	0.0109028	0.00785062	mc02476/mc08565/mc12700/mc22043/mc27146	5
BP	GO:0023056	positive regulation of signaling	43/1704	271/16975	0.00167644	0.0109961	0.00791781	mc00055/mc00355/mc02067/mc03646/mc03749/mc04418/mc05194/mc06996/mc07444/mc07542/mc09744/mc09847/mc09922/mc11239/mc12958/mc12972/mc13581/mc14729/mc15422/mc16349/mc18029/mc18896/mc19510/mc20540/mc22322/mc22339/mc23085/mc24356/mc25972/mc26269/mc26860/mc28342/mc28997/mc30291/mc31642/mc32328/mc32889/mc33277/mc34095/mc36140/mc36700/mc37980/mc40586	43
BP	GO:0007409	axonogenesis	8/1704	24/16975	0.00171094	0.0111128	0.0080018	mc12078/mc13728/mc16870/mc23262/mc26971/mc27451/mc32194/mc39764	8
BP	GO:0051224	negative regulation of protein transport	8/1704	24/16975	0.00171094	0.0111128	0.0080018	mc12078/mc13728/mc16870/mc23262/mc26971/mc27451/mc32194/mc39764	8
BP	GO:1904950	negative regulation of establishment of protein localization	8/1704	24/16975	0.00171094	0.0111128	0.0080018	mc12078/mc13728/mc16870/mc23262/mc26971/mc27451/mc32194/mc39764	8
BP	GO:0048830	adventitious root development	7/1704	19/16975	0.00172241	0.011151	0.0080293	mc13041/mc22470/mc24670/mc25090/mc25214/mc28092/mc39361	7
BP	GO:0080050	regulation of seed development	19/1704	92/16975	0.00174045	0.0112312	0.00808711	mc00049/mc03870/mc05194/mc05422/mc06996/mc11371/mc14729/mc15422/mc16390/mc17996/mc17997/mc20588/mc21668/mc24428/mc25972/mc28997/mc30291/mc33277/mc36066	19
BP	GO:0032101	regulation of response to external stimulus	53/1704	352/16975	0.00176605	0.0112832	0.00812456	mc00055/mc01207/mc02609/mc03697/mc04477/mc07606/mc08772/mc08820/mc11074/mc12623/mc16349/mc18029/mc18708/mc20028/mc20030/mc20032/mc20540/mc21961/mc24031/mc24034/mc24035/mc24131/mc25890/mc26269/mc26587/mc26588/mc28342/mc28511/mc28849/mc30163/mc30399/mc31039/mc31347/mc31348/mc31349/mc31350/mc31352/mc31354/mc31357/mc31360/mc31642/mc32625/mc32626/mc32627/mc32628/mc32629/mc32630/mc32889/mc33381/mc36140…	53
BP	GO:0044106	cellular amine metabolic process	20/1704	99/16975	0.00176775	0.0112832	0.00812456	mc00784/mc02113/mc07197/mc12903/mc14521/mc16280/mc20472/mc22259/mc24586/mc24821/mc28511/mc31347/mc31348/mc31349/mc31350/mc31352/mc31354/mc31357/mc31360/mc35020	20
BP	GO:0051606	detection of stimulus	20/1704	99/16975	0.00176775	0.0112832	0.00812456	mc02476/mc03014/mc04530/mc06179/mc07027/mc07649/mc08179/mc08565/mc09091/mc12700/mc14690/mc15923/mc18107/mc22043/mc25983/mc27146/mc28877/mc31016/mc33267/mc39358	20
BP	GO:0009593	detection of chemical stimulus	10/1704	35/16975	0.00177114	0.0112832	0.00812456	mc04530/mc07649/mc08179/mc15923/mc18107/mc25983/mc28877/mc31016/mc33267/mc39358	10
BP	GO:0009739	response to gibberellin	44/1704	280/16975	0.00181145	0.0115033	0.00828299	mc00355/mc02059/mc03569/mc03646/mc04655/mc04687/mc05687/mc06140/mc07087/mc07444/mc07792/mc09662/mc09744/mc12958/mc12979/mc13978/mc14638/mc14639/mc15986/mc17378/mc18896/mc19564/mc19584/mc20186/mc22322/mc22350/mc24356/mc24762/mc25290/mc25972/mc26054/mc29633/mc30891/mc30918/mc33206/mc33277/mc33736/mc34095/mc34646/mc35439/mc35647/mc37980/mc40217/mc40762	44
BP	GO:0046834	lipid phosphorylation	11/1704	41/16975	0.00185965	0.0117677	0.00847336	mc00430/mc01396/mc05179/mc06198/mc06984/mc14744/mc15418/mc28783/mc31112/mc34018/mc34114	11
BP	GO:0009606	tropism	28/1704	157/16975	0.00186488	0.0117677	0.00847336	mc00430/mc00982/mc01396/mc04418/mc05035/mc05194/mc06140/mc06996/mc07087/mc07542/mc08104/mc13978/mc14638/mc14639/mc14729/mc15422/mc22416/mc23411/mc23932/mc28997/mc29783/mc29987/mc30291/mc32104/mc34018/mc34114/mc34875/mc38445	28
BP	GO:0007265	Ras protein signal transduction	9/1704	30/16975	0.00205284	0.0127519	0.00918208	mc12078/mc13728/mc16870/mc23262/mc26971/mc27451/mc32194/mc39764/mc40586	9
BP	GO:0009700	indole phytoalexin biosynthetic process	9/1704	30/16975	0.00205284	0.0127519	0.00918208	mc28511/mc31347/mc31348/mc31349/mc31350/mc31352/mc31354/mc31357/mc31360	9
BP	GO:0010120	camalexin biosynthetic process	9/1704	30/16975	0.00205284	0.0127519	0.00918208	mc28511/mc31347/mc31348/mc31349/mc31350/mc31352/mc31354/mc31357/mc31360	9
BP	GO:0046217	indole phytoalexin metabolic process	9/1704	30/16975	0.00205284	0.0127519	0.00918208	mc28511/mc31347/mc31348/mc31349/mc31350/mc31352/mc31354/mc31357/mc31360	9
BP	GO:0052317	camalexin metabolic process	9/1704	30/16975	0.00205284	0.0127519	0.00918208	mc28511/mc31347/mc31348/mc31349/mc31350/mc31352/mc31354/mc31357/mc31360	9
BP	GO:0000956	nuclear-transcribed mRNA catabolic process	24/1704	129/16975	0.0021384	0.0131897	0.00949731	mc00877/mc01913/mc01914/mc02316/mc04277/mc12267/mc13585/mc21573/mc23090/mc26597/mc26864/mc26941/mc27095/mc32219/mc32220/mc32221/mc32223/mc32224/mc32226/mc32324/mc32610/mc34313/mc35123/mc35124	24
BP	GO:0030587	sorocarp development	13/1704	54/16975	0.00218264	0.0131897	0.00949731	mc02476/mc08565/mc12473/mc12700/mc17258/mc21787/mc22043/mc25206/mc27146/mc28307/mc31681/mc32902/mc40124	13
BP	GO:0090702	non-reproductive fruiting body development	13/1704	54/16975	0.00218264	0.0131897	0.00949731	mc02476/mc08565/mc12473/mc12700/mc17258/mc21787/mc22043/mc25206/mc27146/mc28307/mc31681/mc32902/mc40124	13
BP	GO:0099120	socially cooperative development	13/1704	54/16975	0.00218264	0.0131897	0.00949731	mc02476/mc08565/mc12473/mc12700/mc17258/mc21787/mc22043/mc25206/mc27146/mc28307/mc31681/mc32902/mc40124	13
BP	GO:0048638	regulation of developmental growth	41/1704	259/16975	0.00221347	0.0131897	0.00949731	mc03006/mc05194/mc05244/mc05641/mc05960/mc06261/mc06453/mc06868/mc06996/mc10065/mc12078/mc14182/mc14729/mc14810/mc15196/mc15422/mc16197/mc16390/mc16870/mc17673/mc17996/mc17997/mc19350/mc20588/mc21187/mc21668/mc25972/mc27383/mc27451/mc28473/mc28997/mc29665/mc30240/mc30291/mc30518/mc33277/mc35417/mc36066/mc37084/mc39689/mc39764	41
BP	GO:0003008	system process	19/1704	94/16975	0.0022595	0.0131897	0.00949731	mc03749/mc06982/mc09847/mc09922/mc09958/mc11239/mc14748/mc19510/mc21069/mc26524/mc33153/mc36700/mc39218/mc39220/mc39221/mc40586/mc40837/mc40904/mc40907	19
BP	GO:0042274	ribosomal small subunit biogenesis	19/1704	94/16975	0.0022595	0.0131897	0.00949731	mc00236/mc02513/mc04277/mc08597/mc10810/mc13585/mc13956/mc17655/mc18500/mc21433/mc23090/mc24281/mc24560/mc26864/mc32324/mc35642/mc38080/mc38712/mc40515	19
BP	GO:0001745	compound eye morphogenesis	6/1704	15/16975	0.00228207	0.0131897	0.00949731	mc03749/mc09847/mc09922/mc11239/mc19510/mc36700	6
BP	GO:0001754	eye photoreceptor cell differentiation	6/1704	15/16975	0.00228207	0.0131897	0.00949731	mc03749/mc09847/mc09922/mc11239/mc19510/mc36700	6
BP	GO:0002064	epithelial cell development	6/1704	15/16975	0.00228207	0.0131897	0.00949731	mc03749/mc09847/mc09922/mc11239/mc19510/mc36700	6
BP	GO:0002065	columnar/cuboidal epithelial cell differentiation	6/1704	15/16975	0.00228207	0.0131897	0.00949731	mc03749/mc09847/mc09922/mc11239/mc19510/mc36700	6
BP	GO:0002066	columnar/cuboidal epithelial cell development	6/1704	15/16975	0.00228207	0.0131897	0.00949731	mc03749/mc09847/mc09922/mc11239/mc19510/mc36700	6
BP	GO:0002283	neutrophil activation involved in immune response	6/1704	15/16975	0.00228207	0.0131897	0.00949731	mc23960/mc26574/mc29832/mc30038/mc32641/mc38418	6
BP	GO:0002444	myeloid leukocyte mediated immunity	6/1704	15/16975	0.00228207	0.0131897	0.00949731	mc23960/mc26574/mc29832/mc30038/mc32641/mc38418	6
BP	GO:0002446	neutrophil mediated immunity	6/1704	15/16975	0.00228207	0.0131897	0.00949731	mc23960/mc26574/mc29832/mc30038/mc32641/mc38418	6
BP	GO:0030707	ovarian follicle cell development	6/1704	15/16975	0.00228207	0.0131897	0.00949731	mc03749/mc09847/mc09922/mc11239/mc19510/mc36700	6
BP	GO:0030718	germ-line stem cell population maintenance	6/1704	15/16975	0.00228207	0.0131897	0.00949731	mc03749/mc09847/mc09922/mc11239/mc19510/mc36700	6
BP	GO:0031086	nuclear-transcribed mRNA catabolic process, deadenylation-independent decay	6/1704	15/16975	0.00228207	0.0131897	0.00949731	mc00877/mc01913/mc01914/mc34313/mc35123/mc35124	6
BP	GO:0031087	deadenylation-independent decapping of nuclear-transcribed mRNA	6/1704	15/16975	0.00228207	0.0131897	0.00949731	mc00877/mc01913/mc01914/mc34313/mc35123/mc35124	6
BP	GO:0042119	neutrophil activation	6/1704	15/16975	0.00228207	0.0131897	0.00949731	mc23960/mc26574/mc29832/mc30038/mc32641/mc38418	6
BP	GO:0043299	leukocyte degranulation	6/1704	15/16975	0.00228207	0.0131897	0.00949731	mc23960/mc26574/mc29832/mc30038/mc32641/mc38418	6
BP	GO:0043312	neutrophil degranulation	6/1704	15/16975	0.00228207	0.0131897	0.00949731	mc23960/mc26574/mc29832/mc30038/mc32641/mc38418	6
BP	GO:0046530	photoreceptor cell differentiation	6/1704	15/16975	0.00228207	0.0131897	0.00949731	mc03749/mc09847/mc09922/mc11239/mc19510/mc36700	6
BP	GO:0048749	compound eye development	6/1704	15/16975	0.00228207	0.0131897	0.00949731	mc03749/mc09847/mc09922/mc11239/mc19510/mc36700	6
BP	GO:0002165	instar larval or pupal development	8/1704	25/16975	0.00229725	0.0132391	0.00953287	mc02323/mc03749/mc09847/mc09922/mc11239/mc19510/mc36700/mc40586	8
BP	GO:1902600	proton transmembrane transport	34/1704	205/16975	0.002343	0.0134638	0.00969466	mc00790/mc01005/mc01691/mc01800/mc01801/mc01814/mc02118/mc02588/mc05318/mc08678/mc12548/mc12893/mc13500/mc16795/mc23000/mc24803/mc24823/mc26191/mc27532/mc28679/mc29572/mc30828/mc30909/mc31226/mc31228/mc31242/mc31243/mc32798/mc34424/mc34448/mc34570/mc35031/mc38145/mc40897	34
BP	GO:0048528	post-embryonic root development	40/1704	252/16975	0.00236506	0.0135515	0.00975786	mc00100/mc00430/mc01110/mc01396/mc01400/mc01985/mc03746/mc09844/mc10412/mc11233/mc13022/mc13296/mc16659/mc19175/mc22457/mc22775/mc23932/mc24464/mc24684/mc25090/mc25214/mc25899/mc28092/mc28679/mc29783/mc29987/mc31226/mc31228/mc31242/mc31243/mc33365/mc33732/mc34018/mc34022/mc34114/mc34643/mc37539/mc38445/mc39256/mc39361	40
BP	GO:0007219	Notch signaling pathway	7/1704	20/16975	0.00242247	0.0137228	0.00988115	mc02323/mc03749/mc09847/mc09922/mc11239/mc19510/mc36700	7
BP	GO:0007444	imaginal disc development	7/1704	20/16975	0.00242247	0.0137228	0.00988115	mc02323/mc03749/mc09847/mc09922/mc11239/mc19510/mc36700	7
BP	GO:0050769	positive regulation of neurogenesis	7/1704	20/16975	0.00242247	0.0137228	0.00988115	mc06982/mc12078/mc14748/mc16870/mc27451/mc39764/mc40586	7
BP	GO:0051962	positive regulation of nervous system development	7/1704	20/16975	0.00242247	0.0137228	0.00988115	mc06982/mc12078/mc14748/mc16870/mc27451/mc39764/mc40586	7
BP	GO:1902679	negative regulation of RNA biosynthetic process	70/1704	499/16975	0.00246276	0.0138721	0.00998871	mc00748/mc00954/mc01729/mc01788/mc02741/mc04300/mc05864/mc06192/mc06203/mc06612/mc06968/mc07427/mc08820/mc08849/mc10650/mc11074/mc11531/mc11533/mc11857/mc13383/mc13522/mc13607/mc13669/mc14263/mc14264/mc14330/mc14379/mc15041/mc15098/mc15414/mc15423/mc15458/mc15940/mc16088/mc17432/mc17743/mc18363/mc20150/mc20297/mc20364/mc20948/mc21633/mc22867/mc23161/mc23504/mc24112/mc24131/mc26587/mc26588/mc28773…	70
BP	GO:1903507	negative regulation of nucleic acid-templated transcription	70/1704	499/16975	0.00246276	0.0138721	0.00998871	mc00748/mc00954/mc01729/mc01788/mc02741/mc04300/mc05864/mc06192/mc06203/mc06612/mc06968/mc07427/mc08820/mc08849/mc10650/mc11074/mc11531/mc11533/mc11857/mc13383/mc13522/mc13607/mc13669/mc14263/mc14264/mc14330/mc14379/mc15041/mc15098/mc15414/mc15423/mc15458/mc15940/mc16088/mc17432/mc17743/mc18363/mc20150/mc20297/mc20364/mc20948/mc21633/mc22867/mc23161/mc23504/mc24112/mc24131/mc26587/mc26588/mc28773…	70
BP	GO:0046165	alcohol biosynthetic process	19/1704	95/16975	0.00256433	0.0144036	0.0103714	mc00837/mc01851/mc02313/mc10412/mc12642/mc16659/mc19175/mc21977/mc25196/mc26321/mc26322/mc27099/mc31730/mc32957/mc34383/mc35072/mc37539/mc39256/mc40586	19
BP	GO:0016032	viral process	15/1704	68/16975	0.00262285	0.0146498	0.0105486	mc09996/mc18371/mc20860/mc21102/mc26603/mc27517/mc32608/mc36521/mc36908/mc38990/mc38996/mc39855/mc40683/mc40712/mc40880	15
BP	GO:0030004	cellular monovalent inorganic cation homeostasis	15/1704	68/16975	0.00262285	0.0146498	0.0105486	mc00790/mc01814/mc02118/mc05283/mc05285/mc05598/mc12893/mc13500/mc14644/mc23000/mc24823/mc29572/mc30828/mc34424/mc35031	15
BP	GO:0090421	embryonic meristem initiation	12/1704	49/16975	0.00273354	0.0151441	0.0109046	mc00877/mc01913/mc01914/mc03854/mc05411/mc11356/mc17593/mc25162/mc25163/mc34313/mc35123/mc35124	12
BP	GO:2000030	regulation of response to red or far red light	16/1704	75/16975	0.00275763	0.0151441	0.0109046	mc04530/mc06140/mc07087/mc07649/mc08179/mc13978/mc14638/mc14639/mc15923/mc16708/mc25983/mc27663/mc28877/mc31016/mc33267/mc39347	16
BP	GO:0032796	uropod organization	5/1704	11/16975	0.00278731	0.0151441	0.0109046	mc02476/mc08565/mc12700/mc22043/mc27146	5
BP	GO:0034461	uropod retraction	5/1704	11/16975	0.00278731	0.0151441	0.0109046	mc02476/mc08565/mc12700/mc22043/mc27146	5
BP	GO:0045490	pectin catabolic process	5/1704	11/16975	0.00278731	0.0151441	0.0109046	mc18004/mc20577/mc25899/mc33365/mc36098	5
BP	GO:0051316	attachment of spindle microtubules to kinetochore involved in meiotic chromosome segregation	5/1704	11/16975	0.00278731	0.0151441	0.0109046	mc26437/mc26565/mc26566/mc33072/mc37860	5
BP	GO:0051455	monopolar spindle attachment to meiosis I kinetochore	5/1704	11/16975	0.00278731	0.0151441	0.0109046	mc26437/mc26565/mc26566/mc33072/mc37860	5
BP	GO:1901959	positive regulation of cutin biosynthetic process	5/1704	11/16975	0.00278731	0.0151441	0.0109046	mc10412/mc16659/mc19175/mc37539/mc39256	5
BP	GO:1902047	polyamine transmembrane transport	5/1704	11/16975	0.00278731	0.0151441	0.0109046	mc16608/mc16646/mc26902/mc32286/mc39129	5
BP	GO:2000014	regulation of endosperm development	5/1704	11/16975	0.00278731	0.0151441	0.0109046	mc00049/mc03870/mc05422/mc11371/mc24428	5
BP	GO:0009826	unidimensional cell growth	68/1704	485/16975	0.0028516	0.0154513	0.0111258	mc00784/mc01823/mc02113/mc02226/mc02228/mc02433/mc02438/mc02448/mc02634/mc03970/mc05065/mc05203/mc05244/mc05361/mc05537/mc05641/mc05960/mc06179/mc06261/mc06453/mc06868/mc07027/mc07163/mc07347/mc08372/mc08523/mc08746/mc10065/mc10537/mc11628/mc11629/mc11630/mc11974/mc12770/mc12903/mc14182/mc14690/mc14810/mc15196/mc16427/mc16992/mc17344/mc17994/mc17995/mc19350/mc20662/mc21187/mc22120/mc22259/mc24176…	68
BP	GO:0006887	exocytosis	26/1704	147/16975	0.00298784	0.0161457	0.0116258	mc02175/mc02609/mc03364/mc03697/mc04562/mc07681/mc08772/mc09454/mc11192/mc11621/mc11861/mc12832/mc13601/mc17355/mc22186/mc23108/mc23960/mc26574/mc26891/mc28895/mc29832/mc30038/mc30982/mc32297/mc32641/mc38418	26
BP	GO:0035435	phosphate ion transmembrane transport	8/1704	26/16975	0.0030301	0.0163298	0.0117583	mc00096/mc01005/mc01691/mc13142/mc22624/mc24461/mc24592/mc34570	8
BP	GO:0042435	indole-containing compound biosynthetic process	15/1704	69/16975	0.00304675	0.0163753	0.0117911	mc24586/mc28511/mc28518/mc31266/mc31347/mc31348/mc31349/mc31350/mc31352/mc31354/mc31357/mc31360/mc31362/mc34502/mc34508	15
BP	GO:0000160	phosphorelay signal transduction system	32/1704	193/16975	0.00310728	0.0166557	0.011993	mc03569/mc09662/mc10514/mc11192/mc12174/mc12623/mc14624/mc16390/mc16515/mc16767/mc17378/mc17996/mc17997/mc20588/mc21662/mc21668/mc21961/mc26441/mc26489/mc27305/mc27412/mc27582/mc27802/mc33079/mc33120/mc36066/mc37093/mc38741/mc39200/mc39610/mc39718/mc39943	32
BP	GO:0034754	cellular hormone metabolic process	17/1704	83/16975	0.00324994	0.0173737	0.01251	mc02046/mc24750/mc28511/mc28518/mc31266/mc31347/mc31348/mc31349/mc31350/mc31352/mc31354/mc31357/mc31360/mc31362/mc34502/mc34508/mc40586	17
BP	GO:0036503	ERAD pathway	18/1704	90/16975	0.00328187	0.0174975	0.0125991	mc00739/mc01785/mc02084/mc03095/mc07746/mc10710/mc15829/mc20024/mc22305/mc24530/mc24531/mc24532/mc28340/mc28938/mc30576/mc31646/mc34960/mc38920	18
BP	GO:0031175	neuron projection development	14/1704	63/16975	0.00334218	0.0176671	0.0127213	mc06982/mc12078/mc13728/mc14748/mc16870/mc16993/mc23262/mc26971/mc27294/mc27451/mc32194/mc39597/mc39764/mc40586	14
BP	GO:0002164	larval development	6/1704	16/16975	0.0033439	0.0176671	0.0127213	mc03749/mc09847/mc09922/mc11239/mc19510/mc36700	6
BP	GO:0060562	epithelial tube morphogenesis	9/1704	32/16975	0.00334913	0.0176671	0.0127213	mc02323/mc03749/mc06371/mc09847/mc09922/mc11239/mc15261/mc19510/mc36700	9
BP	GO:0062013	positive regulation of small molecule metabolic process	9/1704	32/16975	0.00334913	0.0176671	0.0127213	mc00784/mc02113/mc02365/mc03619/mc08471/mc12903/mc22259/mc24821/mc35020	9
BP	GO:0000578	embryonic axis specification	10/1704	38/16975	0.00345343	0.0180739	0.0130142	mc01885/mc05228/mc29498/mc30774/mc34347/mc35136/mc35138/mc35139/mc35141/mc35143	10
BP	GO:0010232	vascular transport	10/1704	38/16975	0.00345343	0.0180739	0.0130142	mc09958/mc21069/mc26524/mc33153/mc39218/mc39220/mc39221/mc40837/mc40904/mc40907	10
BP	GO:0010233	phloem transport	10/1704	38/16975	0.00345343	0.0180739	0.0130142	mc09958/mc21069/mc26524/mc33153/mc39218/mc39220/mc39221/mc40837/mc40904/mc40907	10
BP	GO:0047484	regulation of response to osmotic stress	17/1704	84/16975	0.00370201	0.0193241	0.0139144	mc00055/mc01207/mc11958/mc11959/mc15679/mc17010/mc17822/mc20734/mc25693/mc26269/mc27282/mc28342/mc31642/mc32889/mc35901/mc39586/mc40790	17
BP	GO:0010647	positive regulation of cell communication	43/1704	283/16975	0.00383754	0.0199272	0.0143487	mc00055/mc00355/mc02067/mc03646/mc03749/mc04418/mc05194/mc06996/mc07444/mc07542/mc09744/mc09847/mc09922/mc11239/mc12958/mc12972/mc13581/mc14729/mc15422/mc16349/mc18029/mc18896/mc19510/mc20540/mc22322/mc22339/mc23085/mc24356/mc25972/mc26269/mc26860/mc28342/mc28997/mc30291/mc31642/mc32328/mc32889/mc33277/mc34095/mc36140/mc36700/mc37980/mc40586	43
BP	GO:0043900	regulation of multi-organism process	43/1704	283/16975	0.00383754	0.0199272	0.0143487	mc00055/mc01207/mc02609/mc03697/mc05244/mc05641/mc05960/mc06261/mc06453/mc06868/mc08772/mc10065/mc14182/mc14810/mc15196/mc16349/mc18029/mc19350/mc20540/mc21187/mc24031/mc24034/mc24035/mc26269/mc28342/mc28473/mc28511/mc29665/mc30163/mc30240/mc31347/mc31348/mc31349/mc31350/mc31352/mc31354/mc31357/mc31360/mc31642/mc32889/mc36140/mc37084/mc38341	43
BP	GO:0042692	muscle cell differentiation	8/1704	27/16975	0.00393258	0.0203677	0.0146659	mc00739/mc01785/mc02084/mc07746/mc22305/mc28938/mc34960/mc40586	8
BP	GO:0048812	neuron projection morphogenesis	9/1704	33/16975	0.00420172	0.0215934	0.0155484	mc12078/mc13728/mc16870/mc23262/mc26971/mc27451/mc32194/mc39764/mc40586	9
BP	GO:0048858	cell projection morphogenesis	9/1704	33/16975	0.00420172	0.0215934	0.0155484	mc12078/mc13728/mc16870/mc23262/mc26971/mc27451/mc32194/mc39764/mc40586	9
BP	GO:0120039	plasma membrane bounded cell projection morphogenesis	9/1704	33/16975	0.00420172	0.0215934	0.0155484	mc12078/mc13728/mc16870/mc23262/mc26971/mc27451/mc32194/mc39764/mc40586	9
BP	GO:0031347	regulation of defense response	61/1704	434/16975	0.00430639	0.0220744	0.0158948	mc00055/mc01207/mc02609/mc03697/mc04477/mc05864/mc06203/mc06968/mc07606/mc08772/mc08820/mc11074/mc12623/mc14263/mc14264/mc15414/mc16349/mc18029/mc18708/mc20028/mc20030/mc20032/mc20540/mc21961/mc24031/mc24034/mc24035/mc24131/mc25890/mc26269/mc26587/mc26588/mc28342/mc28511/mc28773/mc28849/mc30163/mc30399/mc31039/mc31347/mc31348/mc31349/mc31350/mc31352/mc31354/mc31357/mc31360/mc31642/mc32625/mc32626…	61
BP	GO:0015846	polyamine transport	5/1704	12/16975	0.00438597	0.0221408	0.0159426	mc16608/mc16646/mc26902/mc32286/mc39129	5
BP	GO:0031034	myosin filament assembly	5/1704	12/16975	0.00438597	0.0221408	0.0159426	mc02476/mc08565/mc12700/mc22043/mc27146	5
BP	GO:0031268	pseudopodium organization	5/1704	12/16975	0.00438597	0.0221408	0.0159426	mc02476/mc08565/mc12700/mc22043/mc27146	5
BP	GO:0034517	ribophagy	5/1704	12/16975	0.00438597	0.0221408	0.0159426	mc25046/mc28074/mc31908/mc39382/mc39399	5
BP	GO:0080142	regulation of salicylic acid biosynthetic process	5/1704	12/16975	0.00438597	0.0221408	0.0159426	mc24031/mc24034/mc24035/mc30163/mc38341	5
BP	GO:1901957	regulation of cutin biosynthetic process	5/1704	12/16975	0.00438597	0.0221408	0.0159426	mc10412/mc16659/mc19175/mc37539/mc39256	5
BP	GO:0006972	hyperosmotic response	22/1704	122/16975	0.00473235	0.0236568	0.0170342	mc00954/mc01729/mc02313/mc12642/mc15860/mc17822/mc19642/mc20062/mc20606/mc20734/mc21977/mc23632/mc24530/mc24531/mc24532/mc27099/mc28340/mc31646/mc34531/mc34898/mc35766/mc35901	22
BP	GO:0007187	G protein-coupled receptor signaling pathway, coupled to cyclic nucleotide second messenger	6/1704	17/16975	0.00473374	0.0236568	0.0170342	mc23960/mc26574/mc29832/mc30038/mc32641/mc38418	6
BP	GO:0007188	adenylate cyclase-modulating G protein-coupled receptor signaling pathway	6/1704	17/16975	0.00473374	0.0236568	0.0170342	mc23960/mc26574/mc29832/mc30038/mc32641/mc38418	6
BP	GO:0008593	regulation of Notch signaling pathway	6/1704	17/16975	0.00473374	0.0236568	0.0170342	mc03749/mc09847/mc09922/mc11239/mc19510/mc36700	6
BP	GO:0035967	cellular response to topologically incorrect protein	13/1704	59/16975	0.00497297	0.0247902	0.0178503	mc00739/mc01785/mc02084/mc03095/mc07746/mc10710/mc15829/mc20024/mc22305/mc28938/mc30576/mc34960/mc38920	13
BP	GO:0010026	trichome differentiation	31/1704	192/16975	0.00533641	0.0265356	0.0191071	mc02226/mc02228/mc02634/mc03970/mc04101/mc07376/mc08225/mc08372/mc08746/mc09483/mc10001/mc12770/mc15986/mc16517/mc17144/mc19564/mc20186/mc22120/mc24176/mc24937/mc25433/mc25833/mc25964/mc26054/mc29313/mc33206/mc33439/mc35647/mc38193/mc39189/mc40278	31
BP	GO:0010089	xylem development	17/1704	87/16975	0.00537843	0.0266781	0.0192097	mc04300/mc04705/mc07427/mc07808/mc11857/mc16423/mc17916/mc19486/mc20643/mc21057/mc23225/mc26945/mc29621/mc30878/mc32213/mc36000/mc36740	17
BP	GO:0007292	female gamete generation	12/1704	53/16975	0.00543187	0.0268098	0.0193045	mc03749/mc09847/mc09922/mc11239/mc19510/mc21662/mc26441/mc26565/mc26566/mc33079/mc36700/mc37860	12
BP	GO:2000031	regulation of salicylic acid mediated signaling pathway	12/1704	53/16975	0.00543187	0.0268098	0.0193045	mc00355/mc03646/mc07444/mc09744/mc12958/mc18896/mc22322/mc24356/mc25972/mc33277/mc34095/mc37980	12
BP	GO:0022008	neurogenesis	20/1704	109/16975	0.00563542	0.0277457	0.0199785	mc03749/mc06982/mc09847/mc09922/mc11239/mc12078/mc13728/mc14748/mc16870/mc16993/mc19510/mc23262/mc26971/mc27294/mc27451/mc32194/mc36700/mc39597/mc39764/mc40586	20
BP	GO:0002520	immune system development	13/1704	60/16975	0.00577824	0.0283788	0.0204343	mc02605/mc03749/mc08776/mc09847/mc09922/mc11239/mc19510/mc24212/mc26565/mc26566/mc36700/mc37860/mc38159	13
BP	GO:0009886	post-embryonic animal morphogenesis	7/1704	23/16975	0.00585934	0.0286361	0.0206195	mc02323/mc03749/mc09847/mc09922/mc11239/mc19510/mc36700	7
BP	GO:0031346	positive regulation of cell projection organization	7/1704	23/16975	0.00585934	0.0286361	0.0206195	mc06982/mc12078/mc14748/mc16870/mc27451/mc39764/mc40586	7
BP	GO:0002229	defense response to oomycetes	14/1704	67/16975	0.00599052	0.0292056	0.0210296	mc24031/mc24034/mc24035/mc28511/mc30163/mc31347/mc31348/mc31349/mc31350/mc31352/mc31354/mc31357/mc31360/mc38341	14
BP	GO:0030003	cellular cation homeostasis	33/1704	210/16975	0.0062975	0.0306273	0.0220534	mc00790/mc01814/mc02118/mc05283/mc05285/mc05598/mc09958/mc12303/mc12893/mc13500/mc14644/mc19581/mc21069/mc21606/mc23000/mc24823/mc25289/mc26524/mc26647/mc29572/mc30828/mc33153/mc34424/mc35031/mc35436/mc39218/mc39220/mc39221/mc40216/mc40586/mc40837/mc40904/mc40907	33
BP	GO:0010052	guard cell differentiation	8/1704	29/16975	0.00634463	0.0307815	0.0221644	mc01726/mc02226/mc02228/mc05044/mc08109/mc12770/mc22120/mc24937	8
BP	GO:0032990	cell part morphogenesis	9/1704	35/16975	0.0064065	0.0307821	0.0221648	mc12078/mc13728/mc16870/mc23262/mc26971/mc27451/mc32194/mc39764/mc40586	9
BP	GO:0042593	glucose homeostasis	9/1704	35/16975	0.0064065	0.0307821	0.0221648	mc01800/mc01801/mc10806/mc23709/mc24803/mc30909/mc34448/mc38723/mc40586	9
BP	GO:0052314	phytoalexin metabolic process	9/1704	35/16975	0.0064065	0.0307821	0.0221648	mc28511/mc31347/mc31348/mc31349/mc31350/mc31352/mc31354/mc31357/mc31360	9
BP	GO:0052315	phytoalexin biosynthetic process	9/1704	35/16975	0.0064065	0.0307821	0.0221648	mc28511/mc31347/mc31348/mc31349/mc31350/mc31352/mc31354/mc31357/mc31360	9
BP	GO:0002275	myeloid cell activation involved in immune response	6/1704	18/16975	0.00650553	0.0308471	0.0222116	mc23960/mc26574/mc29832/mc30038/mc32641/mc38418	6
BP	GO:0007613	memory	6/1704	18/16975	0.00650553	0.0308471	0.0222116	mc03749/mc09847/mc09922/mc11239/mc19510/mc36700	6
BP	GO:0036230	granulocyte activation	6/1704	18/16975	0.00650553	0.0308471	0.0222116	mc23960/mc26574/mc29832/mc30038/mc32641/mc38418	6
BP	GO:0006614	SRP-dependent cotranslational protein targeting to membrane	5/1704	13/16975	0.00654379	0.0308471	0.0222116	mc04277/mc13585/mc23090/mc26864/mc32324	5
BP	GO:0008277	regulation of G protein-coupled receptor signaling pathway	5/1704	13/16975	0.00654379	0.0308471	0.0222116	mc25196/mc26321/mc26322/mc31730/mc32957	5
BP	GO:0016079	synaptic vesicle exocytosis	5/1704	13/16975	0.00654379	0.0308471	0.0222116	mc02609/mc03697/mc08772/mc11621/mc17355	5
BP	GO:0017156	calcium-ion regulated exocytosis	5/1704	13/16975	0.00654379	0.0308471	0.0222116	mc02609/mc03697/mc08772/mc11621/mc17355	5
BP	GO:0080051	cutin transport	5/1704	13/16975	0.00654379	0.0308471	0.0222116	mc12448/mc21766/mc26299/mc32926/mc40118	5
BP	GO:0002009	morphogenesis of an epithelium	13/1704	61/16975	0.0066842	0.0314347	0.0226347	mc02323/mc03749/mc06371/mc09847/mc09922/mc11239/mc15261/mc19510/mc23932/mc29783/mc29987/mc36700/mc38445	13
BP	GO:0007010	cytoskeleton organization	62/1704	452/16975	0.006885	0.0323028	0.0232598	mc01823/mc02059/mc02433/mc02438/mc02448/mc02476/mc03104/mc03877/mc05203/mc05361/mc05435/mc05537/mc07163/mc07787/mc08523/mc08565/mc09185/mc09522/mc10008/mc10607/mc11386/mc11628/mc11629/mc11630/mc12178/mc12700/mc12979/mc12991/mc13451/mc13601/mc15693/mc16764/mc16765/mc17344/mc17565/mc19865/mc21113/mc22043/mc22350/mc22940/mc23108/mc24338/mc24762/mc25704/mc26565/mc26566/mc26739/mc27146/mc27584/mc27677…	62
BP	GO:0009640	photomorphogenesis	25/1704	149/16975	0.00712296	0.0333408	0.0240072	mc03014/mc04530/mc05065/mc06140/mc07087/mc07339/mc07347/mc07649/mc08179/mc09091/mc13978/mc14638/mc14639/mc15923/mc16708/mc23338/mc25983/mc27005/mc27663/mc28877/mc30322/mc31016/mc32164/mc33267/mc39347	25
BP	GO:0045944	positive regulation of transcription by RNA polymerase II	33/1704	212/16975	0.00726297	0.0339165	0.0244218	mc01863/mc02323/mc02405/mc02570/mc03738/mc04030/mc04699/mc05238/mc06050/mc07802/mc08305/mc08496/mc09828/mc11221/mc14096/mc18173/mc19013/mc19648/mc23623/mc24238/mc24395/mc24396/mc25481/mc29628/mc30251/mc30835/mc30885/mc32356/mc34369/mc36297/mc38129/mc38860/mc40209	33
BP	GO:0046189	phenol-containing compound biosynthetic process	10/1704	42/16975	0.00743065	0.0345378	0.0248691	mc13522/mc24031/mc24034/mc24035/mc24586/mc29572/mc30163/mc30828/mc33736/mc38341	10
BP	GO:0048859	formation of anatomical boundary	10/1704	42/16975	0.00743065	0.0345378	0.0248691	mc03749/mc09847/mc09922/mc10229/mc11239/mc11983/mc18137/mc19510/mc30116/mc36700	10
BP	GO:0055076	transition metal ion homeostasis	24/1704	142/16975	0.00754282	0.0349776	0.0251858	mc03282/mc03284/mc03286/mc03410/mc05053/mc08125/mc09335/mc09958/mc12303/mc19581/mc21069/mc21606/mc25289/mc26524/mc26647/mc33153/mc35436/mc39218/mc39220/mc39221/mc40216/mc40837/mc40904/mc40907	24
BP	GO:0010191	mucilage metabolic process	13/1704	62/16975	0.00769928	0.0355379	0.0255892	mc07376/mc09483/mc12373/mc12377/mc17144/mc21698/mc21701/mc25433/mc25964/mc26391/mc26393/mc33021/mc33023	13
BP	GO:2001023	regulation of response to drug	13/1704	62/16975	0.00769928	0.0355379	0.0255892	mc00355/mc03646/mc07444/mc09744/mc12958/mc18896/mc22322/mc24356/mc25972/mc33277/mc34095/mc37980/mc40586	13
BP	GO:1901615	organic hydroxy compound metabolic process	66/1704	489/16975	0.00778995	0.0358232	0.0257946	mc00837/mc00845/mc01851/mc02313/mc05172/mc07138/mc09129/mc10412/mc12642/mc13522/mc13600/mc16280/mc16659/mc19175/mc19202/mc19203/mc19204/mc20472/mc21353/mc21977/mc23107/mc24031/mc24034/mc24035/mc24586/mc25196/mc26321/mc26322/mc27099/mc29309/mc29572/mc30163/mc30548/mc30828/mc30836/mc31730/mc32310/mc32957/mc33736/mc34370/mc34383/mc35072/mc37392/mc37393/mc37394/mc37396/mc37399/mc37400/mc37402/mc37403…	66
BP	GO:0009403	toxin biosynthetic process	9/1704	36/16975	0.00779702	0.0358232	0.0257946	mc28511/mc31347/mc31348/mc31349/mc31350/mc31352/mc31354/mc31357/mc31360	9
BP	GO:0042770	signal transduction in response to DNA damage	8/1704	30/16975	0.00790528	0.0360712	0.0259733	mc04277/mc13585/mc23090/mc26565/mc26566/mc26864/mc32324/mc37860	8
BP	GO:0044347	cell wall polysaccharide catabolic process	8/1704	30/16975	0.00790528	0.0360712	0.0259733	mc07790/mc25986/mc28876/mc30892/mc31018/mc33263/mc34123/mc34132	8
BP	GO:1903792	negative regulation of anion transport	8/1704	30/16975	0.00790528	0.0360712	0.0259733	mc12078/mc13728/mc16870/mc23262/mc26971/mc27451/mc32194/mc39764	8
BP	GO:0042545	cell wall modification	19/1704	105/16975	0.00797608	0.0363112	0.0261461	mc13041/mc19559/mc20028/mc20030/mc20032/mc22470/mc24670/mc25890/mc28511/mc31347/mc31348/mc31349/mc31350/mc31352/mc31354/mc31357/mc31360/mc33381/mc35653	19
BP	GO:0048825	cotyledon development	21/1704	120/16975	0.00806746	0.0366436	0.0263854	mc02905/mc09035/mc10002/mc12448/mc15712/mc21106/mc21766/mc23759/mc25617/mc25733/mc25833/mc26299/mc29313/mc29329/mc30742/mc32926/mc33439/mc33544/mc36989/mc38654/mc40118	21
BP	GO:0000904	cell morphogenesis involved in differentiation	60/1704	439/16975	0.00835654	0.0378703	0.0272687	mc02226/mc02228/mc02634/mc03970/mc04101/mc05244/mc05641/mc05960/mc06261/mc06453/mc06868/mc07376/mc08225/mc08372/mc08746/mc09483/mc10001/mc10065/mc10537/mc12078/mc12770/mc13728/mc14182/mc14810/mc15196/mc15986/mc16517/mc16870/mc17144/mc19350/mc19564/mc20186/mc21187/mc22120/mc23262/mc24176/mc24937/mc25433/mc25833/mc25964/mc26054/mc26649/mc26971/mc27451/mc28473/mc29313/mc29665/mc30240/mc32194/mc32556…	60
BP	GO:0048653	anther development	20/1704	113/16975	0.00845347	0.0382227	0.0275225	mc03054/mc03112/mc09135/mc09198/mc10280/mc10284/mc10288/mc10289/mc10298/mc10299/mc10650/mc18363/mc23504/mc27597/mc28887/mc30607/mc36515/mc39006/mc39969/mc40261	20
BP	GO:0002274	myeloid leukocyte activation	6/1704	19/16975	0.00871312	0.0391306	0.0281762	mc23960/mc26574/mc29832/mc30038/mc32641/mc38418	6
BP	GO:0007611	learning or memory	6/1704	19/16975	0.00871312	0.0391306	0.0281762	mc03749/mc09847/mc09922/mc11239/mc19510/mc36700	6
BP	GO:0045493	xylan catabolic process	6/1704	19/16975	0.00871312	0.0391306	0.0281762	mc25986/mc28876/mc31018/mc33263/mc34123/mc34132	6
BP	GO:0048729	tissue morphogenesis	13/1704	63/16975	0.00883212	0.0395638	0.0284881	mc02323/mc03749/mc06371/mc09847/mc09922/mc11239/mc15261/mc19510/mc23932/mc29783/mc29987/mc36700/mc38445	13
BP	GO:0006885	regulation of pH	15/1704	77/16975	0.00886911	0.0395638	0.0284881	mc00790/mc01814/mc02118/mc05283/mc05285/mc05598/mc12893/mc13500/mc14644/mc23000/mc24823/mc29572/mc30828/mc34424/mc35031	15
BP	GO:0010214	seed coat development	15/1704	77/16975	0.00886911	0.0395638	0.0284881	mc07376/mc09483/mc12373/mc12377/mc17144/mc21698/mc21701/mc25433/mc25964/mc26391/mc26393/mc29572/mc30828/mc33021/mc33023	15
BP	GO:0000395	mRNA 5'-splice site recognition	5/1704	14/16975	0.00934844	0.0414027	0.0298122	mc16061/mc16062/mc20263/mc26495/mc33127	5
BP	GO:0043280	positive regulation of cysteine-type endopeptidase activity involved in apoptotic process	5/1704	14/16975	0.00934844	0.0414027	0.0298122	mc04277/mc13585/mc23090/mc26864/mc32324	5
BP	GO:2001056	positive regulation of cysteine-type endopeptidase activity	5/1704	14/16975	0.00934844	0.0414027	0.0298122	mc04277/mc13585/mc23090/mc26864/mc32324	5
BP	GO:0007264	small GTPase mediated signal transduction	9/1704	37/16975	0.00940593	0.0414027	0.0298122	mc12078/mc13728/mc16870/mc23262/mc26971/mc27451/mc32194/mc39764/mc40586	9
BP	GO:0009625	response to insect	9/1704	37/16975	0.00940593	0.0414027	0.0298122	mc28511/mc31347/mc31348/mc31349/mc31350/mc31352/mc31354/mc31357/mc31360	9
BP	GO:0048477	oogenesis	9/1704	37/16975	0.00940593	0.0414027	0.0298122	mc03749/mc09847/mc09922/mc11239/mc19510/mc26565/mc26566/mc36700/mc37860	9
BP	GO:0045727	positive regulation of translation	11/1704	50/16975	0.00951278	0.0417808	0.0300845	mc00193/mc01498/mc04277/mc13585/mc22549/mc23090/mc24527/mc26864/mc32324/mc32809/mc34785	11
BP	GO:0001578	microtubule bundle formation	7/1704	25/16975	0.00961704	0.0420535	0.0302808	mc03104/mc09185/mc12178/mc16764/mc16765/mc27584/mc39946	7
BP	GO:0010720	positive regulation of cell development	7/1704	25/16975	0.00961704	0.0420535	0.0302808	mc06982/mc12078/mc14748/mc16870/mc27451/mc39764/mc40586	7
BP	GO:0120255	olefinic compound biosynthetic process	16/1704	86/16975	0.0109291	0.0476863	0.0343368	mc00837/mc01851/mc02313/mc10412/mc12642/mc16659/mc19175/mc21977/mc27099/mc33736/mc34383/mc34646/mc35072/mc37539/mc39256/mc40762	16
BP	GO:0006833	water transport	15/1704	79/16975	0.0112181	0.0488403	0.0351677	mc08346/mc10412/mc10718/mc11133/mc16659/mc18925/mc18981/mc19175/mc19673/mc23591/mc25258/mc37539/mc38900/mc39256/mc40177	15
BP	GO:0006379	mRNA cleavage	9/1704	38/16975	0.0112533	0.0488867	0.0352011	mc11958/mc11959/mc12121/mc16825/mc17010/mc27282/mc27521/mc39586/mc39860	9
BP	GO:0050890	cognition	6/1704	20/16975	0.0114091	0.0493488	0.0355338	mc03749/mc09847/mc09922/mc11239/mc19510/mc36700	6
BP	GO:1905177	tracheary element differentiation	6/1704	20/16975	0.0114091	0.0493488	0.0355338	mc04705/mc06050/mc07808/mc14096/mc29621/mc30878	6
BP	GO:0090150	establishment of protein localization to membrane	13/1704	65/16975	0.0114867	0.0495768	0.035698	mc04277/mc12078/mc13585/mc13728/mc16870/mc23090/mc23262/mc26864/mc26971/mc27451/mc32194/mc32324/mc39764	13
CC	GO:0022627	cytosolic small ribosomal subunit	29/1694	81/16891	3.9e-10	9.99e-08	7.02e-08	mc00193/mc00236/mc01498/mc02513/mc04277/mc04451/mc07575/mc08597/mc10810/mc13585/mc13956/mc17655/mc18500/mc21433/mc22549/mc23090/mc24281/mc24527/mc24560/mc26864/mc28816/mc31075/mc32324/mc32809/mc34785/mc35642/mc38080/mc38712/mc40515	29
CC	GO:0015935	small ribosomal subunit	29/1694	95/16891	2.55e-08	3.26e-06	2.29e-06	mc00193/mc00236/mc01498/mc02513/mc04277/mc04451/mc07575/mc08597/mc10810/mc13585/mc13956/mc17655/mc18500/mc21433/mc22549/mc23090/mc24281/mc24527/mc24560/mc26864/mc28816/mc31075/mc32324/mc32809/mc34785/mc35642/mc38080/mc38712/mc40515	29
CC	GO:0033177	proton-transporting two-sector ATPase complex, proton-transporting domain	12/1694	22/16891	2.47e-07	2.11e-05	1.48e-05	mc00790/mc01814/mc02118/mc02588/mc08678/mc12893/mc13500/mc23000/mc24823/mc34424/mc35031/mc38145	12
CC	GO:0000220	vacuolar proton-transporting V-type ATPase, V0 domain	9/1694	13/16891	4.94e-07	2.53e-05	1.78e-05	mc00790/mc01814/mc02118/mc12893/mc13500/mc23000/mc24823/mc34424/mc35031	9
CC	GO:0033179	proton-transporting V-type ATPase, V0 domain	9/1694	13/16891	4.94e-07	2.53e-05	1.78e-05	mc00790/mc01814/mc02118/mc12893/mc13500/mc23000/mc24823/mc34424/mc35031	9
CC	GO:0016469	proton-transporting two-sector ATPase complex	16/1694	42/16891	1.29e-06	5.49e-05	3.86e-05	mc00790/mc01814/mc02118/mc02588/mc04963/mc08043/mc08678/mc12893/mc13500/mc23000/mc24823/mc29405/mc30654/mc34424/mc35031/mc38145	16
CC	GO:0005844	polysome	38/1694	176/16891	4.03e-06	0.000147445	0.000103672	mc00236/mc02588/mc02818/mc04277/mc04451/mc04729/mc07575/mc07835/mc08678/mc08925/mc10112/mc10228/mc10810/mc13585/mc13956/mc17655/mc18142/mc18147/mc18500/mc19299/mc21222/mc21433/mc23090/mc24560/mc26864/mc28816/mc29090/mc29601/mc30368/mc30852/mc31075/mc31723/mc32324/mc35642/mc36269/mc38145/mc38712/mc40515	38
CC	GO:0022626	cytosolic ribosome	61/1694	346/16891	8.56e-06	0.000273976	0.00019264	mc00193/mc00236/mc01199/mc01498/mc01577/mc02513/mc02588/mc04277/mc04451/mc05246/mc05639/mc06180/mc07575/mc07948/mc08597/mc08678/mc09769/mc10112/mc10228/mc10810/mc11142/mc13585/mc13956/mc15986/mc17655/mc18142/mc18147/mc18500/mc19299/mc19564/mc20186/mc20404/mc21222/mc21433/mc21597/mc22549/mc23090/mc24281/mc24527/mc24560/mc26054/mc26636/mc26864/mc28816/mc29669/mc30236/mc31075/mc31723/mc32324/mc32576…	61
CC	GO:0032588	trans-Golgi network membrane	18/1694	59/16891	1.12e-05	0.000300906	0.000211574	mc00718/mc02229/mc09697/mc10669/mc11513/mc12766/mc13601/mc15504/mc17450/mc18404/mc19726/mc20900/mc22118/mc23108/mc23532/mc35355/mc36551/mc38974	18
CC	GO:0036513	Derlin-1 retrotranslocation complex	11/1694	25/16891	1.18e-05	0.000300906	0.000211574	mc00739/mc01785/mc02084/mc03095/mc07746/mc15829/mc20024/mc22305/mc28938/mc30576/mc34960	11
CC	GO:0042788	polysomal ribosome	30/1694	135/16891	2.25e-05	0.000524164	0.000368553	mc00236/mc02588/mc04277/mc04451/mc07575/mc08678/mc10112/mc10228/mc10810/mc13585/mc13956/mc17655/mc18142/mc18147/mc18500/mc19299/mc21222/mc21433/mc23090/mc24560/mc26864/mc28816/mc31075/mc31723/mc32324/mc35642/mc36269/mc38145/mc38712/mc40515	30
CC	GO:0070772	PAS complex	7/1694	12/16891	5.07e-05	0.00108068	0.000759855	mc05179/mc06198/mc06984/mc14744/mc15418/mc28783/mc31112	7
CC	GO:0045273	respiratory chain complex II	9/1694	21/16891	9.63e-05	0.0015094	0.0010613	mc00259/mc00267/mc00273/mc00274/mc00277/mc03288/mc03289/mc03408/mc37401	9
CC	GO:0045281	succinate dehydrogenase complex	9/1694	21/16891	9.63e-05	0.0015094	0.0010613	mc00259/mc00267/mc00273/mc00274/mc00277/mc03288/mc03289/mc03408/mc37401	9
CC	GO:0000329	fungal-type vacuole membrane	7/1694	13/16891	0.000100234	0.0015094	0.0010613	mc05179/mc06198/mc06984/mc14744/mc15418/mc28783/mc31112	7
CC	GO:0005930	axoneme	7/1694	13/16891	0.000100234	0.0015094	0.0010613	mc03104/mc09185/mc12178/mc16764/mc16765/mc27584/mc39946	7
CC	GO:0097014	ciliary plasm	7/1694	13/16891	0.000100234	0.0015094	0.0010613	mc03104/mc09185/mc12178/mc16764/mc16765/mc27584/mc39946	7
CC	GO:0005766	primary lysosome	6/1694	10/16891	0.000148303	0.00189828	0.00133472	mc23960/mc26574/mc29832/mc30038/mc32641/mc38418	6
CC	GO:0042582	azurophil granule	6/1694	10/16891	0.000148303	0.00189828	0.00133472	mc23960/mc26574/mc29832/mc30038/mc32641/mc38418	6
CC	GO:0043202	lysosomal lumen	6/1694	10/16891	0.000148303	0.00189828	0.00133472	mc23960/mc26574/mc29832/mc30038/mc32641/mc38418	6
CC	GO:0000325	plant-type vacuole	50/1694	298/16891	0.000191701	0.00233692	0.00164315	mc00784/mc01708/mc01800/mc01801/mc02113/mc03054/mc03112/mc08346/mc09135/mc09198/mc09996/mc10280/mc10284/mc10288/mc10289/mc10298/mc10299/mc10909/mc12903/mc12944/mc18371/mc18740/mc18981/mc20860/mc21102/mc22259/mc23843/mc24803/mc24821/mc25258/mc27517/mc27597/mc28887/mc28967/mc29572/mc30267/mc30607/mc30828/mc30909/mc34448/mc34555/mc34878/mc35020/mc36521/mc36908/mc38990/mc38996/mc39855/mc39969/mc40177	50
CC	GO:0033176	proton-transporting V-type ATPase complex	9/1694	23/16891	0.000222313	0.00258691	0.00181892	mc00790/mc01814/mc02118/mc12893/mc13500/mc23000/mc24823/mc34424/mc35031	9
CC	GO:0099568	cytoplasmic region	40/1694	227/16891	0.000290709	0.00276857	0.00194665	mc00784/mc02059/mc02113/mc02476/mc02609/mc02980/mc03104/mc03697/mc03877/mc05361/mc05435/mc05537/mc06167/mc07045/mc08565/mc08772/mc09185/mc11386/mc11621/mc12178/mc12700/mc12903/mc12979/mc14677/mc16764/mc16765/mc17355/mc17565/mc22043/mc22259/mc22350/mc23221/mc24762/mc24821/mc27146/mc27584/mc30481/mc32217/mc35020/mc39946	40
CC	GO:0000782	telomere cap complex	7/1694	15/16891	0.000313627	0.00276857	0.00194665	mc03569/mc03659/mc09662/mc09761/mc11166/mc17378/mc18955	7
CC	GO:0000783	nuclear telomere cap complex	7/1694	15/16891	0.000313627	0.00276857	0.00194665	mc03569/mc03659/mc09662/mc09761/mc11166/mc17378/mc18955	7
CC	GO:0005942	phosphatidylinositol 3-kinase complex	7/1694	15/16891	0.000313627	0.00276857	0.00194665	mc05179/mc06198/mc06984/mc14744/mc15418/mc28783/mc31112	7
CC	GO:0032838	plasma membrane bounded cell projection cytoplasm	7/1694	15/16891	0.000313627	0.00276857	0.00194665	mc03104/mc09185/mc12178/mc16764/mc16765/mc27584/mc39946	7
CC	GO:0035032	phosphatidylinositol 3-kinase complex, class III	7/1694	15/16891	0.000313627	0.00276857	0.00194665	mc05179/mc06198/mc06984/mc14744/mc15418/mc28783/mc31112	7
CC	GO:0140445	chromosome, telomeric repeat region	7/1694	15/16891	0.000313627	0.00276857	0.00194665	mc03569/mc03659/mc09662/mc09761/mc11166/mc17378/mc18955	7
CC	GO:0099081	supramolecular polymer	40/1694	232/16891	0.000459462	0.00379427	0.00266784	mc00739/mc01785/mc02059/mc02084/mc02476/mc03877/mc05361/mc05435/mc05537/mc06167/mc07045/mc07746/mc08565/mc10008/mc11386/mc11628/mc11629/mc11630/mc12700/mc12979/mc13451/mc14677/mc15693/mc17344/mc17565/mc19865/mc21113/mc22043/mc22305/mc22350/mc22940/mc24762/mc25704/mc26739/mc27146/mc28321/mc28938/mc32453/mc33579/mc34960	40
CC	GO:0099512	supramolecular fiber	40/1694	232/16891	0.000459462	0.00379427	0.00266784	mc00739/mc01785/mc02059/mc02084/mc02476/mc03877/mc05361/mc05435/mc05537/mc06167/mc07045/mc07746/mc08565/mc10008/mc11386/mc11628/mc11629/mc11630/mc12700/mc12979/mc13451/mc14677/mc15693/mc17344/mc17565/mc19865/mc21113/mc22043/mc22305/mc22350/mc22940/mc24762/mc25704/mc26739/mc27146/mc28321/mc28938/mc32453/mc33579/mc34960	40
CC	GO:0000324	fungal-type vacuole	7/1694	17/16891	0.000791374	0.00633099	0.00445148	mc05179/mc06198/mc06984/mc14744/mc15418/mc28783/mc31112	7
CC	GO:0005667	transcription regulator complex	34/1694	195/16891	0.000966009	0.00749389	0.00526914	mc00563/mc02570/mc03738/mc04030/mc04699/mc05238/mc06050/mc07802/mc08305/mc09828/mc11221/mc11531/mc11533/mc13752/mc14096/mc17432/mc18173/mc19013/mc19465/mc22224/mc22226/mc24238/mc24395/mc24396/mc29628/mc30251/mc30885/mc32356/mc34026/mc34291/mc36297/mc38129/mc40209/mc40821	34
CC	GO:0009505	plant-type cell wall	55/1694	360/16891	0.00102029	0.00750366	0.00527601	mc01625/mc02112/mc02226/mc02228/mc03054/mc03112/mc07790/mc09065/mc09135/mc09198/mc09622/mc10280/mc10284/mc10288/mc10289/mc10298/mc10299/mc10412/mc12770/mc13884/mc13885/mc14330/mc14616/mc16659/mc17817/mc19131/mc19175/mc19446/mc21092/mc22120/mc22984/mc23238/mc23423/mc24937/mc25986/mc26760/mc26957/mc27597/mc28876/mc28887/mc29267/mc30506/mc30607/mc30892/mc31018/mc32099/mc32207/mc32418/mc33263/mc36074…	55
CC	GO:0044391	ribosomal subunit	49/1694	312/16891	0.00102589	0.00750366	0.00527601	mc00193/mc00236/mc01498/mc02513/mc04277/mc04451/mc05246/mc05639/mc06180/mc07575/mc07948/mc08597/mc09769/mc10112/mc10228/mc10810/mc11142/mc13585/mc13956/mc17655/mc18142/mc18147/mc18500/mc19299/mc20404/mc21222/mc21433/mc21597/mc22549/mc23090/mc24281/mc24527/mc24560/mc26636/mc26864/mc28816/mc29669/mc30236/mc31075/mc31723/mc32324/mc32576/mc32809/mc34785/mc35642/mc36269/mc38080/mc38712/mc40515	49
CC	GO:0005840	ribosome	61/1694	411/16891	0.0011698	0.00797342	0.00560631	mc00193/mc00236/mc01199/mc01498/mc01577/mc02513/mc02588/mc04277/mc04451/mc05246/mc05639/mc06180/mc07575/mc07948/mc08597/mc08678/mc09769/mc10112/mc10228/mc10810/mc11142/mc13585/mc13956/mc15986/mc17655/mc18142/mc18147/mc18500/mc19299/mc19564/mc20186/mc20404/mc21222/mc21433/mc21597/mc22549/mc23090/mc24281/mc24527/mc24560/mc26054/mc26636/mc26864/mc28816/mc29669/mc30236/mc31075/mc31723/mc32324/mc32576…	61
CC	GO:0000120	RNA polymerase I transcription regulator complex	7/1694	18/16891	0.00118355	0.00797342	0.00560631	mc00563/mc13752/mc19465/mc22224/mc22226/mc34291/mc40821	7
CC	GO:0005753	mitochondrial proton-transporting ATP synthase complex	7/1694	18/16891	0.00118355	0.00797342	0.00560631	mc02588/mc04963/mc08043/mc08678/mc29405/mc30654/mc38145	7
CC	GO:0099080	supramolecular complex	63/1694	431/16891	0.00144084	0.00945783	0.00665004	mc00739/mc00877/mc01785/mc01913/mc01914/mc02059/mc02084/mc02316/mc02476/mc03877/mc05361/mc05435/mc05537/mc06167/mc07045/mc07746/mc08565/mc10008/mc11386/mc11628/mc11629/mc11630/mc12267/mc12700/mc12979/mc13451/mc14677/mc15693/mc17344/mc17565/mc19865/mc21113/mc21573/mc22043/mc22305/mc22350/mc22940/mc24762/mc25046/mc25704/mc26597/mc26739/mc27095/mc27146/mc28074/mc28321/mc28938/mc31908/mc32453/mc32610…	63
CC	GO:0016460	myosin II complex	5/1694	10/16891	0.00164974	0.0105584	0.00742385	mc02476/mc08565/mc12700/mc22043/mc27146	5
CC	GO:0045259	proton-transporting ATP synthase complex	7/1694	19/16891	0.00171301	0.0106959	0.00752053	mc02588/mc04963/mc08043/mc08678/mc29405/mc30654/mc38145	7
CC	GO:0000322	storage vacuole	10/1694	35/16891	0.00175866	0.0107194	0.0075371	mc05179/mc06198/mc06984/mc10909/mc14744/mc15418/mc18740/mc23843/mc28783/mc31112	10
CC	GO:0005615	extracellular space	23/1694	121/16891	0.00193577	0.0115246	0.00810324	mc03054/mc03112/mc09135/mc09198/mc10280/mc10284/mc10288/mc10289/mc10298/mc10299/mc13884/mc13885/mc23423/mc23960/mc26574/mc27597/mc28887/mc29832/mc30038/mc30607/mc32641/mc38418/mc39969	23
CC	GO:0005775	vacuolar lumen	6/1694	15/16891	0.0022711	0.0132137	0.00929088	mc23960/mc26574/mc29832/mc30038/mc32641/mc38418	6
CC	GO:0001891	phagocytic cup	5/1694	11/16891	0.00277576	0.0148041	0.0104091	mc02476/mc08565/mc12700/mc22043/mc27146	5
CC	GO:0001931	uropod	5/1694	11/16891	0.00277576	0.0148041	0.0104091	mc02476/mc08565/mc12700/mc22043/mc27146	5
CC	GO:0031254	cell trailing edge	5/1694	11/16891	0.00277576	0.0148041	0.0104091	mc02476/mc08565/mc12700/mc22043/mc27146	5
CC	GO:1990753	equatorial cell cortex	5/1694	11/16891	0.00277576	0.0148041	0.0104091	mc02476/mc08565/mc12700/mc22043/mc27146	5
CC	GO:0030667	secretory granule membrane	6/1694	16/16891	0.00332811	0.0173877	0.0122257	mc23960/mc26574/mc29832/mc30038/mc32641/mc38418	6
CC	GO:0098852	lytic vacuole membrane	13/1694	57/16891	0.00360288	0.0184468	0.0129704	mc05179/mc06198/mc06984/mc14744/mc15418/mc23960/mc26574/mc28783/mc29832/mc30038/mc31112/mc32641/mc38418	13
CC	GO:0140534	endoplasmic reticulum protein-containing complex	19/1694	99/16891	0.0041073	0.020617	0.0144964	mc00739/mc01785/mc02084/mc03095/mc07746/mc10529/mc15829/mc16504/mc20024/mc22305/mc24530/mc24531/mc24532/mc28340/mc28938/mc30576/mc31646/mc34960/mc40976	19
CC	GO:1990861	Ubp3-Bre5 deubiquitination complex	5/1694	12/16891	0.00436816	0.0215048	0.0151206	mc25046/mc28074/mc31908/mc39382/mc39399	5
CC	GO:0010005	cortical microtubule, transverse to long axis	6/1694	17/16891	0.00471179	0.0227588	0.0160023	mc03877/mc05361/mc05435/mc05537/mc11386/mc17565	6
CC	GO:0030141	secretory granule	9/1694	34/16891	0.0051825	0.0245689	0.017275	mc23960/mc26565/mc26566/mc26574/mc29832/mc30038/mc32641/mc37860/mc38418	9
CC	GO:0043292	contractile fiber	7/1694	23/16891	0.00582934	0.0271329	0.0190778	mc00739/mc01785/mc02084/mc07746/mc22305/mc28938/mc34960	7
CC	GO:0000153	cytoplasmic ubiquitin ligase complex	5/1694	13/16891	0.00651775	0.028768	0.0202275	mc24530/mc24531/mc24532/mc28340/mc31646	5
CC	GO:0043076	megasporocyte nucleus	5/1694	13/16891	0.00651775	0.028768	0.0202275	mc03756/mc09856/mc16403/mc19043/mc20624	5
CC	GO:0043078	polar nucleus	5/1694	13/16891	0.00651775	0.028768	0.0202275	mc03756/mc09856/mc16403/mc19043/mc20624	5
CC	GO:0005938	cell cortex	33/1694	212/16891	0.00716405	0.0310847	0.0218564	mc00784/mc02059/mc02113/mc02476/mc02609/mc02980/mc03697/mc03877/mc05361/mc05435/mc05537/mc06167/mc07045/mc08565/mc08772/mc11386/mc11621/mc12700/mc12903/mc12979/mc14677/mc17355/mc17565/mc22043/mc22259/mc22350/mc23221/mc24762/mc24821/mc27146/mc30481/mc32217/mc35020	33
CC	GO:0055028	cortical microtubule	10/1694	42/16891	0.00738284	0.0315001	0.0221485	mc02059/mc03877/mc05361/mc05435/mc05537/mc11386/mc12979/mc17565/mc22350/mc24762	10
CC	GO:0045335	phagocytic vesicle	5/1694	14/16891	0.00931199	0.0385139	0.0270801	mc02476/mc08565/mc12700/mc22043/mc27146	5
CC	GO:0000323	lytic vacuole	27/1694	168/16891	0.00932759	0.0385139	0.0270801	mc03054/mc03112/mc05179/mc06198/mc06984/mc09135/mc09198/mc10280/mc10284/mc10288/mc10289/mc10298/mc10299/mc14744/mc15418/mc23960/mc26574/mc27597/mc28783/mc28887/mc29832/mc30038/mc30607/mc31112/mc32641/mc38418/mc39969	27
CC	GO:0009705	plant-type vacuole membrane	30/1694	194/16891	0.0109358	0.0444375	0.0312451	mc00784/mc01708/mc01800/mc01801/mc02113/mc08346/mc09996/mc12903/mc18371/mc18981/mc20860/mc21102/mc22259/mc24803/mc24821/mc25258/mc27517/mc29572/mc30828/mc30909/mc34448/mc34555/mc34878/mc35020/mc36521/mc36908/mc38990/mc38996/mc39855/mc40177	30
CC	GO:0005849	mRNA cleavage factor complex	9/1694	38/16891	0.011188	0.0447518	0.0314661	mc11958/mc11959/mc12121/mc16825/mc17010/mc27282/mc27521/mc39586/mc39860	9
CC	GO:0000781	chromosome, telomeric region	10/1694	45/16891	0.0121536	0.0478506	0.033645	mc03569/mc03659/mc09662/mc09761/mc11166/mc17378/mc18955/mc26565/mc26566/mc37860	10
CC	GO:0031902	late endosome membrane	11/1694	52/16891	0.0127015	0.0478506	0.033645	mc00718/mc02229/mc04791/mc09697/mc11513/mc12766/mc17450/mc22118/mc29557/mc30818/mc35355	11
CC	GO:0099738	cell cortex region	5/1694	15/16891	0.0128324	0.0478506	0.033645	mc02476/mc08565/mc12700/mc22043/mc27146	5
CC	GO:0005655	nucleolar ribonuclease P complex	4/1694	10/16891	0.0128972	0.0478506	0.033645	mc03242/mc28422/mc28423/mc31552	4
CC	GO:0045171	intercellular bridge	4/1694	10/16891	0.0128972	0.0478506	0.033645	mc02059/mc12979/mc22350/mc24762	4
MF	GO:0000981	DNA-binding transcription factor activity, RNA polymerase II-specific	82/1518	288/14722	3.07e-18	1.28e-15	9.75e-16	mc00355/mc01863/mc01985/mc02405/mc02570/mc03646/mc03738/mc04030/mc04699/mc05001/mc05238/mc05687/mc06050/mc06501/mc07029/mc07376/mc07444/mc07802/mc08068/mc08305/mc08496/mc09483/mc09744/mc09828/mc11221/mc12472/mc12623/mc12958/mc13007/mc13022/mc13522/mc14096/mc14330/mc14688/mc17144/mc17912/mc18132/mc18173/mc18896/mc19013/mc19582/mc19584/mc19648/mc21786/mc21961/mc22322/mc22457/mc23623/mc24238/mc24356…	82
MF	GO:0000977	RNA polymerase II transcription regulatory region sequence-specific DNA binding	40/1518	122/14722	1.14e-11	2.37e-09	1.81e-09	mc01531/mc01863/mc02570/mc03738/mc04030/mc04699/mc05238/mc05784/mc06050/mc06140/mc06656/mc07087/mc07802/mc08305/mc09828/mc11221/mc11531/mc11533/mc13978/mc14096/mc14638/mc14639/mc17432/mc18173/mc19013/mc24238/mc24395/mc24396/mc25972/mc29628/mc30251/mc30835/mc30885/mc32356/mc33277/mc34026/mc34369/mc36297/mc38129/mc40209	40
MF	GO:0001216	DNA-binding transcription activator activity	32/1518	93/14722	3.19e-10	3.33e-08	2.54e-08	mc01863/mc02405/mc02570/mc03738/mc04030/mc04699/mc05238/mc06050/mc07802/mc08305/mc08496/mc09828/mc11221/mc14096/mc18173/mc19013/mc19648/mc23623/mc24238/mc24395/mc24396/mc25481/mc29628/mc30251/mc30835/mc30885/mc32356/mc34369/mc36297/mc38129/mc38860/mc40209	32
MF	GO:0001228	DNA-binding transcription activator activity, RNA polymerase II-specific	32/1518	93/14722	3.19e-10	3.33e-08	2.54e-08	mc01863/mc02405/mc02570/mc03738/mc04030/mc04699/mc05238/mc06050/mc07802/mc08305/mc08496/mc09828/mc11221/mc14096/mc18173/mc19013/mc19648/mc23623/mc24238/mc24395/mc24396/mc25481/mc29628/mc30251/mc30835/mc30885/mc32356/mc34369/mc36297/mc38129/mc38860/mc40209	32
MF	GO:0004478	methionine adenosyltransferase activity	11/1518	13/14722	8.68e-10	7.24e-08	5.52e-08	mc08292/mc15764/mc17947/mc19950/mc25291/mc25794/mc26649/mc29274/mc32556/mc33489/mc40220	11
MF	GO:0001085	RNA polymerase II transcription factor binding	27/1518	79/14722	9.06e-09	6.3e-07	4.8e-07	mc02570/mc03738/mc04030/mc04699/mc05238/mc06050/mc07802/mc08305/mc09828/mc11221/mc11531/mc11533/mc14096/mc17432/mc18173/mc19013/mc24238/mc24395/mc24396/mc29628/mc30251/mc30885/mc32356/mc34026/mc36297/mc38129/mc40209	27
MF	GO:0004190	aspartic-type endopeptidase activity	27/1518	85/14722	5.3e-08	2.76e-06	2.11e-06	mc09583/mc19202/mc19203/mc19204/mc19613/mc20383/mc37392/mc37393/mc37394/mc37395/mc37396/mc37399/mc37400/mc37402/mc37403/mc37408/mc37410/mc37435/mc37437/mc37438/mc37439/mc37442/mc37454/mc37485/mc37669/mc37670/mc37680	27
MF	GO:0070001	aspartic-type peptidase activity	27/1518	85/14722	5.3e-08	2.76e-06	2.11e-06	mc09583/mc19202/mc19203/mc19204/mc19613/mc20383/mc37392/mc37393/mc37394/mc37395/mc37396/mc37399/mc37400/mc37402/mc37403/mc37408/mc37410/mc37435/mc37437/mc37438/mc37439/mc37442/mc37454/mc37485/mc37669/mc37670/mc37680	27
MF	GO:0000976	transcription regulatory region sequence-specific DNA binding	46/1518	203/14722	2e-07	9.26e-06	7.06e-06	mc01531/mc01863/mc02570/mc03738/mc04030/mc04699/mc05238/mc05784/mc06050/mc06140/mc06656/mc07087/mc07802/mc08305/mc09828/mc11221/mc11531/mc11533/mc13041/mc13752/mc13978/mc14096/mc14638/mc14639/mc17432/mc18173/mc19013/mc22224/mc22226/mc22470/mc24238/mc24395/mc24396/mc24670/mc25972/mc29628/mc30251/mc30835/mc30885/mc32356/mc33277/mc34026/mc34369/mc36297/mc38129/mc40209	46
MF	GO:1990837	sequence-specific double-stranded DNA binding	51/1518	249/14722	1.22e-06	5.08e-05	3.87e-05	mc01531/mc01863/mc02570/mc03738/mc04030/mc04699/mc05238/mc05784/mc06050/mc06140/mc06656/mc07087/mc07802/mc08305/mc09828/mc10650/mc11221/mc11531/mc11533/mc13041/mc13752/mc13978/mc14096/mc14638/mc14639/mc17432/mc18173/mc18363/mc19013/mc22224/mc22226/mc22470/mc23504/mc24238/mc24395/mc24396/mc24670/mc25972/mc29628/mc30251/mc30835/mc30885/mc32356/mc33277/mc34026/mc34369/mc36297/mc36515/mc38129/mc39006…	51
MF	GO:0000104	succinate dehydrogenase activity	9/1518	14/14722	1.59e-06	6.04e-05	4.6e-05	mc00259/mc00267/mc00273/mc00274/mc00277/mc03288/mc03289/mc03408/mc37401	9
MF	GO:0008327	methyl-CpG binding	10/1518	19/14722	5.08e-06	0.000176604	0.000134632	mc06767/mc06828/mc14577/mc14852/mc14854/mc14891/mc25120/mc28124/mc31833/mc40055	10
MF	GO:0016307	phosphatidylinositol phosphate kinase activity	11/1518	23/14722	5.64e-06	0.000180951	0.000137946	mc00430/mc01396/mc05179/mc06198/mc06984/mc14744/mc15418/mc28783/mc31112/mc34018/mc34114	11
MF	GO:0008092	cytoskeletal protein binding	65/1518	369/14722	1.08e-05	0.000307964	0.000234772	mc00430/mc01396/mc02009/mc02255/mc02433/mc02438/mc02448/mc02476/mc03877/mc05435/mc06167/mc07045/mc08523/mc08565/mc08630/mc11386/mc11999/mc12306/mc12307/mc12700/mc12727/mc12991/mc13601/mc14677/mc16959/mc17565/mc17765/mc17809/mc19597/mc20388/mc22043/mc22074/mc22426/mc23108/mc24338/mc24706/mc24963/mc26565/mc26566/mc27146/mc27346/mc34018/mc34114/mc35851/mc35853/mc35854/mc35856/mc35857/mc35859/mc35861…	65
MF	GO:0004420	hydroxymethylglutaryl-CoA reductase (NADPH) activity	7/1518	10/14722	1.11e-05	0.000307964	0.000234772	mc00845/mc13600/mc21353/mc23107/mc30836/mc32310/mc34370	7
MF	GO:0005543	phospholipid binding	36/1518	168/14722	1.55e-05	0.000404717	0.000308531	mc00055/mc02609/mc03697/mc03749/mc04418/mc05179/mc06198/mc06984/mc07542/mc08772/mc09697/mc09847/mc09922/mc11239/mc11513/mc11621/mc14744/mc15418/mc15720/mc17355/mc17450/mc19510/mc19889/mc23960/mc26269/mc26574/mc28342/mc28783/mc29832/mc30038/mc31112/mc31642/mc32641/mc32889/mc36700/mc38418	36
MF	GO:0009927	histidine phosphotransfer kinase activity	9/1518	18/14722	2.63e-05	0.000645713	0.000492252	mc10514/mc16515/mc21662/mc26441/mc27412/mc27802/mc33079/mc39200/mc39718	9
MF	GO:0003690	double-stranded DNA binding	60/1518	347/14722	4.08e-05	0.000945542	0.000720822	mc01531/mc01863/mc02570/mc03569/mc03659/mc03738/mc04030/mc04699/mc05238/mc05784/mc06050/mc06140/mc06656/mc07087/mc07802/mc08305/mc09662/mc09761/mc09828/mc10650/mc11166/mc11221/mc11531/mc11533/mc13041/mc13752/mc13978/mc14096/mc14638/mc14639/mc17378/mc17432/mc17743/mc18173/mc18363/mc18955/mc19013/mc22224/mc22226/mc22470/mc23504/mc24238/mc24395/mc24396/mc24670/mc25972/mc29628/mc30251/mc30835/mc30885…	60
MF	GO:0000285	1-phosphatidylinositol-3-phosphate 5-kinase activity	7/1518	12/14722	6.06e-05	0.00126414	0.000963699	mc05179/mc06198/mc06984/mc14744/mc15418/mc28783/mc31112	7
MF	GO:0003906	DNA-(apurinic or apyrimidinic site) endonuclease activity	7/1518	12/14722	6.06e-05	0.00126414	0.000963699	mc03756/mc09856/mc17738/mc19043/mc20364/mc21633/mc32550	7
MF	GO:0003682	chromatin binding	41/1518	214/14722	6.66e-05	0.00132208	0.00100787	mc00759/mc02177/mc02178/mc02570/mc03619/mc03738/mc04030/mc04699/mc05238/mc06050/mc07802/mc08305/mc09081/mc09828/mc09961/mc11221/mc11531/mc11533/mc12831/mc14096/mc17432/mc18173/mc19013/mc21075/mc22185/mc23411/mc24238/mc24395/mc24396/mc24877/mc24878/mc29628/mc30251/mc30885/mc32104/mc32356/mc34026/mc34449/mc36297/mc38129/mc40209	41
MF	GO:0008017	microtubule binding	32/1518	153/14722	7.4e-05	0.001369	0.00104364	mc02255/mc03877/mc05435/mc06167/mc07045/mc11386/mc12727/mc14677/mc17565/mc17765/mc17809/mc22074/mc24963/mc35851/mc35853/mc35854/mc35856/mc35857/mc35859/mc35861/mc35862/mc35864/mc35869/mc35870/mc35873/mc35874/mc35876/mc35877/mc35880/mc35881/mc35884/mc35886	32
MF	GO:0010011	auxin binding	8/1518	16/14722	7.55e-05	0.001369	0.00104364	mc00100/mc13296/mc22775/mc23932/mc24464/mc29783/mc29987/mc38445	8
MF	GO:0015631	tubulin binding	35/1518	176/14722	0.000102668	0.00178385	0.0013599	mc02255/mc03877/mc05435/mc06167/mc07045/mc11386/mc12727/mc14677/mc17565/mc17765/mc17809/mc22074/mc24963/mc26565/mc26566/mc35851/mc35853/mc35854/mc35856/mc35857/mc35859/mc35861/mc35862/mc35864/mc35869/mc35870/mc35873/mc35874/mc35876/mc35877/mc35880/mc35881/mc35884/mc35886/mc37860	35
MF	GO:0140297	DNA-binding transcription factor binding	27/1518	124/14722	0.000130004	0.00208748	0.00159136	mc02570/mc03738/mc04030/mc04699/mc05238/mc06050/mc07802/mc08305/mc09828/mc11221/mc11531/mc11533/mc14096/mc17432/mc18173/mc19013/mc24238/mc24395/mc24396/mc29628/mc30251/mc30885/mc32356/mc34026/mc36297/mc38129/mc40209	27
MF	GO:1901981	phosphatidylinositol phosphate binding	18/1518	68/14722	0.000130155	0.00208748	0.00159136	mc02609/mc03697/mc03749/mc05179/mc06198/mc06984/mc08772/mc09847/mc09922/mc11239/mc11621/mc14744/mc15418/mc17355/mc19510/mc28783/mc31112/mc36700	18
MF	GO:0051015	actin filament binding	23/1518	99/14722	0.00014478	0.00223604	0.00170462	mc00430/mc01396/mc02009/mc02433/mc02438/mc02448/mc02476/mc08523/mc08565/mc11999/mc12700/mc12991/mc16959/mc22043/mc22426/mc24338/mc24706/mc27146/mc27346/mc34018/mc34114/mc39651/mc40435	23
MF	GO:0052793	pectin acetylesterase activity	6/1518	10/14722	0.000173198	0.00257942	0.00196639	mc09065/mc17817/mc19131/mc29267/mc30506/mc36074	6
MF	GO:0043424	protein histidine kinase binding	13/1518	42/14722	0.000205326	0.00295245	0.00225076	mc10514/mc16515/mc18034/mc20019/mc21662/mc26441/mc27412/mc27802/mc33079/mc36151/mc36154/mc39200/mc39718	13
MF	GO:1901683	arsenate ion transmembrane transporter activity	8/1518	18/14722	0.000212488	0.00295358	0.00225163	mc02623/mc07331/mc08758/mc25078/mc26488/mc31414/mc31897/mc39375	8
MF	GO:0003714	transcription corepressor activity	15/1518	55/14722	0.00032625	0.00438859	0.00334559	mc05864/mc06192/mc06203/mc06968/mc11531/mc11533/mc14263/mc14264/mc15098/mc15414/mc15423/mc17432/mc28773/mc34026/mc40930	15
MF	GO:0046982	protein heterodimerization activity	20/1518	86/14722	0.000377956	0.00492524	0.0037547	mc02103/mc09697/mc10806/mc11513/mc12912/mc13879/mc15679/mc16116/mc17450/mc17635/mc19582/mc20324/mc22267/mc23709/mc24810/mc25693/mc32102/mc35437/mc38723/mc40790	20
MF	GO:0046961	proton-transporting ATPase activity, rotational mechanism	9/1518	25/14722	0.00056664	0.00716027	0.00545854	mc00790/mc01814/mc02118/mc12893/mc13500/mc23000/mc24823/mc34424/mc35031	9
MF	GO:0019104	DNA N-glycosylase activity	7/1518	16/14722	0.000603406	0.00740059	0.00564175	mc03756/mc09856/mc17738/mc19043/mc20364/mc21633/mc32550	7
MF	GO:0035091	phosphatidylinositol binding	23/1518	111/14722	0.000830286	0.00989227	0.00754125	mc02609/mc03697/mc03749/mc05179/mc06198/mc06984/mc08772/mc09697/mc09847/mc09922/mc11239/mc11513/mc11621/mc14744/mc15418/mc15720/mc17355/mc17450/mc19510/mc19889/mc28783/mc31112/mc36700	23
MF	GO:0005198	structural molecule activity	67/1518	447/14722	0.00107185	0.0118129	0.00900544	mc00193/mc00236/mc01498/mc01823/mc02177/mc02178/mc02513/mc02588/mc04277/mc04451/mc05246/mc05639/mc06180/mc07575/mc07948/mc08597/mc08678/mc09522/mc09769/mc10112/mc10228/mc10810/mc11142/mc12831/mc13451/mc13585/mc13956/mc17655/mc18142/mc18147/mc18500/mc19299/mc20404/mc21222/mc21433/mc21597/mc22185/mc22549/mc22940/mc23090/mc24281/mc24527/mc24560/mc24877/mc24878/mc26636/mc26739/mc26864/mc27677/mc28816…	67
MF	GO:0046556	alpha-L-arabinofuranosidase activity	6/1518	13/14722	0.00107648	0.0118129	0.00900544	mc25986/mc28876/mc31018/mc33263/mc34123/mc34132	6
MF	GO:0051861	glycolipid binding	6/1518	13/14722	0.00107648	0.0118129	0.00900544	mc23960/mc26574/mc29832/mc30038/mc32641/mc38418	6
MF	GO:0004175	endopeptidase activity	41/1518	244/14722	0.00114181	0.0122086	0.00930704	mc03054/mc03112/mc09135/mc09198/mc09583/mc10280/mc10284/mc10288/mc10289/mc10298/mc10299/mc19202/mc19203/mc19204/mc19613/mc20383/mc27597/mc28887/mc30607/mc37392/mc37393/mc37394/mc37395/mc37396/mc37399/mc37400/mc37402/mc37403/mc37408/mc37410/mc37435/mc37437/mc37438/mc37439/mc37442/mc37454/mc37485/mc37669/mc37670/mc37680/mc39969	41
MF	GO:0003735	structural constituent of ribosome	52/1518	336/14722	0.00185792	0.0184307	0.0140504	mc00193/mc00236/mc01498/mc02513/mc02588/mc04277/mc04451/mc05246/mc05639/mc06180/mc07575/mc07948/mc08597/mc08678/mc09769/mc10112/mc10228/mc10810/mc11142/mc13585/mc13956/mc17655/mc18142/mc18147/mc18500/mc19299/mc20404/mc21222/mc21433/mc21597/mc22549/mc23090/mc24281/mc24527/mc24560/mc26636/mc26864/mc28816/mc29669/mc30236/mc31075/mc31723/mc32324/mc32576/mc32809/mc34785/mc35642/mc36269/mc38080/mc38145…	52
MF	GO:0003933	GTP cyclohydrolase activity	5/1518	10/14722	0.00187048	0.0184307	0.0140504	mc25196/mc26321/mc26322/mc31730/mc32957	5
MF	GO:0043028	cysteine-type endopeptidase regulator activity involved in apoptotic process	5/1518	10/14722	0.00187048	0.0184307	0.0140504	mc04277/mc13585/mc23090/mc26864/mc32324	5
MF	GO:0044769	ATPase activity, coupled to transmembrane movement of ions, rotational mechanism	9/1518	29/14722	0.00190053	0.0184307	0.0140504	mc00790/mc01814/mc02118/mc12893/mc13500/mc23000/mc24823/mc34424/mc35031	9
MF	GO:0008553	proton-exporting ATPase activity, phosphorylative mechanism	7/1518	19/14722	0.00201349	0.0190824	0.0145473	mc05318/mc12548/mc26191/mc29572/mc30828/mc32798/mc40897	7
MF	GO:0046983	protein dimerization activity	68/1518	468/14722	0.00221621	0.0205368	0.015656	mc00877/mc01913/mc01914/mc02103/mc02119/mc02476/mc02675/mc04668/mc08565/mc08700/mc09697/mc09751/mc10806/mc11513/mc12448/mc12700/mc12891/mc12912/mc13879/mc13899/mc15679/mc16116/mc17426/mc17450/mc17635/mc18909/mc19582/mc20324/mc21766/mc22043/mc22246/mc22267/mc23709/mc23960/mc24810/mc24825/mc24833/mc25090/mc25196/mc25214/mc25693/mc25972/mc26299/mc26321/mc26322/mc26574/mc27146/mc28092/mc29647/mc29832…	68
MF	GO:1990939	ATP-dependent microtubule motor activity	10/1518	36/14722	0.00272417	0.0246952	0.0188261	mc02059/mc10008/mc11628/mc11629/mc11630/mc12979/mc17344/mc21113/mc22350/mc24762	10
MF	GO:0030695	GTPase regulator activity	27/1518	151/14722	0.00310356	0.0272737	0.0207918	mc00055/mc01207/mc04178/mc04418/mc05244/mc05641/mc06261/mc06868/mc07542/mc12078/mc13601/mc13728/mc14810/mc16870/mc23108/mc23262/mc25384/mc26269/mc26971/mc27451/mc28342/mc29665/mc30240/mc31642/mc32194/mc32889/mc39764	27
MF	GO:0015203	polyamine transmembrane transporter activity	5/1518	11/14722	0.00313942	0.0272737	0.0207918	mc16608/mc16646/mc26902/mc32286/mc39129	5
MF	GO:0016297	acyl-[acyl-carrier-protein] hydrolase activity	6/1518	16/14722	0.00382822	0.0325789	0.0248362	mc05741/mc06620/mc06851/mc14399/mc14824/mc15030	6
MF	GO:0003924	GTPase activity	24/1518	133/14722	0.00453471	0.0378195	0.0288312	mc11218/mc17765/mc17809/mc35851/mc35853/mc35854/mc35856/mc35857/mc35859/mc35861/mc35862/mc35864/mc35869/mc35870/mc35873/mc35874/mc35876/mc35877/mc35880/mc35881/mc35884/mc35886/mc38144/mc40586	24
MF	GO:0004427	inorganic diphosphatase activity	5/1518	12/14722	0.00492839	0.0395219	0.030129	mc04675/mc07278/mc29641/mc30901/mc40674	5
MF	GO:1905538	polysome binding	5/1518	12/14722	0.00492839	0.0395219	0.030129	mc25046/mc28074/mc31908/mc39382/mc39399	5
MF	GO:0016799	hydrolase activity, hydrolyzing N-glycosyl compounds	7/1518	22/14722	0.00517134	0.0406877	0.0310177	mc03756/mc09856/mc17738/mc19043/mc20364/mc21633/mc32550	7
MF	GO:0009044	xylan 1,4-beta-xylosidase activity	6/1518	17/14722	0.00540636	0.0417491	0.0318269	mc25986/mc28876/mc31018/mc33263/mc34123/mc34132	6
MF	GO:0044390	ubiquitin-like protein conjugating enzyme binding	11/1518	46/14722	0.00601938	0.0456379	0.0347914	mc00739/mc01785/mc02084/mc03095/mc07746/mc15829/mc20024/mc22305/mc28938/mc30576/mc34960	11
