# Supplementary material for: Chromosomal-level genome assembly of Melastoma candidum provides insights into trichome evolution
Source: Front Plant Sci. 2023 Jan 27;14:1126319. doi: 10.3389/fpls.2023.1126319 (PMC9911893; doi:10.3389/fpls.2023.1126319)
Supplement: Supplementary file 4 [file Table_3.xlsx]

## Sheet: Supplementary Excel file 3. GO 
Supplementary Excel file 3 GO enrichment analysis of retained genes after WGD s
ONTOLOGY	ID	Description	GeneRatio	BgRatio	pvalue	p.adjust	qvalue	geneID	Count
BP	GO:1901348	positive regulation of secondary cell wall biogenesis	18/4415	20/16975	3.12633e-09	3.21179e-06	2.8499e-06	mc01096/mc01618/mc04705/mc07808/mc10698/mc11783/mc12472/mc17182/mc19696/mc21786/mc23570/mc26284/mc29621/mc30878/mc32903/mc33716/mc34632/mc38931	18
BP	GO:1903340	positive regulation of cell wall organization or biogenesis	18/4415	20/16975	3.12633e-09	3.21179e-06	2.8499e-06	mc01096/mc01618/mc04705/mc07808/mc10698/mc11783/mc12472/mc17182/mc19696/mc21786/mc23570/mc26284/mc29621/mc30878/mc32903/mc33716/mc34632/mc38931	18
BP	GO:1905177	tracheary element differentiation	18/4415	20/16975	3.12633e-09	3.21179e-06	2.8499e-06	mc01096/mc01618/mc04705/mc05693/mc06050/mc06995/mc07808/mc10698/mc14096/mc14338/mc14730/mc19696/mc23570/mc29621/mc30878/mc33716/mc34632/mc38931	18
BP	GO:0043487	regulation of RNA stability	36/4415	62/16975	9.10767e-08	7.01746e-05	6.22677e-05	mc00476/mc00612/mc01041/mc03461/mc03603/mc06181/mc06220/mc06625/mc09555/mc09706/mc11716/mc11765/mc13019/mc15024/mc15394/mc15430/mc16012/mc17203/mc17253/mc18558/mc20210/mc22455/mc26640/mc28283/mc28987/mc29395/mc29613/mc30284/mc30644/mc30867/mc31706/mc32572/mc33672/mc34203/mc35192/mc35596	36
BP	GO:0043489	RNA stabilization	22/4415	31/16975	2.04225e-07	0.000104904	9.30837e-05	mc00476/mc00612/mc01041/mc03461/mc06625/mc09555/mc11716/mc13019/mc15024/mc16012/mc17253/mc18558/mc20210/mc22455/mc26640/mc28987/mc30284/mc32572/mc33672/mc34203/mc35192/mc35596	22
BP	GO:1902369	negative regulation of RNA catabolic process	22/4415	31/16975	2.04225e-07	0.000104904	9.30837e-05	mc00476/mc00612/mc01041/mc03461/mc06625/mc09555/mc11716/mc13019/mc15024/mc16012/mc17253/mc18558/mc20210/mc22455/mc26640/mc28987/mc30284/mc32572/mc33672/mc34203/mc35192/mc35596	22
BP	GO:0048759	xylem vessel member cell differentiation	14/4415	16/16975	4.40115e-07	0.000193776	0.000171943	mc01096/mc01618/mc04705/mc06995/mc07808/mc10698/mc14730/mc19696/mc23570/mc29621/mc30878/mc33716/mc34632/mc38931	14
BP	GO:2000652	regulation of secondary cell wall biogenesis	21/4415	30/16975	5.62775e-07	0.000216809	0.00019238	mc01096/mc01618/mc04705/mc07808/mc10698/mc11783/mc12472/mc13372/mc17182/mc19696/mc21786/mc22856/mc23570/mc26284/mc29621/mc30878/mc32903/mc33716/mc33815/mc34632/mc38931	21
BP	GO:1903338	regulation of cell wall organization or biogenesis	29/4415	49/16975	9.3186e-07	0.00031911	0.000283155	mc01096/mc01618/mc03161/mc04705/mc05249/mc05638/mc07808/mc09243/mc10698/mc11783/mc12472/mc13372/mc17182/mc19696/mc21786/mc22856/mc23570/mc23596/mc26284/mc28639/mc29621/mc30878/mc31254/mc32903/mc33716/mc33815/mc34632/mc38897/mc38931	29
BP	GO:0007010	cytoskeleton organization	163/4415	452/16975	1.1271e-06	0.000347373	0.000308233	mc00522/mc00667/mc00732/mc00750/mc00794/mc00836/mc01070/mc01280/mc01816/mc01998/mc02254/mc02354/mc02433/mc02476/mc03100/mc03104/mc03877/mc04353/mc04550/mc04596/mc04682/mc05203/mc05249/mc05268/mc05435/mc05625/mc05638/mc05967/mc06516/mc06754/mc06983/mc07031/mc07163/mc07470/mc07675/mc07714/mc07786/mc08455/mc08523/mc08565/mc09178/mc09185/mc09522/mc10008/mc10305/mc10373/mc10735/mc10888/mc11155/mc11386…	163
BP	GO:0009787	regulation of abscisic acid-activated signaling pathway	90/4415	223/16975	1.78136e-06	0.00042232	0.000374735	mc00473/mc00605/mc01348/mc01483/mc02460/mc02633/mc02640/mc02743/mc02908/mc03250/mc03522/mc04289/mc04929/mc05272/mc05320/mc05585/mc05611/mc06931/mc07417/mc07987/mc08550/mc08738/mc08747/mc08851/mc09038/mc09377/mc09621/mc11190/mc11417/mc12204/mc12837/mc12849/mc12972/mc13063/mc13414/mc13581/mc14772/mc17539/mc17838/mc18182/mc18977/mc19564/mc21493/mc22193/mc22206/mc22339/mc22491/mc22899/mc23085/mc23961…	90
BP	GO:1901419	regulation of response to alcohol	90/4415	223/16975	1.78136e-06	0.00042232	0.000374735	mc00473/mc00605/mc01348/mc01483/mc02460/mc02633/mc02640/mc02743/mc02908/mc03250/mc03522/mc04289/mc04929/mc05272/mc05320/mc05585/mc05611/mc06931/mc07417/mc07987/mc08550/mc08738/mc08747/mc08851/mc09038/mc09377/mc09621/mc11190/mc11417/mc12204/mc12837/mc12849/mc12972/mc13063/mc13414/mc13581/mc14772/mc17539/mc17838/mc18182/mc18977/mc19564/mc21493/mc22193/mc22206/mc22339/mc22491/mc22899/mc23085/mc23961…	90
BP	GO:1905957	regulation of cellular response to alcohol	90/4415	223/16975	1.78136e-06	0.00042232	0.000374735	mc00473/mc00605/mc01348/mc01483/mc02460/mc02633/mc02640/mc02743/mc02908/mc03250/mc03522/mc04289/mc04929/mc05272/mc05320/mc05585/mc05611/mc06931/mc07417/mc07987/mc08550/mc08738/mc08747/mc08851/mc09038/mc09377/mc09621/mc11190/mc11417/mc12204/mc12837/mc12849/mc12972/mc13063/mc13414/mc13581/mc14772/mc17539/mc17838/mc18182/mc18977/mc19564/mc21493/mc22193/mc22206/mc22339/mc22491/mc22899/mc23085/mc23961…	90
BP	GO:0043488	regulation of mRNA stability	28/4415	49/16975	3.77222e-06	0.00080473	0.000714058	mc00476/mc00612/mc01041/mc03603/mc06181/mc06220/mc06625/mc09706/mc11716/mc13019/mc15024/mc15394/mc15430/mc17253/mc18558/mc22455/mc28283/mc28987/mc29395/mc29613/mc30284/mc30644/mc30867/mc31706/mc33672/mc34203/mc35192/mc35596	28
BP	GO:0032535	regulation of cellular component size	67/4415	157/16975	3.9166e-06	0.00080473	0.000714058	mc00254/mc00522/mc00667/mc01563/mc02221/mc02433/mc02476/mc02667/mc03813/mc06516/mc06636/mc06754/mc08523/mc08565/mc08713/mc09908/mc10305/mc10888/mc10892/mc12078/mc12486/mc12700/mc13601/mc14908/mc15014/mc15134/mc15751/mc15953/mc16749/mc16870/mc17698/mc18322/mc18719/mc18724/mc19932/mc20163/mc21798/mc22043/mc23108/mc23946/mc24161/mc24338/mc24578/mc24930/mc25119/mc26028/mc26648/mc26819/mc27451/mc27477…	67
BP	GO:0048255	mRNA stabilization	16/4415	22/16975	6.01206e-06	0.00108995	0.000967141	mc00476/mc00612/mc01041/mc06625/mc11716/mc13019/mc15024/mc17253/mc18558/mc22455/mc28987/mc30284/mc33672/mc34203/mc35192/mc35596	16
BP	GO:1902373	negative regulation of mRNA catabolic process	16/4415	22/16975	6.01206e-06	0.00108995	0.000967141	mc00476/mc00612/mc01041/mc06625/mc11716/mc13019/mc15024/mc17253/mc18558/mc22455/mc28987/mc30284/mc33672/mc34203/mc35192/mc35596	16
BP	GO:0031330	negative regulation of cellular catabolic process	28/4415	50/16975	6.45026e-06	0.00110443	0.000979987	mc00476/mc00612/mc00817/mc01041/mc03461/mc06625/mc06636/mc06796/mc09555/mc11716/mc13019/mc14880/mc15014/mc15024/mc16012/mc17253/mc18558/mc20210/mc22455/mc26640/mc28987/mc30284/mc32572/mc33672/mc34203/mc35058/mc35192/mc35596	28
BP	GO:0030036	actin cytoskeleton organization	77/4415	190/16975	8.04794e-06	0.00130546	0.00115837	mc00522/mc00667/mc00732/mc00750/mc00836/mc01998/mc02254/mc02354/mc02433/mc02476/mc04353/mc05203/mc05967/mc06516/mc06754/mc06983/mc07163/mc07470/mc08455/mc08523/mc08565/mc10305/mc10888/mc12486/mc12700/mc12729/mc12738/mc13019/mc13601/mc14179/mc14746/mc14908/mc15134/mc15693/mc15953/mc16749/mc17698/mc17880/mc18719/mc19865/mc20163/mc21798/mc22043/mc22076/mc22086/mc22455/mc23108/mc23694/mc24161/mc24338…	77
BP	GO:0090066	regulation of anatomical structure size	69/4415	167/16975	1.08075e-05	0.00145619	0.00129212	mc00254/mc00522/mc00667/mc01563/mc02221/mc02433/mc02476/mc02667/mc03813/mc06516/mc06636/mc06754/mc08523/mc08565/mc08713/mc09908/mc10305/mc10888/mc10892/mc12078/mc12364/mc12486/mc12700/mc13601/mc14908/mc15014/mc15134/mc15751/mc15953/mc16749/mc16870/mc17698/mc18322/mc18719/mc18724/mc19932/mc20163/mc21693/mc21798/mc22043/mc23108/mc23946/mc24161/mc24338/mc24578/mc24930/mc25119/mc26028/mc26648/mc26819…	69
BP	GO:0009789	positive regulation of abscisic acid-activated signaling pathway	44/4415	94/16975	1.08671e-05	0.00145619	0.00129212	mc00473/mc00605/mc01483/mc02633/mc02908/mc04929/mc05272/mc05611/mc07987/mc08747/mc09038/mc11417/mc12849/mc12972/mc13414/mc13581/mc17539/mc17838/mc18182/mc22206/mc22339/mc22899/mc23085/mc25636/mc25825/mc26506/mc26641/mc26860/mc27306/mc28342/mc28951/mc30257/mc31642/mc32328/mc32571/mc33142/mc33444/mc33662/mc34201/mc34800/mc35187/mc35913/mc36318/mc39612	44
BP	GO:1901421	positive regulation of response to alcohol	44/4415	94/16975	1.08671e-05	0.00145619	0.00129212	mc00473/mc00605/mc01483/mc02633/mc02908/mc04929/mc05272/mc05611/mc07987/mc08747/mc09038/mc11417/mc12849/mc12972/mc13414/mc13581/mc17539/mc17838/mc18182/mc22206/mc22339/mc22899/mc23085/mc25636/mc25825/mc26506/mc26641/mc26860/mc27306/mc28342/mc28951/mc30257/mc31642/mc32328/mc32571/mc33142/mc33444/mc33662/mc34201/mc34800/mc35187/mc35913/mc36318/mc39612	44
BP	GO:1905959	positive regulation of cellular response to alcohol	44/4415	94/16975	1.08671e-05	0.00145619	0.00129212	mc00473/mc00605/mc01483/mc02633/mc02908/mc04929/mc05272/mc05611/mc07987/mc08747/mc09038/mc11417/mc12849/mc12972/mc13414/mc13581/mc17539/mc17838/mc18182/mc22206/mc22339/mc22899/mc23085/mc25636/mc25825/mc26506/mc26641/mc26860/mc27306/mc28342/mc28951/mc30257/mc31642/mc32328/mc32571/mc33142/mc33444/mc33662/mc34201/mc34800/mc35187/mc35913/mc36318/mc39612	44
BP	GO:0009895	negative regulation of catabolic process	28/4415	52/16975	1.75521e-05	0.0020806	0.00184617	mc00476/mc00612/mc00817/mc01041/mc03461/mc06625/mc06636/mc06796/mc09555/mc11716/mc13019/mc14880/mc15014/mc15024/mc16012/mc17253/mc18558/mc20210/mc22455/mc26640/mc28987/mc30284/mc32572/mc33672/mc34203/mc35058/mc35192/mc35596	28
BP	GO:0031344	regulation of cell projection organization	28/4415	52/16975	1.75521e-05	0.0020806	0.00184617	mc00484/mc01751/mc02254/mc06982/mc06983/mc12078/mc12308/mc12729/mc13198/mc14746/mc14748/mc16870/mc17880/mc21620/mc22076/mc22536/mc24962/mc25865/mc27294/mc27451/mc29060/mc30333/mc33404/mc34207/mc34496/mc35962/mc39597/mc39764	28
BP	GO:0120035	regulation of plasma membrane bounded cell projection organization	28/4415	52/16975	1.75521e-05	0.0020806	0.00184617	mc00484/mc01751/mc02254/mc06982/mc06983/mc12078/mc12308/mc12729/mc13198/mc14746/mc14748/mc16870/mc17880/mc21620/mc22076/mc22536/mc24962/mc25865/mc27294/mc27451/mc29060/mc30333/mc33404/mc34207/mc34496/mc35962/mc39597/mc39764	28
BP	GO:0009967	positive regulation of signal transduction	100/4415	267/16975	2.26244e-05	0.00258253	0.00229155	mc00428/mc00473/mc00605/mc01483/mc02633/mc02908/mc02978/mc03258/mc03646/mc03749/mc04057/mc04610/mc04929/mc05272/mc05611/mc06254/mc06440/mc06636/mc07729/mc07987/mc08284/mc08747/mc09038/mc09054/mc09365/mc09744/mc09847/mc09922/mc10118/mc11417/mc11529/mc12340/mc12849/mc12958/mc12972/mc13107/mc13414/mc13581/mc15014/mc15205/mc15364/mc16349/mc17433/mc17539/mc17838/mc18182/mc19506/mc20540/mc21229/mc21665…	100
BP	GO:0046856	phosphatidylinositol dephosphorylation	19/4415	31/16975	3.62036e-05	0.00395282	0.00350744	mc01471/mc03790/mc03847/mc09878/mc11243/mc16043/mc18370/mc19036/mc20237/mc25157/mc27350/mc29060/mc29586/mc30333/mc30844/mc34811/mc36520/mc38310/mc39656	19
BP	GO:0006650	glycerophospholipid metabolic process	61/4415	148/16975	3.7194e-05	0.00395282	0.00350744	mc00430/mc00534/mc01396/mc01471/mc03278/mc03790/mc03847/mc03904/mc04364/mc04430/mc04933/mc05470/mc06198/mc06982/mc06984/mc07481/mc07553/mc07992/mc09337/mc09878/mc11243/mc12273/mc12849/mc13414/mc14744/mc14748/mc15418/mc16043/mc16433/mc17853/mc18370/mc19036/mc20237/mc20653/mc21579/mc22206/mc22899/mc23992/mc25157/mc25192/mc27350/mc28783/mc28787/mc29060/mc29557/mc29586/mc30333/mc30818/mc30844/mc31108…	61
BP	GO:0048259	regulation of receptor-mediated endocytosis	9/4415	10/16975	4.14811e-05	0.00415519	0.00368701	mc01037/mc03847/mc25130/mc25157/mc28146/mc31812/mc33667/mc38310/mc40070	9
BP	GO:0044087	regulation of cellular component biogenesis	96/4415	258/16975	4.38188e-05	0.00415519	0.00368701	mc00522/mc00667/mc01096/mc01618/mc01811/mc02254/mc02433/mc02476/mc04705/mc04815/mc05745/mc06516/mc06754/mc06983/mc07808/mc07881/mc08523/mc08565/mc10305/mc10539/mc10698/mc10888/mc11697/mc11783/mc12472/mc12700/mc12729/mc12738/mc13019/mc13372/mc13483/mc13543/mc13601/mc13673/mc13930/mc14405/mc14746/mc14908/mc15134/mc15953/mc16749/mc17182/mc17278/mc17698/mc17880/mc18719/mc19180/mc19696/mc20163/mc21017…	96
BP	GO:0023056	positive regulation of signaling	100/4415	271/16975	4.51331e-05	0.00415519	0.00368701	mc00428/mc00473/mc00605/mc01483/mc02633/mc02908/mc02978/mc03258/mc03646/mc03749/mc04057/mc04610/mc04929/mc05272/mc05611/mc06254/mc06440/mc06636/mc07729/mc07987/mc08284/mc08747/mc09038/mc09054/mc09365/mc09744/mc09847/mc09922/mc10118/mc11417/mc11529/mc12340/mc12849/mc12958/mc12972/mc13107/mc13414/mc13581/mc15014/mc15205/mc15364/mc16349/mc17433/mc17539/mc17838/mc18182/mc19506/mc20540/mc21229/mc21665…	100
BP	GO:0030029	actin filament-based process	83/4415	217/16975	4.6137e-05	0.00415519	0.00368701	mc00522/mc00667/mc00732/mc00750/mc00836/mc01998/mc02254/mc02354/mc02433/mc02476/mc04353/mc05203/mc05967/mc06516/mc06754/mc06939/mc06983/mc07163/mc07470/mc08455/mc08523/mc08565/mc10305/mc10888/mc12486/mc12700/mc12729/mc12738/mc13019/mc13601/mc14179/mc14746/mc14769/mc14908/mc15134/mc15693/mc15953/mc16749/mc17698/mc17880/mc18719/mc19865/mc20163/mc21798/mc22043/mc22076/mc22086/mc22455/mc23108/mc23694…	83
BP	GO:0048528	post-embryonic root development	94/4415	252/16975	4.69304e-05	0.00415519	0.00368701	mc00124/mc00163/mc00430/mc00972/mc00994/mc01110/mc01396/mc01672/mc02053/mc03117/mc03359/mc03385/mc04304/mc04728/mc05025/mc06201/mc06268/mc06457/mc06487/mc06684/mc07432/mc07833/mc08088/mc09206/mc09448/mc09482/mc10681/mc10898/mc11933/mc12634/mc12994/mc13022/mc13288/mc13296/mc14977/mc15163/mc15190/mc15353/mc15416/mc15751/mc17027/mc18385/mc18726/mc19716/mc19932/mc21969/mc22390/mc22457/mc22759/mc22775…	94
BP	GO:0046488	phosphatidylinositol metabolic process	41/4415	90/16975	4.71875e-05	0.00415519	0.00368701	mc00430/mc01396/mc01471/mc03790/mc03847/mc04364/mc04430/mc06198/mc06982/mc06984/mc07481/mc07553/mc09878/mc11243/mc14744/mc14748/mc15418/mc16043/mc16433/mc18370/mc19036/mc20237/mc20653/mc25157/mc25192/mc27350/mc28783/mc29060/mc29557/mc29586/mc30333/mc30818/mc30844/mc31112/mc34018/mc34114/mc34811/mc36520/mc38310/mc39656/mc40110	41
BP	GO:0007155	cell adhesion	29/4415	57/16975	5.08176e-05	0.00435055	0.00386035	mc01998/mc02254/mc04423/mc06110/mc06506/mc07547/mc10441/mc11933/mc12473/mc12729/mc14015/mc15143/mc16318/mc16461/mc16623/mc17027/mc17880/mc20512/mc20695/mc21787/mc22076/mc24352/mc24697/mc24962/mc25206/mc32902/mc35962/mc37974/mc40124	29
BP	GO:0006644	phospholipid metabolic process	92/4415	247/16975	5.98326e-05	0.00498389	0.00442233	mc00430/mc00534/mc00928/mc01396/mc01471/mc02573/mc03278/mc03790/mc03847/mc03904/mc04170/mc04290/mc04364/mc04430/mc04472/mc04933/mc05470/mc05758/mc06198/mc06982/mc06984/mc07418/mc07481/mc07553/mc07600/mc07992/mc08152/mc08666/mc09337/mc09878/mc11243/mc11543/mc12273/mc12849/mc13414/mc14416/mc14744/mc14748/mc15418/mc15781/mc16043/mc16433/mc16468/mc17418/mc17853/mc18370/mc19036/mc19480/mc19975/mc20237…	92
BP	GO:0035295	tube development	31/4415	63/16975	6.48327e-05	0.00525827	0.0046658	mc00817/mc01751/mc02254/mc03749/mc04057/mc06371/mc06796/mc08284/mc09847/mc09922/mc10487/mc12729/mc12949/mc13019/mc14880/mc15261/mc16565/mc17880/mc22076/mc22303/mc22455/mc24962/mc25898/mc27255/mc29730/mc30143/mc33367/mc34496/mc35058/mc35962/mc39558	31
BP	GO:0022610	biological adhesion	29/4415	58/16975	7.65246e-05	0.00593109	0.00526281	mc01998/mc02254/mc04423/mc06110/mc06506/mc07547/mc10441/mc11933/mc12473/mc12729/mc14015/mc15143/mc16318/mc16461/mc16623/mc17027/mc17880/mc20512/mc20695/mc21787/mc22076/mc24352/mc24697/mc24962/mc25206/mc32902/mc35962/mc37974/mc40124	29
BP	GO:0009834	plant-type secondary cell wall biogenesis	51/4415	121/16975	7.862e-05	0.00593109	0.00526281	mc00930/mc01046/mc01096/mc01427/mc01618/mc04018/mc04585/mc04590/mc04705/mc06043/mc07701/mc07705/mc07808/mc08315/mc10202/mc10340/mc10698/mc11654/mc11783/mc12472/mc13372/mc14102/mc16204/mc16731/mc17182/mc17322/mc17969/mc19500/mc19696/mc20413/mc21313/mc21786/mc22856/mc23570/mc23596/mc24077/mc26284/mc29621/mc30878/mc32903/mc33678/mc33716/mc33815/mc34043/mc34632/mc34928/mc36042/mc36729/mc38299/mc38897…	51
BP	GO:0044089	positive regulation of cellular component biogenesis	54/4415	130/16975	7.89016e-05	0.00593109	0.00526281	mc00522/mc00667/mc01096/mc01618/mc01811/mc02254/mc02433/mc04705/mc05745/mc07808/mc08523/mc10305/mc10539/mc10698/mc11783/mc12472/mc12729/mc12738/mc13019/mc13930/mc14405/mc16749/mc17182/mc17698/mc17880/mc19180/mc19696/mc21017/mc21786/mc22076/mc22086/mc22455/mc23570/mc24338/mc24962/mc26284/mc28079/mc28549/mc28821/mc29621/mc30878/mc31072/mc31388/mc31906/mc32903/mc33716/mc34246/mc34632/mc35273/mc35734…	54
BP	GO:0061013	regulation of mRNA catabolic process	30/4415	61/16975	8.57033e-05	0.00628899	0.00558038	mc00476/mc00612/mc01041/mc03603/mc04856/mc06181/mc06220/mc06625/mc07919/mc09706/mc11716/mc13019/mc15024/mc15394/mc15430/mc17253/mc18558/mc22455/mc28283/mc28987/mc29395/mc29613/mc30284/mc30644/mc30867/mc31706/mc33672/mc34203/mc35192/mc35596	30
BP	GO:0007399	nervous system development	57/4415	140/16975	9.83927e-05	0.00693488	0.00615349	mc00484/mc00817/mc01751/mc02213/mc03749/mc04057/mc04521/mc05042/mc05751/mc05967/mc06254/mc06625/mc06796/mc06982/mc07643/mc08107/mc08284/mc09847/mc09922/mc10487/mc12078/mc12308/mc12949/mc13198/mc14179/mc14415/mc14748/mc14880/mc15024/mc15364/mc16565/mc16870/mc18558/mc19506/mc21620/mc22303/mc22536/mc23901/mc24918/mc25192/mc25865/mc27255/mc27294/mc27451/mc29742/mc30134/mc33404/mc34207/mc34496/mc35058…	57
BP	GO:0040034	regulation of development, heterochronic	47/4415	110/16975	9.90994e-05	0.00693488	0.00615349	mc00487/mc00615/mc00994/mc01110/mc01111/mc03117/mc03351/mc06487/mc06565/mc06684/mc09206/mc09438/mc11317/mc12179/mc14977/mc15083/mc15163/mc15572/mc16158/mc16563/mc16763/mc19097/mc19250/mc19620/mc20373/mc20810/mc26087/mc26651/mc27663/mc27868/mc28349/mc28485/mc29724/mc30152/mc31288/mc31634/mc32549/mc32697/mc33732/mc33733/mc34210/mc34862/mc35198/mc35488/mc37304/mc39130/mc39347	47
BP	GO:0006890	retrograde vesicle-mediated transport, Golgi to endoplasmic reticulum	28/4415	56/16975	0.000101255	0.00693488	0.00615349	mc03732/mc04897/mc05249/mc05638/mc07960/mc09819/mc12979/mc13555/mc13563/mc15897/mc20110/mc22350/mc23056/mc23066/mc23803/mc24284/mc24362/mc26841/mc27690/mc29403/mc29473/mc30652/mc30730/mc32344/mc37989/mc38078/mc38595/mc39296	28
BP	GO:0031053	primary miRNA processing	14/4415	21/16975	0.000107591	0.00720861	0.00639638	mc04133/mc08190/mc15677/mc18235/mc19860/mc25490/mc25749/mc25896/mc29800/mc30006/mc33371/mc33527/mc36356/mc40420	14
BP	GO:0032956	regulation of actin cytoskeleton organization	47/4415	111/16975	0.000128962	0.00826249	0.00733152	mc00522/mc00667/mc02254/mc02433/mc02476/mc06516/mc06754/mc08523/mc08565/mc10305/mc10888/mc12486/mc12700/mc12729/mc12738/mc13019/mc13601/mc14908/mc15134/mc15953/mc16749/mc17698/mc17880/mc18719/mc20163/mc21798/mc22043/mc22076/mc22086/mc22455/mc23108/mc24161/mc24338/mc24962/mc26028/mc26819/mc27477/mc28821/mc31072/mc32381/mc33226/mc34246/mc35273/mc35734/mc35962/mc38214/mc40435	47
BP	GO:0030587	sorocarp development	27/4415	54/16975	0.000134044	0.00826249	0.00733152	mc02476/mc03813/mc04596/mc07714/mc08565/mc09908/mc10888/mc11652/mc12473/mc12700/mc17323/mc17768/mc18719/mc21787/mc22043/mc25206/mc25636/mc25825/mc28821/mc29060/mc30333/mc31072/mc32902/mc33444/mc33662/mc35823/mc40124	27
BP	GO:0090702	non-reproductive fruiting body development	27/4415	54/16975	0.000134044	0.00826249	0.00733152	mc02476/mc03813/mc04596/mc07714/mc08565/mc09908/mc10888/mc11652/mc12473/mc12700/mc17323/mc17768/mc18719/mc21787/mc22043/mc25206/mc25636/mc25825/mc28821/mc29060/mc30333/mc31072/mc32902/mc33444/mc33662/mc35823/mc40124	27
BP	GO:0099120	socially cooperative development	27/4415	54/16975	0.000134044	0.00826249	0.00733152	mc02476/mc03813/mc04596/mc07714/mc08565/mc09908/mc10888/mc11652/mc12473/mc12700/mc17323/mc17768/mc18719/mc21787/mc22043/mc25206/mc25636/mc25825/mc28821/mc29060/mc30333/mc31072/mc32902/mc33444/mc33662/mc35823/mc40124	27
BP	GO:0042546	cell wall biogenesis	114/4415	324/16975	0.000141108	0.00852737	0.00756655	mc00524/mc00751/mc00760/mc00930/mc01033/mc01046/mc01096/mc01279/mc01297/mc01427/mc01553/mc01618/mc03877/mc03969/mc04018/mc04585/mc04590/mc04705/mc04978/mc05203/mc05268/mc05435/mc05625/mc06043/mc07163/mc07701/mc07705/mc07808/mc08052/mc08315/mc08382/mc10202/mc10340/mc10698/mc11110/mc11386/mc11654/mc11762/mc11783/mc11963/mc12373/mc12429/mc12472/mc12653/mc12814/mc12979/mc13372/mc13929/mc14102/mc16204…	114
BP	GO:0043112	receptor metabolic process	12/4415	17/16975	0.000149968	0.00888847	0.00788696	mc01037/mc05678/mc06682/mc12540/mc14464/mc14978/mc21878/mc25130/mc28146/mc31812/mc33667/mc40070	12
BP	GO:0031329	regulation of cellular catabolic process	84/4415	227/16975	0.000157801	0.00917629	0.00814236	mc00476/mc00612/mc00817/mc01041/mc01328/mc01811/mc01851/mc02365/mc03461/mc03603/mc04856/mc05745/mc06181/mc06220/mc06625/mc06636/mc06796/mc07919/mc08471/mc09555/mc09706/mc10539/mc10952/mc11716/mc11765/mc11876/mc12949/mc13019/mc13636/mc14405/mc14880/mc15014/mc15024/mc15394/mc15430/mc16012/mc17077/mc17203/mc17253/mc18468/mc18558/mc18788/mc20210/mc22303/mc22455/mc23125/mc23887/mc25669/mc26418/mc26542…	84
BP	GO:0009909	regulation of flower development	96/4415	266/16975	0.000163471	0.00932994	0.00827869	mc00427/mc01175/mc01936/mc03522/mc04000/mc05378/mc05523/mc06012/mc06023/mc06146/mc06212/mc06426/mc06733/mc07027/mc08337/mc09621/mc10062/mc10180/mc10614/mc10703/mc10792/mc10870/mc11122/mc11297/mc11317/mc11473/mc11584/mc11876/mc11955/mc12201/mc12511/mc12523/mc13079/mc13573/mc13873/mc13973/mc14122/mc14133/mc14546/mc14690/mc14931/mc15212/mc15401/mc15719/mc15720/mc16368/mc17077/mc17392/mc17481/mc18639…	96
BP	GO:0032970	regulation of actin filament-based process	47/4415	112/16975	0.000166748	0.00934397	0.00829115	mc00522/mc00667/mc02254/mc02433/mc02476/mc06516/mc06754/mc08523/mc08565/mc10305/mc10888/mc12486/mc12700/mc12729/mc12738/mc13019/mc13601/mc14908/mc15134/mc15953/mc16749/mc17698/mc17880/mc18719/mc20163/mc21798/mc22043/mc22076/mc22086/mc22455/mc23108/mc24161/mc24338/mc24962/mc26028/mc26819/mc27477/mc28821/mc31072/mc32381/mc33226/mc34246/mc35273/mc35734/mc35962/mc38214/mc40435	47
BP	GO:0000188	inactivation of MAPK activity	10/4415	13/16975	0.000179691	0.00938655	0.00832892	mc03693/mc06055/mc09790/mc11200/mc11910/mc14085/mc17049/mc18984/mc29293/mc30532	10
BP	GO:0043407	negative regulation of MAP kinase activity	10/4415	13/16975	0.000179691	0.00938655	0.00832892	mc03693/mc06055/mc09790/mc11200/mc11910/mc14085/mc17049/mc18984/mc29293/mc30532	10
BP	GO:0060491	regulation of cell projection assembly	10/4415	13/16975	0.000179691	0.00938655	0.00832892	mc02254/mc06983/mc12729/mc14746/mc17880/mc22076/mc24962/mc29060/mc30333/mc35962	10
BP	GO:0120032	regulation of plasma membrane bounded cell projection assembly	10/4415	13/16975	0.000179691	0.00938655	0.00832892	mc02254/mc06983/mc12729/mc14746/mc17880/mc22076/mc24962/mc29060/mc30333/mc35962	10
BP	GO:0090696	post-embryonic plant organ development	120/4415	346/16975	0.000189109	0.00971388	0.00861937	mc00124/mc00163/mc00427/mc00430/mc00972/mc00994/mc01110/mc01396/mc01672/mc02053/mc03117/mc03359/mc03385/mc04304/mc04704/mc04728/mc05025/mc06201/mc06268/mc06457/mc06487/mc06684/mc07432/mc07807/mc07833/mc08088/mc09206/mc09448/mc09482/mc10681/mc10898/mc11933/mc12201/mc12340/mc12512/mc12634/mc12994/mc13022/mc13288/mc13296/mc14977/mc15163/mc15190/mc15353/mc15416/mc15751/mc16307/mc17027/mc18091/mc18385…	120
BP	GO:0031348	negative regulation of defense response	38/4415	86/16975	0.000193671	0.00976487	0.00866462	mc02454/mc03522/mc04714/mc05834/mc06055/mc07817/mc08543/mc09621/mc10652/mc12169/mc12559/mc14085/mc14298/mc16771/mc19752/mc21858/mc23505/mc23900/mc25194/mc25248/mc26077/mc26257/mc26641/mc27280/mc28951/mc28987/mc29730/mc30143/mc30257/mc30284/mc32571/mc32879/mc33169/mc38487/mc39005/mc39584/mc40113/mc40166	38
BP	GO:0022411	cellular component disassembly	56/4415	140/16975	0.000196438	0.00976487	0.00866462	mc00732/mc01588/mc04265/mc04447/mc05249/mc05638/mc06716/mc06754/mc07399/mc07572/mc12486/mc13483/mc13599/mc13636/mc14908/mc14953/mc15693/mc15953/mc16413/mc17698/mc19535/mc19865/mc20163/mc20633/mc21798/mc22986/mc23099/mc23125/mc23596/mc25081/mc25103/mc25669/mc25704/mc26028/mc26418/mc26819/mc26871/mc27255/mc28557/mc29730/mc30143/mc31398/mc32319/mc32381/mc33048/mc33226/mc33579/mc33613/mc34672/mc34954…	56
BP	GO:0048354	mucilage biosynthetic process involved in seed coat development	17/4415	29/16975	0.000203193	0.00994031	0.00882029	mc04585/mc07701/mc10456/mc12373/mc12551/mc16611/mc21698/mc21867/mc23648/mc25433/mc26391/mc26393/mc27713/mc33021/mc33023/mc38801/mc39276	17
BP	GO:0002832	negative regulation of response to biotic stimulus	24/4415	47/16975	0.000206635	0.00995075	0.00882955	mc02454/mc03522/mc04714/mc07817/mc08543/mc09621/mc10652/mc12559/mc19752/mc21858/mc23505/mc23900/mc25194/mc26257/mc27280/mc28987/mc29730/mc30143/mc30284/mc32879/mc38487/mc39005/mc39584/mc40113	24
BP	GO:0048508	embryonic meristem development	33/4415	72/16975	0.000217394	0.0103078	0.0091464	mc00487/mc01288/mc05702/mc05776/mc06649/mc12397/mc12572/mc12634/mc12976/mc14350/mc14434/mc15002/mc21717/mc21889/mc21969/mc22346/mc24011/mc26156/mc26342/mc27350/mc27671/mc29277/mc29724/mc29752/mc30114/mc30152/mc30519/mc32759/mc33906/mc34210/mc38357/mc39315/mc39656	33
BP	GO:0035335	peptidyl-tyrosine dephosphorylation	14/4415	22/16975	0.000224989	0.0105063	0.00932249	mc03032/mc03693/mc06055/mc09110/mc09790/mc11200/mc11910/mc14085/mc17049/mc18984/mc19590/mc29060/mc30333/mc35442	14
BP	GO:0060284	regulation of cell development	57/4415	144/16975	0.0002397	0.0110262	0.00978382	mc00484/mc01751/mc03749/mc04057/mc04993/mc05862/mc05960/mc06254/mc06982/mc08061/mc08284/mc09847/mc09922/mc10065/mc11529/mc11736/mc12078/mc12308/mc13019/mc13198/mc14182/mc14266/mc14748/mc15364/mc16870/mc17234/mc17433/mc19132/mc19350/mc21187/mc21620/mc22455/mc22536/mc23482/mc24314/mc25007/mc25865/mc26896/mc27294/mc27451/mc28030/mc29665/mc29730/mc30143/mc30240/mc31949/mc32291/mc33404/mc34207/mc34496…	57
BP	GO:0045824	negative regulation of innate immune response	16/4415	27/16975	0.000263273	0.0119201	0.010577	mc03522/mc09621/mc10652/mc12559/mc19752/mc21858/mc23505/mc25194/mc26257/mc28987/mc29730/mc30143/mc30284/mc32879/mc39005/mc40113	16
BP	GO:0033014	tetrapyrrole biosynthetic process	41/4415	96/16975	0.000270795	0.0119201	0.010577	mc00364/mc01423/mc01851/mc02708/mc03893/mc04462/mc04527/mc04550/mc05449/mc05765/mc05936/mc06776/mc07589/mc07633/mc07646/mc07675/mc08812/mc09222/mc10865/mc12959/mc14207/mc14424/mc14886/mc15937/mc17727/mc18702/mc20141/mc22323/mc24415/mc27592/mc28414/mc30592/mc31479/mc31564/mc31953/mc34035/mc34196/mc34383/mc35752/mc38042/mc39963	41
BP	GO:1903312	negative regulation of mRNA metabolic process	23/4415	45/16975	0.000274017	0.0119201	0.010577	mc00476/mc00612/mc01041/mc03603/mc06625/mc09706/mc11716/mc13019/mc14139/mc15024/mc17253/mc18558/mc19535/mc22455/mc24212/mc28987/mc30284/mc33672/mc34203/mc35192/mc35596/mc35686/mc38159	23
BP	GO:0008154	actin polymerization or depolymerization	43/4415	102/16975	0.000274603	0.0119201	0.010577	mc00522/mc00667/mc02433/mc02476/mc06516/mc06754/mc08523/mc08565/mc10305/mc10888/mc12486/mc12700/mc13601/mc14908/mc15134/mc15693/mc15953/mc16749/mc17698/mc18719/mc19865/mc20163/mc21798/mc22043/mc23108/mc24338/mc25704/mc26028/mc26819/mc27056/mc27477/mc28821/mc29060/mc30333/mc31072/mc32108/mc32381/mc33226/mc33579/mc34246/mc35273/mc35734/mc40435	43
BP	GO:0010647	positive regulation of cell communication	100/4415	283/16975	0.000294025	0.0125859	0.0111678	mc00428/mc00473/mc00605/mc01483/mc02633/mc02908/mc02978/mc03258/mc03646/mc03749/mc04057/mc04610/mc04929/mc05272/mc05611/mc06254/mc06440/mc06636/mc07729/mc07987/mc08284/mc08747/mc09038/mc09054/mc09365/mc09744/mc09847/mc09922/mc10118/mc11417/mc11529/mc12340/mc12849/mc12958/mc12972/mc13107/mc13414/mc13581/mc15014/mc15205/mc15364/mc16349/mc17433/mc17539/mc17838/mc18182/mc19506/mc20540/mc21229/mc21665…	100
BP	GO:0045492	xylan biosynthetic process	24/4415	48/16975	0.000312031	0.0130553	0.0115843	mc00524/mc00930/mc01427/mc04585/mc04590/mc06043/mc07701/mc07705/mc10340/mc11110/mc14102/mc16204/mc16731/mc17969/mc18899/mc19500/mc20413/mc29811/mc30021/mc34043/mc34249/mc34928/mc36042/mc36729	24
BP	GO:0009880	embryonic pattern specification	28/4415	59/16975	0.000313462	0.0130553	0.0115843	mc01288/mc01885/mc02120/mc02213/mc04429/mc07551/mc11047/mc11904/mc11933/mc12889/mc17027/mc17054/mc17802/mc18839/mc22243/mc24826/mc24918/mc27671/mc29237/mc29498/mc29881/mc29964/mc30479/mc30774/mc33906/mc34347/mc35846/mc39315	28
BP	GO:0071345	cellular response to cytokine stimulus	19/4415	35/16975	0.000341666	0.0137357	0.012188	mc06181/mc07107/mc10735/mc11716/mc12101/mc12180/mc12575/mc15430/mc16762/mc16843/mc17253/mc19647/mc21891/mc26154/mc28987/mc29446/mc30284/mc30696/mc32755	19
BP	GO:0098630	aggregation of unicellular organisms	12/4415	18/16975	0.000343169	0.0137357	0.012188	mc02476/mc08565/mc12700/mc16318/mc20512/mc22043/mc25636/mc28821/mc29060/mc30333/mc31072/mc33662	12
BP	GO:0098743	cell aggregation	12/4415	18/16975	0.000343169	0.0137357	0.012188	mc02476/mc08565/mc12700/mc16318/mc20512/mc22043/mc25636/mc28821/mc29060/mc30333/mc31072/mc33662	12
BP	GO:0022008	neurogenesis	45/4415	109/16975	0.000352213	0.0139169	0.0123488	mc00484/mc01751/mc02213/mc03749/mc04057/mc04521/mc05042/mc05751/mc06254/mc06625/mc06982/mc07643/mc08107/mc08284/mc09847/mc09922/mc12078/mc12308/mc13198/mc14415/mc14748/mc15024/mc15364/mc16870/mc18558/mc19506/mc21620/mc22536/mc23901/mc24918/mc25192/mc25865/mc27294/mc27451/mc29742/mc30134/mc33404/mc34207/mc34496/mc35596/mc36726/mc38486/mc39597/mc39764/mc40110	45
BP	GO:0090316	positive regulation of intracellular protein transport	22/4415	43/16975	0.000363623	0.0141859	0.0125875	mc02254/mc04247/mc05674/mc06110/mc07378/mc10118/mc12729/mc14015/mc14473/mc17880/mc21229/mc22076/mc23617/mc24962/mc26365/mc26625/mc29730/mc30143/mc32591/mc33002/mc35962/mc38866	22
BP	GO:1903829	positive regulation of cellular protein localization	26/4415	54/16975	0.000382516	0.0147364	0.013076	mc02254/mc04247/mc05674/mc06110/mc07378/mc10118/mc12729/mc12898/mc14015/mc14473/mc17880/mc21229/mc22076/mc22255/mc23617/mc24962/mc26365/mc26625/mc28814/mc29730/mc30143/mc31077/mc32591/mc33002/mc35962/mc38866	26
BP	GO:0051130	positive regulation of cellular component organization	82/4415	226/16975	0.000388501	0.0147822	0.0131167	mc00522/mc00667/mc01037/mc01811/mc02254/mc02433/mc03142/mc03461/mc04304/mc04550/mc05745/mc06254/mc06617/mc06746/mc06982/mc07432/mc07675/mc08523/mc09231/mc09555/mc09961/mc10118/mc10305/mc10539/mc12078/mc12308/mc12486/mc12729/mc12738/mc12949/mc13019/mc13930/mc14405/mc14748/mc14916/mc15031/mc15364/mc16012/mc16749/mc16870/mc17698/mc17880/mc19281/mc20210/mc21017/mc21075/mc21229/mc21620/mc21798/mc22076…	82
BP	GO:0031346	positive regulation of cell projection organization	14/4415	23/16975	0.000437462	0.0164422	0.0145896	mc02254/mc06982/mc12078/mc12308/mc12729/mc14748/mc16870/mc17880/mc21620/mc22076/mc24962/mc27451/mc35962/mc39764	14
BP	GO:0048699	generation of neurons	39/4415	92/16975	0.000452414	0.0166655	0.0147877	mc00484/mc01751/mc02213/mc03749/mc04057/mc04521/mc05042/mc05751/mc06254/mc06982/mc07643/mc08107/mc08284/mc09847/mc09922/mc12078/mc12308/mc13198/mc14415/mc14748/mc15364/mc16870/mc19506/mc21620/mc22536/mc23901/mc24918/mc25192/mc25865/mc27294/mc27451/mc33404/mc34207/mc34496/mc36726/mc38486/mc39597/mc39764/mc40110	39
BP	GO:0048831	regulation of shoot system development	139/4415	417/16975	0.000454219	0.0166655	0.0147877	mc00427/mc01175/mc01672/mc01936/mc03007/mc03059/mc03522/mc04000/mc04714/mc05013/mc05185/mc05378/mc05523/mc05999/mc06012/mc06023/mc06146/mc06212/mc06426/mc06733/mc07027/mc07150/mc07817/mc08078/mc08337/mc09083/mc09138/mc09621/mc10062/mc10180/mc10614/mc10703/mc10792/mc10870/mc11122/mc11190/mc11297/mc11317/mc11473/mc11584/mc11876/mc11955/mc12201/mc12511/mc12523/mc12551/mc13063/mc13079/mc13573/mc13873…	139
BP	GO:0046839	phospholipid dephosphorylation	21/4415	41/16975	0.000482891	0.0175091	0.0155362	mc01471/mc03790/mc03847/mc09878/mc11243/mc12364/mc16043/mc18370/mc19036/mc20237/mc21693/mc25157/mc27350/mc29060/mc29586/mc30333/mc30844/mc34811/mc36520/mc38310/mc39656	21
BP	GO:0009832	plant-type cell wall biogenesis	92/4415	261/16975	0.000549816	0.0192333	0.0170662	mc00930/mc01033/mc01046/mc01096/mc01279/mc01297/mc01427/mc01618/mc03877/mc04018/mc04585/mc04590/mc04705/mc05203/mc05268/mc05435/mc05625/mc06043/mc07163/mc07701/mc07705/mc07808/mc08315/mc10202/mc10340/mc10698/mc11386/mc11654/mc11762/mc11783/mc11963/mc12373/mc12429/mc12472/mc12653/mc12979/mc13372/mc13929/mc14102/mc16204/mc16731/mc17005/mc17182/mc17206/mc17322/mc17565/mc17969/mc18226/mc19145/mc19500…	92
BP	GO:0005986	sucrose biosynthetic process	8/4415	10/16975	0.000555407	0.0192333	0.0170662	mc10257/mc11139/mc18928/mc21439/mc26060/mc29888/mc29956/mc33201	8
BP	GO:0010594	regulation of endothelial cell migration	8/4415	10/16975	0.000555407	0.0192333	0.0170662	mc02254/mc12729/mc17880/mc22076/mc24962/mc29730/mc30143/mc35962	8
BP	GO:0070935	3'-UTR-mediated mRNA stabilization	8/4415	10/16975	0.000555407	0.0192333	0.0170662	mc00476/mc00612/mc01041/mc13019/mc22455/mc33672/mc34203/mc35192	8
BP	GO:0007017	microtubule-based process	107/4415	311/16975	0.000567237	0.0194247	0.017236	mc00794/mc01000/mc01070/mc01280/mc01816/mc02254/mc02255/mc03100/mc03104/mc04596/mc04682/mc05249/mc05268/mc05625/mc05638/mc07031/mc07106/mc07714/mc07786/mc09178/mc09185/mc09522/mc10008/mc10373/mc10551/mc11155/mc11528/mc11731/mc11765/mc12201/mc12639/mc12729/mc12791/mc12949/mc12979/mc13176/mc13393/mc13896/mc14607/mc14686/mc15470/mc16031/mc16379/mc16461/mc16484/mc16686/mc17203/mc17238/mc17434/mc17880…	107
BP	GO:0007015	actin filament organization	55/4415	142/16975	0.000574062	0.0194424	0.0172518	mc00522/mc00667/mc00750/mc01998/mc02354/mc02433/mc02476/mc06516/mc06754/mc06983/mc08455/mc08523/mc08565/mc10305/mc10888/mc12486/mc12700/mc13601/mc14746/mc14908/mc15134/mc15693/mc15953/mc16749/mc17698/mc18719/mc19865/mc20163/mc21798/mc22043/mc23108/mc23694/mc24338/mc24697/mc25339/mc25704/mc26028/mc26819/mc27056/mc27477/mc28821/mc29060/mc30333/mc31072/mc32108/mc32381/mc33226/mc33579/mc34246/mc34984…	55
BP	GO:0006779	porphyrin-containing compound biosynthetic process	39/4415	93/16975	0.000585874	0.0196268	0.0174153	mc00364/mc01423/mc01851/mc02708/mc03893/mc04462/mc04527/mc04550/mc05449/mc05936/mc06776/mc07589/mc07633/mc07646/mc07675/mc08812/mc09222/mc10865/mc12959/mc14207/mc14886/mc15937/mc17727/mc18702/mc20141/mc22323/mc24415/mc27592/mc28414/mc30592/mc31479/mc31564/mc31953/mc34035/mc34196/mc34383/mc35752/mc38042/mc39963	39
BP	GO:0048527	lateral root development	74/4415	203/16975	0.000622322	0.0206236	0.0182999	mc00124/mc00430/mc00972/mc01110/mc01396/mc01672/mc02053/mc03359/mc04304/mc05025/mc06201/mc06268/mc06457/mc07432/mc08088/mc09448/mc10681/mc10898/mc11933/mc12634/mc12994/mc13022/mc13288/mc13296/mc15190/mc15353/mc15416/mc15751/mc17027/mc18385/mc18726/mc19716/mc19932/mc21969/mc22390/mc22457/mc22759/mc22775/mc23882/mc24011/mc24414/mc24482/mc24756/mc25090/mc26428/mc26843/mc26853/mc27321/mc27958/mc28546…	74
BP	GO:0051302	regulation of cell division	56/4415	146/16975	0.000680336	0.0223063	0.019793	mc00124/mc00994/mc01321/mc03117/mc03403/mc03813/mc04951/mc06487/mc06506/mc06684/mc07031/mc08021/mc09206/mc09503/mc09908/mc10373/mc11155/mc11789/mc12238/mc12738/mc12949/mc14686/mc14977/mc15143/mc15163/mc16307/mc16686/mc17177/mc17673/mc18091/mc18945/mc20502/mc21531/mc22086/mc22303/mc23482/mc23882/mc24161/mc24482/mc25119/mc25972/mc26651/mc28024/mc28349/mc31634/mc31957/mc32549/mc33277/mc33946/mc34862…	56
BP	GO:0000226	microtubule cytoskeleton organization	79/4415	220/16975	0.000701188	0.022748	0.0201849	mc00794/mc01070/mc01280/mc01816/mc02254/mc03100/mc03104/mc04596/mc04682/mc05249/mc05268/mc05625/mc05638/mc07031/mc07714/mc07786/mc09178/mc09185/mc10008/mc10373/mc11155/mc11528/mc11731/mc11765/mc12201/mc12729/mc12949/mc12979/mc13176/mc13393/mc14686/mc16379/mc16686/mc17203/mc17238/mc17434/mc17880/mc18207/mc18945/mc20579/mc21113/mc21496/mc22076/mc22303/mc22350/mc22590/mc22873/mc23482/mc23596/mc24962…	79
BP	GO:0009723	response to ethylene	116/4415	343/16975	0.000711708	0.0228354	0.0202624	mc00052/mc00124/mc00994/mc01175/mc01265/mc01458/mc01543/mc02543/mc03117/mc03367/mc03385/mc03552/mc03569/mc03646/mc03991/mc04137/mc05065/mc05273/mc05610/mc06201/mc06457/mc06487/mc06684/mc07016/mc07094/mc07107/mc07347/mc08184/mc08347/mc08627/mc09206/mc09482/mc09647/mc09662/mc09744/mc10046/mc10681/mc11584/mc11617/mc12067/mc12958/mc13031/mc13367/mc13792/mc13951/mc14623/mc14703/mc14977/mc15163/mc15190…	116
BP	GO:0034976	response to endoplasmic reticulum stress	54/4415	140/16975	0.000719418	0.0228354	0.0202624	mc00534/mc00817/mc01674/mc01695/mc01811/mc01874/mc02184/mc02978/mc03518/mc04013/mc04509/mc04566/mc05745/mc06796/mc07635/mc07684/mc08319/mc09054/mc09613/mc10263/mc10539/mc12382/mc13060/mc13636/mc14405/mc14880/mc15506/mc15829/mc19558/mc20024/mc20893/mc21448/mc21703/mc22487/mc23125/mc24889/mc25810/mc27013/mc28549/mc28779/mc28899/mc29483/mc30740/mc30976/mc31117/mc31388/mc32150/mc33461/mc34257/mc34357…	54
BP	GO:0051703	biological process involved in intraspecies interaction between organisms	33/4415	76/16975	0.000726109	0.0228354	0.0202624	mc01998/mc02476/mc03813/mc04596/mc07714/mc08565/mc09908/mc10888/mc11652/mc12473/mc12700/mc16318/mc17323/mc17768/mc18719/mc20512/mc21787/mc22043/mc24697/mc25206/mc25636/mc25825/mc28748/mc28821/mc29060/mc30333/mc31072/mc31148/mc32902/mc33444/mc33662/mc35823/mc40124	33
BP	GO:0010243	response to organonitrogen compound	159/4415	490/16975	0.000737801	0.0229687	0.0203807	mc00402/mc00428/mc00534/mc00817/mc01018/mc01543/mc01695/mc01729/mc01811/mc01874/mc01936/mc02184/mc02476/mc02566/mc02677/mc02978/mc03074/mc03552/mc03646/mc03991/mc04247/mc04432/mc04500/mc04588/mc04610/mc04685/mc04705/mc04845/mc04950/mc05745/mc05834/mc06114/mc06636/mc06796/mc06920/mc07213/mc07378/mc07555/mc07628/mc07702/mc07729/mc07789/mc07911/mc08019/mc08347/mc08565/mc08659/mc08693/mc09054/mc09647…	159
BP	GO:0043408	regulation of MAPK cascade	26/4415	56/16975	0.000771515	0.0237781	0.0210989	mc00428/mc03258/mc03693/mc04353/mc04610/mc06055/mc07470/mc07729/mc09365/mc09790/mc11200/mc11529/mc11910/mc14085/mc16349/mc17049/mc17433/mc18984/mc20540/mc26263/mc29293/mc29730/mc30143/mc30532/mc32884/mc34119	26
BP	GO:0031146	SCF-dependent proteasomal ubiquitin-dependent protein catabolic process	14/4415	24/16975	0.00079928	0.0243899	0.0216418	mc00235/mc02402/mc06514/mc06535/mc08492/mc15116/mc15136/mc24559/mc28105/mc28667/mc29730/mc30143/mc31239/mc31874	14
BP	GO:0030010	establishment of cell polarity	22/4415	45/16975	0.000813758	0.0245883	0.0218178	mc01885/mc02254/mc06516/mc12729/mc13601/mc15134/mc17802/mc17880/mc22076/mc23108/mc24962/mc26910/mc27591/mc29060/mc29881/mc29964/mc30333/mc32278/mc34347/mc35846/mc35962/mc39958	22
BP	GO:0010200	response to chitin	94/4415	271/16975	0.000880291	0.0263404	0.0233725	mc00402/mc01018/mc01729/mc02184/mc02677/mc02978/mc03074/mc03552/mc03646/mc03991/mc04432/mc04500/mc04588/mc04610/mc04705/mc04845/mc04950/mc05834/mc06114/mc06920/mc07213/mc07555/mc07628/mc07702/mc07729/mc07911/mc08019/mc08347/mc08693/mc09054/mc09647/mc09744/mc09985/mc10833/mc11117/mc11617/mc12958/mc12999/mc14011/mc14298/mc14529/mc14780/mc15458/mc15607/mc15704/mc15792/mc15825/mc16349/mc17360/mc18660…	94
BP	GO:0051301	cell division	138/4415	420/16975	0.000919259	0.0271231	0.024067	mc00124/mc00732/mc00994/mc01321/mc01563/mc02476/mc02729/mc03117/mc03403/mc03522/mc03749/mc03813/mc03832/mc04057/mc04304/mc04682/mc04951/mc05053/mc05405/mc05867/mc06112/mc06125/mc06487/mc06506/mc06684/mc07031/mc07432/mc07786/mc08021/mc08125/mc08284/mc08565/mc08835/mc09206/mc09503/mc09621/mc09847/mc09908/mc09922/mc10373/mc11155/mc11344/mc11762/mc11789/mc11933/mc12238/mc12653/mc12700/mc12738/mc12949…	138
BP	GO:0045944	positive regulation of transcription by RNA polymerase II	76/4415	212/16975	0.000924052	0.0271231	0.024067	mc01118/mc01811/mc02254/mc02269/mc03830/mc04030/mc04509/mc04699/mc05402/mc05745/mc06050/mc06212/mc06254/mc06539/mc07635/mc07802/mc08305/mc10163/mc10539/mc10944/mc11221/mc12523/mc12711/mc12729/mc13442/mc13930/mc14096/mc14405/mc15110/mc15364/mc15401/mc15507/mc16012/mc16318/mc16392/mc17880/mc18173/mc18399/mc18782/mc19013/mc19238/mc19281/mc20210/mc20512/mc20590/mc20884/mc21017/mc21272/mc21837/mc22056…	76
BP	GO:0051493	regulation of cytoskeleton organization	51/4415	132/16975	0.000951745	0.0276724	0.0245544	mc00522/mc00667/mc02254/mc02433/mc02476/mc03100/mc06516/mc06754/mc08523/mc08565/mc09178/mc10305/mc10888/mc11155/mc12486/mc12700/mc12729/mc12738/mc13019/mc13601/mc14908/mc15134/mc15953/mc16749/mc17698/mc17880/mc18719/mc18945/mc20163/mc21798/mc22043/mc22076/mc22086/mc22455/mc23108/mc24161/mc24338/mc24962/mc26028/mc26819/mc27477/mc28821/mc31072/mc32381/mc33226/mc34246/mc35273/mc35734/mc35962/mc38214…	51
BP	GO:0043405	regulation of MAP kinase activity	20/4415	40/16975	0.000972224	0.0280037	0.0248484	mc00428/mc03258/mc03693/mc04610/mc06055/mc07729/mc09365/mc09790/mc11200/mc11529/mc11910/mc14085/mc16349/mc17049/mc17433/mc18984/mc20540/mc29293/mc30532/mc34119	20
BP	GO:0034097	response to cytokine	25/4415	54/16975	0.00101844	0.0290634	0.0257887	mc05689/mc06181/mc07107/mc10735/mc11716/mc12101/mc12180/mc12575/mc13198/mc14332/mc15430/mc16762/mc16843/mc17253/mc19647/mc21891/mc22536/mc25865/mc26154/mc28987/mc29446/mc30284/mc30696/mc32755/mc33404	25
BP	GO:0031589	cell-substrate adhesion	13/4415	22/16975	0.00104327	0.0294253	0.0261098	mc02254/mc12473/mc12729/mc16318/mc17880/mc20512/mc21787/mc22076/mc24962/mc25206/mc32902/mc35962/mc40124	13
BP	GO:0060429	epithelium development	47/4415	120/16975	0.00105281	0.0294253	0.0261098	mc01751/mc01998/mc02213/mc03749/mc04057/mc05678/mc06371/mc06682/mc08284/mc09847/mc09922/mc10487/mc11731/mc11933/mc12949/mc13019/mc14464/mc14978/mc15261/mc16077/mc16565/mc17027/mc17238/mc17673/mc18267/mc20280/mc22303/mc22455/mc23482/mc24697/mc24918/mc26574/mc26641/mc27255/mc27389/mc29255/mc29783/mc29987/mc30496/mc32571/mc32641/mc34496/mc35417/mc36382/mc39072/mc39558/mc39695	47
BP	GO:0010631	epithelial cell migration	10/4415	15/16975	0.0011075	0.0294253	0.0261098	mc02213/mc02254/mc12729/mc17880/mc22076/mc24918/mc24962/mc29730/mc30143/mc35962	10
BP	GO:0046847	filopodium assembly	10/4415	15/16975	0.0011075	0.0294253	0.0261098	mc02254/mc02476/mc08565/mc12700/mc12729/mc17880/mc22043/mc22076/mc24962/mc35962	10
BP	GO:0050688	regulation of defense response to virus	10/4415	15/16975	0.0011075	0.0294253	0.0261098	mc00399/mc02978/mc04521/mc07072/mc07643/mc09054/mc14651/mc27280/mc34160/mc39584	10
BP	GO:0080060	integument development	10/4415	15/16975	0.0011075	0.0294253	0.0261098	mc03403/mc09503/mc11789/mc17177/mc19278/mc25972/mc27671/mc33277/mc37221/mc39315	10
BP	GO:0090130	tissue migration	10/4415	15/16975	0.0011075	0.0294253	0.0261098	mc02213/mc02254/mc12729/mc17880/mc22076/mc24918/mc24962/mc29730/mc30143/mc35962	10
BP	GO:0090132	epithelium migration	10/4415	15/16975	0.0011075	0.0294253	0.0261098	mc02213/mc02254/mc12729/mc17880/mc22076/mc24918/mc24962/mc29730/mc30143/mc35962	10
BP	GO:0010016	shoot system morphogenesis	118/4415	354/16975	0.00117115	0.0308502	0.0273741	mc00487/mc00615/mc01672/mc01726/mc02402/mc03059/mc03161/mc03351/mc04286/mc04304/mc04634/mc04714/mc04822/mc04929/mc05013/mc05044/mc05164/mc05272/mc05611/mc05776/mc06506/mc06556/mc06649/mc07270/mc07414/mc07432/mc07633/mc07740/mc07817/mc07891/mc07987/mc08078/mc08109/mc08492/mc09138/mc09243/mc09438/mc10180/mc10445/mc11190/mc12236/mc12634/mc14434/mc15002/mc15093/mc15143/mc15497/mc15596/mc15937/mc16021…	118
BP	GO:0010256	endomembrane system organization	56/4415	149/16975	0.00119637	0.0312474	0.0277266	mc00817/mc02221/mc02254/mc04079/mc06198/mc06237/mc06516/mc06593/mc06796/mc06984/mc08250/mc10834/mc11385/mc12729/mc13601/mc14744/mc14880/mc15056/mc15134/mc15376/mc15418/mc15897/mc17567/mc17824/mc17880/mc18658/mc19346/mc20110/mc22076/mc23108/mc23481/mc23749/mc24006/mc24284/mc24362/mc24930/mc24962/mc26913/mc28447/mc28783/mc28814/mc29760/mc30109/mc31077/mc31112/mc31528/mc32260/mc35058/mc35904/mc35962…	56
BP	GO:0010410	hemicellulose metabolic process	39/4415	96/16975	0.00121755	0.0315335	0.0279805	mc00524/mc00930/mc01096/mc01427/mc01618/mc04400/mc04585/mc04590/mc06043/mc07514/mc07701/mc07705/mc10340/mc11110/mc13929/mc14102/mc16204/mc16731/mc17969/mc18899/mc19500/mc20413/mc20557/mc21019/mc24006/mc28876/mc29760/mc29811/mc30021/mc30109/mc31018/mc33716/mc34043/mc34249/mc34632/mc34928/mc36042/mc36729/mc38360	39
BP	GO:0090558	plant epidermis development	149/4415	461/16975	0.00127354	0.0327089	0.0290234	mc00163/mc00408/mc00751/mc00794/mc01263/mc01563/mc01726/mc01816/mc02327/mc02354/mc02634/mc02729/mc03161/mc03230/mc03259/mc03274/mc03359/mc04079/mc04304/mc04429/mc04822/mc05044/mc05203/mc05268/mc05625/mc06506/mc06630/mc06754/mc06801/mc07163/mc07432/mc07551/mc07891/mc08109/mc08250/mc08455/mc08746/mc08835/mc09243/mc09342/mc09363/mc09394/mc09448/mc10133/mc10163/mc10197/mc10601/mc10870/mc11176/mc11775…	149
BP	GO:0071901	negative regulation of protein serine/threonine kinase activity	14/4415	25/16975	0.00138374	0.0352454	0.0312742	mc03693/mc06055/mc09790/mc11200/mc11910/mc14085/mc15614/mc17049/mc18984/mc20753/mc29060/mc29293/mc30333/mc30532	14
BP	GO:0050767	regulation of neurogenesis	25/4415	55/16975	0.0014109	0.0356425	0.0316265	mc00484/mc01751/mc03749/mc04057/mc06254/mc06982/mc08284/mc09847/mc09922/mc12078/mc12308/mc13198/mc14748/mc15364/mc16870/mc21620/mc22536/mc25865/mc27294/mc27451/mc33404/mc34207/mc34496/mc39597/mc39764	25
BP	GO:0010374	stomatal complex development	39/4415	97/16975	0.0015322	0.0369339	0.0327724	mc00408/mc01726/mc03161/mc03230/mc04304/mc04822/mc05044/mc06506/mc07432/mc07891/mc08109/mc09243/mc09394/mc12982/mc13301/mc15143/mc15596/mc18267/mc20785/mc22371/mc22783/mc25668/mc25825/mc27389/mc28639/mc29195/mc29366/mc29730/mc29862/mc30076/mc30143/mc30457/mc30623/mc31254/mc33444/mc33614/mc34146/mc36382/mc39695	39
BP	GO:0016051	carbohydrate biosynthetic process	129/4415	394/16975	0.00153301	0.0369339	0.0327724	mc00399/mc00524/mc00930/mc01033/mc01213/mc01279/mc01297/mc01427/mc01553/mc02432/mc03278/mc04290/mc04462/mc04585/mc04590/mc05013/mc05688/mc06043/mc07204/mc07418/mc07589/mc07701/mc07705/mc08078/mc08522/mc09337/mc10257/mc10340/mc11009/mc11110/mc11139/mc11372/mc11946/mc12340/mc12373/mc12429/mc12653/mc12814/mc13365/mc13393/mc13929/mc14102/mc14331/mc14523/mc15781/mc15879/mc16204/mc16731/mc17021/mc17578…	129
BP	GO:0032102	negative regulation of response to external stimulus	28/4415	64/16975	0.00154894	0.0369339	0.0327724	mc02454/mc03522/mc04714/mc07817/mc08543/mc09621/mc10652/mc12559/mc13198/mc19752/mc21858/mc22536/mc23505/mc23900/mc25194/mc25865/mc26257/mc27280/mc28987/mc29730/mc30143/mc30284/mc32879/mc33404/mc38487/mc39005/mc39584/mc40113	28
BP	GO:1903827	regulation of cellular protein localization	38/4415	94/16975	0.00155475	0.0369339	0.0327724	mc02254/mc04247/mc05674/mc06110/mc07378/mc10118/mc12078/mc12729/mc12898/mc14015/mc14473/mc16870/mc17880/mc21229/mc22076/mc22255/mc23617/mc24161/mc24962/mc26365/mc26625/mc27451/mc28079/mc28438/mc28814/mc29083/mc29730/mc30143/mc30356/mc31077/mc31533/mc31906/mc32591/mc33002/mc35962/mc38214/mc38866/mc39764	38
BP	GO:0010810	regulation of cell-substrate adhesion	8/4415	11/16975	0.00156987	0.0369339	0.0327724	mc02254/mc12729/mc16318/mc17880/mc20512/mc22076/mc24962/mc35962	8
BP	GO:0043542	endothelial cell migration	8/4415	11/16975	0.00156987	0.0369339	0.0327724	mc02254/mc12729/mc17880/mc22076/mc24962/mc29730/mc30143/mc35962	8
BP	GO:0043627	response to estrogen	8/4415	11/16975	0.00156987	0.0369339	0.0327724	mc02254/mc02498/mc08583/mc12729/mc17880/mc22076/mc24962/mc35962	8
BP	GO:0048530	fruit morphogenesis	8/4415	11/16975	0.00156987	0.0369339	0.0327724	mc11190/mc12340/mc18977/mc21665/mc23482/mc26439/mc33076/mc39072	8
BP	GO:0071356	cellular response to tumor necrosis factor	8/4415	11/16975	0.00156987	0.0369339	0.0327724	mc12180/mc12575/mc16762/mc21891/mc26154/mc29446/mc30696/mc32755	8
BP	GO:0033157	regulation of intracellular protein transport	30/4415	70/16975	0.00159724	0.0372931	0.0330911	mc02254/mc04247/mc05674/mc06110/mc07378/mc10118/mc12078/mc12729/mc14015/mc14473/mc16870/mc17880/mc21229/mc22076/mc23617/mc24962/mc26365/mc26625/mc27451/mc28079/mc29083/mc29730/mc30143/mc30356/mc31906/mc32591/mc33002/mc35962/mc38866/mc39764	30
BP	GO:0045491	xylan metabolic process	32/4415	76/16975	0.00161696	0.0374697	0.0332479	mc00524/mc00930/mc01096/mc01427/mc01618/mc04400/mc04585/mc04590/mc06043/mc07514/mc07701/mc07705/mc10340/mc11110/mc14102/mc16204/mc16731/mc17969/mc18899/mc19500/mc20413/mc28876/mc29811/mc30021/mc31018/mc33716/mc34043/mc34249/mc34632/mc34928/mc36042/mc36729	32
BP	GO:0031401	positive regulation of protein modification process	72/4415	203/16975	0.00171636	0.0394762	0.0350283	mc00428/mc03258/mc03813/mc04304/mc04353/mc04596/mc04610/mc04670/mc06254/mc06516/mc06617/mc06716/mc06746/mc07432/mc07470/mc07714/mc07729/mc07774/mc09365/mc09908/mc09961/mc10163/mc10718/mc11529/mc12575/mc13107/mc13143/mc13233/mc13601/mc13636/mc14916/mc14953/mc15031/mc15134/mc15364/mc16349/mc17433/mc19281/mc19673/mc20540/mc21075/mc21272/mc21891/mc22623/mc22670/mc22698/mc23108/mc23125/mc23591/mc25825…	72
BP	GO:0045595	regulation of cell differentiation	93/4415	273/16975	0.0017673	0.0402699	0.0357325	mc00484/mc01458/mc01751/mc03749/mc04004/mc04057/mc04993/mc05862/mc05960/mc06254/mc06735/mc06982/mc08061/mc08284/mc08330/mc09847/mc09922/mc10065/mc10339/mc10652/mc11317/mc11529/mc11652/mc11736/mc12078/mc12238/mc12308/mc12555/mc13019/mc13031/mc13198/mc14182/mc14266/mc14748/mc14929/mc15364/mc15851/mc16318/mc16732/mc16870/mc17234/mc17323/mc17433/mc17673/mc18267/mc19097/mc19132/mc19350/mc19535/mc19752…	93
BP	GO:0044038	cell wall macromolecule biosynthetic process	42/4415	107/16975	0.00179762	0.0402699	0.0357325	mc00524/mc00930/mc01033/mc01297/mc01427/mc01553/mc04585/mc04590/mc06043/mc07701/mc07705/mc10340/mc11110/mc12429/mc13929/mc14102/mc16204/mc16731/mc17969/mc18226/mc18899/mc19145/mc19500/mc20413/mc21019/mc21748/mc24006/mc29760/mc29811/mc30021/mc30109/mc33919/mc34043/mc34249/mc34730/mc34828/mc34928/mc36042/mc36352/mc36729/mc37700/mc38360	42
BP	GO:0070589	cellular component macromolecule biosynthetic process	42/4415	107/16975	0.00179762	0.0402699	0.0357325	mc00524/mc00930/mc01033/mc01297/mc01427/mc01553/mc04585/mc04590/mc06043/mc07701/mc07705/mc10340/mc11110/mc12429/mc13929/mc14102/mc16204/mc16731/mc17969/mc18226/mc18899/mc19145/mc19500/mc20413/mc21019/mc21748/mc24006/mc29760/mc29811/mc30021/mc30109/mc33919/mc34043/mc34249/mc34730/mc34828/mc34928/mc36042/mc36352/mc36729/mc37700/mc38360	42
BP	GO:0043161	proteasome-mediated ubiquitin-dependent protein catabolic process	152/4415	475/16975	0.00180313	0.0402699	0.0357325	mc00163/mc00235/mc00534/mc00698/mc00817/mc01018/mc01274/mc01687/mc01695/mc01811/mc01874/mc02402/mc02633/mc02634/mc03007/mc03305/mc03527/mc03806/mc04308/mc04477/mc04670/mc04687/mc05707/mc05745/mc05999/mc06020/mc06371/mc06400/mc06514/mc06535/mc06796/mc06986/mc07212/mc07213/mc07436/mc07606/mc07774/mc07792/mc08492/mc08746/mc08747/mc09083/mc09313/mc09628/mc09897/mc10046/mc10494/mc10539/mc10641/mc10762…	152
BP	GO:0051050	positive regulation of transport	38/4415	95/16975	0.00195063	0.0432507	0.0383775	mc01037/mc01672/mc02254/mc03896/mc04247/mc05452/mc05674/mc06110/mc07378/mc10118/mc12729/mc14015/mc14473/mc16012/mc16340/mc17880/mc20210/mc20530/mc21229/mc22076/mc23617/mc23900/mc24962/mc25130/mc26365/mc26625/mc28146/mc29730/mc30143/mc31812/mc32591/mc33002/mc33667/mc34598/mc35962/mc38487/mc38866/mc40070	38
BP	GO:0030042	actin filament depolymerization	16/4415	31/16975	0.00202306	0.0442277	0.0392444	mc06754/mc12486/mc14908/mc15693/mc15953/mc17698/mc19865/mc20163/mc21798/mc25704/mc26028/mc26819/mc32381/mc33226/mc33579/mc35734	16
BP	GO:0006898	receptor-mediated endocytosis	27/4415	62/16975	0.0020234	0.0442277	0.0392444	mc00750/mc01037/mc01981/mc03847/mc05384/mc05514/mc10034/mc15820/mc19372/mc20014/mc21153/mc24681/mc25130/mc25157/mc26910/mc28146/mc28443/mc29784/mc29988/mc31531/mc31812/mc32278/mc33667/mc34984/mc37035/mc38310/mc40070	27
BP	GO:0030182	neuron differentiation	35/4415	86/16975	0.00203812	0.0442359	0.0392517	mc00484/mc01751/mc02213/mc03749/mc04057/mc04521/mc05042/mc05751/mc06982/mc07643/mc08107/mc08284/mc09847/mc09922/mc12078/mc12308/mc13198/mc14415/mc14748/mc16870/mc19506/mc21620/mc22536/mc24918/mc25192/mc25865/mc27294/mc27451/mc33404/mc34207/mc34496/mc36726/mc39597/mc39764/mc40110	35
BP	GO:0010014	meristem initiation	33/4415	80/16975	0.00207563	0.0447349	0.0396944	mc00487/mc05164/mc05702/mc05776/mc06649/mc07270/mc07633/mc11047/mc11663/mc12634/mc14350/mc14434/mc15002/mc15937/mc17311/mc18500/mc18839/mc20141/mc21969/mc24011/mc24415/mc26342/mc27671/mc29277/mc29724/mc29752/mc30114/mc30152/mc30519/mc34210/mc38042/mc38357/mc39315	33
BP	GO:0010192	mucilage biosynthetic process	21/4415	45/16975	0.00222542	0.0476301	0.0422634	mc04069/mc04585/mc07701/mc08273/mc10456/mc12373/mc12551/mc16611/mc21698/mc21867/mc23648/mc25433/mc26391/mc26393/mc27713/mc28062/mc31917/mc33021/mc33023/mc38801/mc39276	21
BP	GO:0031152	aggregation involved in sorocarp development	10/4415	16/16975	0.00226579	0.0478299	0.0424407	mc02476/mc08565/mc12700/mc22043/mc25636/mc28821/mc29060/mc30333/mc31072/mc33662	10
BP	GO:0043409	negative regulation of MAPK cascade	10/4415	16/16975	0.00226579	0.0478299	0.0424407	mc03693/mc06055/mc09790/mc11200/mc11910/mc14085/mc17049/mc18984/mc29293/mc30532	10
BP	GO:0017145	stem cell division	14/4415	26/16975	0.00228522	0.0479119	0.0425135	mc00994/mc01321/mc03117/mc06487/mc06684/mc09206/mc14977/mc15163/mc26651/mc28349/mc31634/mc32549/mc33946/mc34862	14
BP	GO:0051261	protein depolymerization	22/4415	48/16975	0.00234757	0.0488865	0.0433783	mc05249/mc05638/mc06754/mc12486/mc14908/mc15693/mc15953/mc17698/mc19865/mc20163/mc21798/mc23596/mc25704/mc26028/mc26819/mc28557/mc31398/mc32381/mc33226/mc33579/mc35734/mc38897	22
BP	GO:0010638	positive regulation of organelle organization	56/4415	153/16975	0.00240548	0.0497557	0.0441495	mc00522/mc00667/mc02254/mc02433/mc03142/mc03461/mc04304/mc04550/mc06254/mc06617/mc06746/mc07432/mc07675/mc08523/mc09231/mc09555/mc09961/mc10118/mc10305/mc12486/mc12729/mc12949/mc13019/mc14916/mc15031/mc15364/mc16012/mc16749/mc17698/mc17880/mc19281/mc20210/mc21075/mc21229/mc21798/mc22076/mc22303/mc22455/mc23617/mc24338/mc24962/mc28079/mc28821/mc29345/mc29730/mc30143/mc30592/mc31072/mc31906/mc34246…	56
BP	GO:0010225	response to UV-C	12/4415	21/16975	0.00242159	0.0497557	0.0441495	mc00912/mc03693/mc05765/mc09790/mc11200/mc11343/mc12612/mc14424/mc17610/mc18984/mc21943/mc35102	12
CC	GO:0005802	trans-Golgi network	152/4335	453/16891	9.05632e-05	0.0152808	0.0133372	mc00751/mc01033/mc01260/mc01427/mc02743/mc03615/mc03638/mc03896/mc04313/mc04585/mc04833/mc04978/mc05172/mc05388/mc05452/mc05506/mc05674/mc06110/mc06125/mc06160/mc06516/mc07138/mc07204/mc07439/mc07701/mc07903/mc08052/mc08851/mc09713/mc09737/mc10031/mc10034/mc10059/mc10460/mc10661/mc10755/mc11009/mc11513/mc11933/mc12429/mc12540/mc12551/mc12687/mc12766/mc13393/mc13443/mc13601/mc13810/mc13995/mc14015…	152
CC	GO:0005769	early endosome	47/4335	112/16891	0.000118466	0.0152808	0.0133372	mc02495/mc02729/mc02743/mc04978/mc05384/mc05514/mc05674/mc06110/mc06125/mc06516/mc07007/mc08052/mc08579/mc08835/mc08851/mc10034/mc13393/mc13591/mc13995/mc14015/mc14473/mc14716/mc15134/mc15820/mc17739/mc17824/mc19372/mc20014/mc20940/mc21153/mc22873/mc23094/mc23860/mc25278/mc26128/mc26625/mc27728/mc29557/mc30818/mc32591/mc32739/mc35763/mc35904/mc37035/mc38534/mc39263/mc40205	47
CC	GO:0010008	endosome membrane	60/4335	152/16891	0.000123036	0.0152808	0.0133372	mc01309/mc02322/mc02495/mc02729/mc04079/mc04430/mc04726/mc04936/mc04978/mc06016/mc06198/mc06237/mc06982/mc06984/mc07553/mc07831/mc07995/mc08052/mc08250/mc08579/mc08835/mc10031/mc11513/mc11933/mc12201/mc12540/mc12614/mc12687/mc12766/mc14130/mc14744/mc14748/mc15376/mc15418/mc17027/mc17450/mc17824/mc18221/mc19612/mc21152/mc21496/mc21878/mc21951/mc22033/mc22118/mc23882/mc27085/mc28447/mc28751/mc28783…	60
CC	GO:0030126	COPI vesicle coat	10/4335	13/16891	0.000159175	0.0152808	0.0133372	mc04897/mc07960/mc13555/mc23056/mc27690/mc29403/mc29473/mc30652/mc30730/mc39296	10
CC	GO:0030663	COPI-coated vesicle membrane	10/4335	13/16891	0.000159175	0.0152808	0.0133372	mc04897/mc07960/mc13555/mc23056/mc27690/mc29403/mc29473/mc30652/mc30730/mc39296	10
CC	GO:0010445	nuclear dicing body	8/4335	10/16891	0.000503156	0.0332499	0.0290207	mc04133/mc08190/mc15677/mc18235/mc19860/mc25749/mc33527/mc36356	8
CC	GO:0045111	intermediate filament cytoskeleton	8/4335	10/16891	0.000503156	0.0332499	0.0290207	mc02254/mc12729/mc17880/mc22076/mc24962/mc28283/mc31706/mc35962	8
CC	GO:0030135	coated vesicle	37/4335	88/16891	0.000574412	0.0332499	0.0290207	mc01309/mc02457/mc02809/mc03212/mc04286/mc04897/mc04929/mc05272/mc05384/mc05514/mc05611/mc07414/mc07960/mc07987/mc08545/mc08912/mc13555/mc15806/mc18489/mc20002/mc23056/mc24362/mc26910/mc27690/mc29403/mc29473/mc29730/mc29784/mc29988/mc30143/mc30652/mc30730/mc32278/mc33936/mc36668/mc37989/mc39296	37
CC	GO:0030137	COPI-coated vesicle	12/4335	19/16891	0.000623435	0.0332499	0.0290207	mc04897/mc07960/mc13555/mc23056/mc24362/mc27690/mc29403/mc29473/mc30652/mc30730/mc37989/mc39296	12
CC	GO:0010319	stromule	25/4335	54/16891	0.000825944	0.0396453	0.0346027	mc00399/mc00408/mc05364/mc05534/mc06876/mc11372/mc11780/mc14799/mc16018/mc16590/mc17186/mc17578/mc20215/mc26203/mc26640/mc28380/mc29246/mc29888/mc29956/mc30486/mc31599/mc32572/mc32815/mc34146/mc34160	25
CC	GO:0005875	microtubule associated complex	52/4335	137/16891	0.000987904	0.0431085	0.0376254	mc00792/mc01000/mc02255/mc05249/mc05638/mc07031/mc07045/mc10008/mc10373/mc10551/mc12639/mc12791/mc12979/mc13191/mc13896/mc14677/mc14686/mc15470/mc16031/mc16305/mc16461/mc16484/mc16686/mc18207/mc19563/mc20227/mc20500/mc20695/mc20935/mc21113/mc21974/mc22142/mc22350/mc22543/mc23428/mc23596/mc24963/mc26253/mc27809/mc28557/mc28791/mc29076/mc29494/mc30349/mc30767/mc31103/mc31398/mc32874/mc34858/mc35648…	52
MF	GO:0047262	polygalacturonate 4-alpha-galacturonosyltransferase activity	28/3840	44/14722	1.7759e-07	0.000129818	0.000120948	mc00524/mc01260/mc01297/mc02432/mc03134/mc08522/mc09225/mc12373/mc12429/mc18226/mc21698/mc21748/mc24339/mc26391/mc26393/mc26663/mc27755/mc28062/mc31917/mc32536/mc33021/mc33023/mc33878/mc33919/mc34249/mc36352/mc39229/mc40434	28
MF	GO:0003756	protein disulfide isomerase activity	24/3840	38/14722	1.65527e-06	0.000403335	0.000375776	mc01674/mc02249/mc03518/mc03896/mc04013/mc04566/mc05452/mc07684/mc08319/mc09613/mc12382/mc13060/mc17938/mc21703/mc22487/mc24951/mc25810/mc28899/mc29483/mc30740/mc30976/mc33461/mc34596/mc36022	24
MF	GO:0016864	intramolecular oxidoreductase activity, transposing S-S bonds	24/3840	38/14722	1.65527e-06	0.000403335	0.000375776	mc01674/mc02249/mc03518/mc03896/mc04013/mc04566/mc05452/mc07684/mc08319/mc09613/mc12382/mc13060/mc17938/mc21703/mc22487/mc24951/mc25810/mc28899/mc29483/mc30740/mc30976/mc33461/mc34596/mc36022	24
MF	GO:0003730	mRNA 3'-UTR binding	28/3840	50/14722	6.8109e-06	0.00124469	0.00115964	mc00476/mc00612/mc01041/mc02213/mc02283/mc03973/mc06181/mc06220/mc06625/mc08368/mc10792/mc13019/mc15024/mc15394/mc15430/mc15964/mc18558/mc18639/mc20176/mc22455/mc24918/mc27122/mc29613/mc30867/mc33672/mc34203/mc35192/mc35596	28
MF	GO:0034593	phosphatidylinositol bisphosphate phosphatase activity	21/3840	35/14722	2.33296e-05	0.00341079	0.00317774	mc01471/mc03790/mc03847/mc06982/mc09878/mc11243/mc14748/mc16043/mc18370/mc19036/mc20237/mc25157/mc27350/mc29060/mc29557/mc30333/mc30818/mc34811/mc36520/mc38310/mc39656	21
MF	GO:0031593	polyubiquitin modification-dependent protein binding	16/3840	24/14722	3.52877e-05	0.00429922	0.00400546	mc00163/mc00817/mc05326/mc05575/mc06796/mc13636/mc14880/mc23125/mc24511/mc28384/mc29446/mc30203/mc30696/mc31595/mc35058/mc40669	16
MF	GO:0052866	phosphatidylinositol phosphate phosphatase activity	23/3840	41/14722	4.33413e-05	0.00452608	0.00421682	mc01471/mc03790/mc03847/mc06982/mc09878/mc11243/mc14748/mc16043/mc18370/mc19036/mc20237/mc25157/mc27350/mc29060/mc29557/mc29586/mc30333/mc30818/mc30844/mc34811/mc36520/mc38310/mc39656	23
MF	GO:0000981	DNA-binding transcription factor activity, RNA polymerase II-specific	105/3840	288/14722	5.77109e-05	0.00527333	0.00491302	mc01118/mc02269/mc03074/mc03552/mc03646/mc03830/mc03991/mc04030/mc04304/mc04699/mc05001/mc05402/mc06050/mc06500/mc06735/mc07432/mc07802/mc08068/mc08305/mc08347/mc09647/mc09744/mc10614/mc11221/mc11399/mc11433/mc11617/mc11783/mc11894/mc12472/mc12711/mc12958/mc13022/mc13372/mc13442/mc13522/mc14096/mc14929/mc15146/mc15507/mc15558/mc16392/mc17060/mc17182/mc17360/mc17525/mc18173/mc18267/mc18399/mc18466…	105
MF	GO:0034485	phosphatidylinositol-3,4,5-trisphosphate 5-phosphatase activity	15/3840	23/14722	9.14489e-05	0.00668492	0.00622815	mc01471/mc03790/mc03847/mc09878/mc16043/mc18370/mc20237/mc25157/mc27350/mc29060/mc30333/mc34811/mc36520/mc38310/mc39656	15
MF	GO:0034594	phosphatidylinositol trisphosphate phosphatase activity	15/3840	23/14722	9.14489e-05	0.00668492	0.00622815	mc01471/mc03790/mc03847/mc09878/mc16043/mc18370/mc20237/mc25157/mc27350/mc29060/mc30333/mc34811/mc36520/mc38310/mc39656	15
MF	GO:0035091	phosphatidylinositol binding	47/3840	111/14722	0.00013775	0.00915414	0.00852866	mc00427/mc01472/mc01648/mc02609/mc03749/mc04057/mc04286/mc04430/mc04671/mc04685/mc04929/mc05272/mc05611/mc06198/mc06983/mc06984/mc07414/mc07553/mc07775/mc07789/mc07987/mc08284/mc08772/mc09847/mc09922/mc10715/mc11513/mc14744/mc14746/mc15418/mc15720/mc17450/mc19678/mc19889/mc24161/mc26418/mc28132/mc28385/mc28783/mc31112/mc31594/mc31823/mc33048/mc34120/mc34619/mc34809/mc38214	47
MF	GO:0033549	MAP kinase phosphatase activity	10/3840	13/14722	0.000184256	0.0112243	0.0104574	mc03693/mc06055/mc09790/mc11200/mc11910/mc14085/mc17049/mc18984/mc29293/mc30532	10
MF	GO:0005543	phospholipid binding	65/3840	168/14722	0.000215255	0.012104	0.0112769	mc00427/mc01472/mc01648/mc02609/mc03749/mc04057/mc04286/mc04430/mc04671/mc04685/mc04929/mc05241/mc05272/mc05611/mc05643/mc06198/mc06983/mc06984/mc07414/mc07553/mc07775/mc07789/mc07987/mc08284/mc08772/mc09847/mc09922/mc10715/mc11513/mc14744/mc14746/mc15418/mc15720/mc15730/mc15781/mc17450/mc17718/mc19678/mc19889/mc19899/mc19975/mc23509/mc24161/mc26418/mc26574/mc27673/mc28132/mc28342/mc28385/mc28783…	65
MF	GO:0004725	protein tyrosine phosphatase activity	14/3840	22/14722	0.000232165	0.0121223	0.011294	mc03032/mc03693/mc06055/mc09110/mc09790/mc11200/mc11910/mc14085/mc17049/mc18984/mc19590/mc29060/mc30333/mc35442	14
MF	GO:0016860	intramolecular oxidoreductase activity	36/3840	81/14722	0.00025929	0.0126361	0.0117727	mc01543/mc01553/mc01674/mc02249/mc03518/mc03648/mc03894/mc03896/mc04013/mc04566/mc05450/mc05452/mc06928/mc07684/mc08319/mc09613/mc09749/mc12382/mc13060/mc14775/mc17938/mc21703/mc22487/mc24951/mc25810/mc27474/mc28899/mc29483/mc30740/mc30976/mc33461/mc34596/mc34730/mc34739/mc36022/mc39790	36
MF	GO:0048487	beta-tubulin binding	10/3840	14/14722	0.000493478	0.0225458	0.0210053	mc02254/mc04682/mc07786/mc10118/mc12729/mc17880/mc21229/mc22076/mc24962/mc35962	10
MF	GO:0003774	motor activity	47/3840	117/14722	0.000585261	0.0251081	0.0233926	mc01000/mc02255/mc02476/mc05249/mc05638/mc08565/mc10008/mc10551/mc12639/mc12700/mc12791/mc12979/mc13896/mc15470/mc16031/mc16461/mc16484/mc18207/mc19563/mc20227/mc20695/mc20935/mc21113/mc21974/mc22043/mc22142/mc22350/mc23428/mc23596/mc23694/mc24963/mc25171/mc26253/mc27809/mc28222/mc28557/mc28791/mc31103/mc31398/mc31761/mc32874/mc34858/mc35648/mc36337/mc38740/mc38897/mc40087	47
MF	GO:0034595	phosphatidylinositol phosphate 5-phosphatase activity	17/3840	31/14722	0.000618258	0.0251081	0.0233926	mc01471/mc03790/mc03847/mc09878/mc16043/mc18370/mc20237/mc25157/mc27350/mc29060/mc29557/mc30333/mc30818/mc34811/mc36520/mc38310/mc39656	17
MF	GO:0052745	inositol phosphate phosphatase activity	10/3840	15/14722	0.00113384	0.0430965	0.0401519	mc01471/mc10636/mc18370/mc19466/mc19765/mc27350/mc34811/mc36520/mc36831/mc39656	10
MF	GO:0003779	actin binding	50/3840	130/14722	0.00126754	0.0430965	0.0401519	mc00430/mc00522/mc00667/mc01396/mc02009/mc02433/mc02476/mc06754/mc06983/mc08523/mc08565/mc10305/mc10551/mc11999/mc12486/mc12700/mc14746/mc14908/mc15953/mc16484/mc16749/mc16959/mc17698/mc20163/mc21798/mc22043/mc23694/mc24338/mc24706/mc25171/mc25339/mc26028/mc26819/mc27056/mc28222/mc29034/mc30320/mc31761/mc32108/mc32381/mc33226/mc34018/mc34114/mc34246/mc35273/mc35734/mc38740/mc40087/mc40284/mc40435	50
MF	GO:0001216	DNA-binding transcription activator activity	38/3840	93/14722	0.00129702	0.0430965	0.0401519	mc01118/mc02269/mc03830/mc04030/mc04699/mc05402/mc06050/mc07802/mc08305/mc11221/mc12711/mc13442/mc14096/mc15507/mc16392/mc18173/mc18399/mc19013/mc19238/mc20590/mc20884/mc22056/mc22931/mc23615/mc23623/mc23902/mc25898/mc27149/mc29628/mc30885/mc33367/mc33744/mc36297/mc36545/mc37333/mc38484/mc38860/mc38867	38
MF	GO:0001228	DNA-binding transcription activator activity, RNA polymerase II-specific	38/3840	93/14722	0.00129702	0.0430965	0.0401519	mc01118/mc02269/mc03830/mc04030/mc04699/mc05402/mc06050/mc07802/mc08305/mc11221/mc12711/mc13442/mc14096/mc15507/mc16392/mc18173/mc18399/mc19013/mc19238/mc20590/mc20884/mc22056/mc22931/mc23615/mc23623/mc23902/mc25898/mc27149/mc29628/mc30885/mc33367/mc33744/mc36297/mc36545/mc37333/mc38484/mc38860/mc38867	38
MF	GO:0004576	oligosaccharyl transferase activity	8/3840	11/14722	0.0016013	0.0487729	0.0454403	mc01858/mc06594/mc12459/mc15053/mc21775/mc24240/mc34375/mc38125	8
MF	GO:0004579	dolichyl-diphosphooligosaccharide-protein glycotransferase activity	8/3840	11/14722	0.0016013	0.0487729	0.0454403	mc01858/mc06594/mc12459/mc15053/mc21775/mc24240/mc34375/mc38125	8
