# Supplementary material for: Chromosomal-level genome assembly of Melastoma candidum provides insights into trichome evolution
Source: Front Plant Sci. 2023 Jan 27;14:1126319. doi: 10.3389/fpls.2023.1126319 (PMC9911893; doi:10.3389/fpls.2023.1126319)
Supplement: Supplementary file 5 [file Table_4.xlsx]

## Sheet: Supplementary Excel file 4. GO 
Supplementary Excel file 4 GO enrichment analysis of retained genes after WGD r
ONTOLOGY	ID	Description	GeneRatio	BgRatio	pvalue	p.adjust	qvalue	geneID	Count
BP	GO:0048585	negative regulation of response to stimulus	109/1994	489/16975	1.71469e-11	4.37247e-08	3.46007e-08	mc00488/mc01953/mc02368/mc02774/mc04020/mc04394/mc04714/mc05049/mc05412/mc05627/mc05678/mc06226/mc06682/mc06684/mc06908/mc07115/mc07508/mc07817/mc07927/mc08114/mc08314/mc08332/mc08874/mc09107/mc09206/mc09211/mc09790/mc10530/mc10681/mc11200/mc11359/mc12296/mc12354/mc12444/mc13063/mc13198/mc13866/mc14007/mc14464/mc14465/mc14594/mc14754/mc14977/mc14978/mc15409/mc16072/mc16096/mc16345/mc16663/mc17592…	109
BP	GO:1901348	positive regulation of secondary cell wall biogenesis	15/1994	20/16975	9.28105e-11	7.88889e-08	6.24273e-08	mc01096/mc01618/mc03413/mc04705/mc07808/mc10698/mc11783/mc17182/mc19696/mc23570/mc29621/mc30878/mc33716/mc34632/mc38931	15
BP	GO:1903340	positive regulation of cell wall organization or biogenesis	15/1994	20/16975	9.28105e-11	7.88889e-08	6.24273e-08	mc01096/mc01618/mc03413/mc04705/mc07808/mc10698/mc11783/mc17182/mc19696/mc23570/mc29621/mc30878/mc33716/mc34632/mc38931	15
BP	GO:1903338	regulation of cell wall organization or biogenesis	23/1994	49/16975	9.87267e-10	6.29383e-07	4.9805e-07	mc01096/mc01618/mc03413/mc04705/mc05249/mc05638/mc07808/mc09243/mc10698/mc10724/mc11783/mc17182/mc19696/mc23570/mc23596/mc28639/mc29621/mc30234/mc30878/mc33716/mc34632/mc38897/mc38931	23
BP	GO:0048759	xylem vessel member cell differentiation	12/1994	16/16975	7.73208e-09	3.26666e-06	2.58501e-06	mc01096/mc01618/mc04705/mc07808/mc10698/mc19696/mc23570/mc29621/mc30878/mc33716/mc34632/mc38931	12
BP	GO:0032270	positive regulation of cellular protein metabolic process	73/1994	316/16975	7.97588e-09	3.26666e-06	2.58501e-06	mc00155/mc00280/mc00428/mc01394/mc04089/mc04599/mc06516/mc06716/mc06746/mc07720/mc08235/mc09308/mc09365/mc09850/mc10718/mc10952/mc12487/mc12575/mc12949/mc13143/mc13233/mc13585/mc13636/mc13665/mc14245/mc14514/mc14553/mc14916/mc14953/mc15134/mc16319/mc16345/mc16349/mc18029/mc18788/mc19034/mc19531/mc19673/mc20064/mc20540/mc21473/mc22303/mc22623/mc22698/mc23090/mc23125/mc23158/mc23591/mc23887/mc24590…	73
BP	GO:0006817	phosphate ion transport	20/1994	42/16975	8.9673e-09	3.26666e-06	2.58501e-06	mc01005/mc01691/mc05388/mc05506/mc06133/mc07099/mc10486/mc12165/mc13142/mc13985/mc14617/mc16566/mc16776/mc17497/mc22624/mc24592/mc27838/mc34570/mc39157/mc39934	20
BP	GO:0010089	xylem development	30/1994	87/16975	2.33964e-08	7.45761e-06	5.90144e-06	mc01096/mc01618/mc01727/mc04705/mc07808/mc09605/mc10698/mc10724/mc12236/mc15889/mc17304/mc19696/mc20101/mc21529/mc21949/mc23225/mc23570/mc23596/mc25952/mc26557/mc26945/mc27084/mc29621/mc30878/mc33297/mc33716/mc34632/mc34897/mc38897/mc38931	30
BP	GO:0051247	positive regulation of protein metabolic process	73/1994	326/16975	3.17272e-08	8.98938e-06	7.11358e-06	mc00155/mc00280/mc00428/mc01394/mc04089/mc04599/mc06516/mc06716/mc06746/mc07720/mc08235/mc09308/mc09365/mc09850/mc10718/mc10952/mc12487/mc12575/mc12949/mc13143/mc13233/mc13585/mc13636/mc13665/mc14245/mc14514/mc14553/mc14916/mc14953/mc15134/mc16319/mc16345/mc16349/mc18029/mc18788/mc19034/mc19531/mc19673/mc20064/mc20540/mc21473/mc22303/mc22623/mc22698/mc23090/mc23125/mc23158/mc23591/mc23887/mc24590…	73
BP	GO:0000165	MAPK cascade	31/1994	94/16975	4.50804e-08	1.14955e-05	9.09674e-06	mc00375/mc00428/mc00586/mc00774/mc01394/mc01809/mc05445/mc09107/mc09365/mc09790/mc11200/mc11397/mc12064/mc12487/mc16349/mc17553/mc18029/mc18984/mc20540/mc26263/mc27436/mc28462/mc29293/mc30532/mc32884/mc34016/mc34119/mc34182/mc35171/mc36140/mc39744	31
BP	GO:0046777	protein autophosphorylation	68/1994	300/16975	5.67846e-08	1.31637e-05	1.04169e-05	mc00411/mc00428/mc00732/mc00835/mc01394/mc01780/mc01847/mc04714/mc05710/mc06036/mc06266/mc06393/mc06602/mc06684/mc06865/mc07817/mc09206/mc09365/mc09850/mc10718/mc11974/mc12069/mc12397/mc14358/mc14465/mc14814/mc14977/mc15354/mc15674/mc16319/mc16349/mc17911/mc18029/mc19034/mc19673/mc19854/mc19911/mc20147/mc20540/mc20659/mc21717/mc22494/mc23591/mc23942/mc24650/mc25682/mc25761/mc26005/mc28462/mc29999…	68
BP	GO:0007010	cytoskeleton organization	92/1994	452/16975	7.30461e-08	1.55223e-05	1.22833e-05	mc00522/mc00667/mc00732/mc00794/mc01780/mc01816/mc02059/mc02254/mc02433/mc03429/mc03877/mc04599/mc05249/mc05435/mc05638/mc06516/mc06754/mc07240/mc07720/mc07787/mc08523/mc09178/mc10616/mc10724/mc10791/mc10888/mc11386/mc11765/mc12088/mc12178/mc12351/mc12440/mc12700/mc12729/mc12949/mc12979/mc13559/mc14245/mc14908/mc15134/mc15693/mc15779/mc16319/mc16764/mc16854/mc17203/mc17565/mc19865/mc21547/mc21757…	92
BP	GO:0007015	actin filament organization	40/1994	142/16975	7.97866e-08	1.56504e-05	1.23847e-05	mc00522/mc00667/mc02433/mc06516/mc06754/mc07240/mc08523/mc10616/mc10791/mc10888/mc12088/mc12440/mc12700/mc14245/mc14908/mc15134/mc15693/mc15779/mc16854/mc19865/mc21547/mc21757/mc22043/mc23694/mc23813/mc24338/mc25020/mc25704/mc25806/mc27146/mc27477/mc32644/mc32941/mc33468/mc33579/mc34246/mc35273/mc38740/mc39050/mc40435	40
BP	GO:0031401	positive regulation of protein modification process	51/1994	203/16975	8.70589e-08	1.58572e-05	1.25483e-05	mc00155/mc00280/mc00428/mc01394/mc04599/mc06516/mc06716/mc06746/mc07720/mc09365/mc09850/mc10718/mc12487/mc12575/mc13143/mc13233/mc13636/mc14245/mc14514/mc14553/mc14916/mc14953/mc15134/mc16319/mc16345/mc16349/mc18029/mc19034/mc19673/mc20064/mc20540/mc22623/mc22698/mc23125/mc23591/mc24590/mc25920/mc26154/mc26263/mc26884/mc28462/mc28924/mc32755/mc32884/mc33338/mc34016/mc34119/mc36140/mc36150/mc36209…	51
BP	GO:0032535	regulation of cellular component size	42/1994	157/16975	1.86206e-07	3.16549e-05	2.50495e-05	mc00254/mc00522/mc00667/mc01223/mc01563/mc02221/mc02433/mc02722/mc06516/mc06754/mc07240/mc08523/mc10888/mc12078/mc12088/mc12700/mc13152/mc14245/mc14908/mc15134/mc16854/mc16870/mc21547/mc22043/mc22124/mc23813/mc24122/mc24338/mc24578/mc24930/mc25020/mc27146/mc27451/mc27477/mc32644/mc33841/mc34246/mc34707/mc35273/mc38253/mc39764/mc40435	42
BP	GO:0080022	primary root development	21/1994	53/16975	1.99477e-07	3.17916e-05	2.51577e-05	mc00100/mc01110/mc04305/mc04394/mc07508/mc13296/mc15937/mc15993/mc20141/mc20192/mc22775/mc24350/mc24415/mc24464/mc25998/mc26061/mc33200/mc33256/mc33732/mc34643/mc38042	21
BP	GO:0080036	regulation of cytokinin-activated signaling pathway	14/1994	26/16975	2.22205e-07	3.27063e-05	2.58816e-05	mc04394/mc05627/mc07508/mc12354/mc15937/mc20141/mc21685/mc24415/mc25998/mc29681/mc30219/mc33039/mc33256/mc38042	14
BP	GO:0072348	sulfur compound transport	19/1994	45/16975	2.30868e-07	3.27063e-05	2.58816e-05	mc01005/mc01464/mc01475/mc01652/mc01660/mc01691/mc08344/mc10488/mc11998/mc16564/mc22734/mc25260/mc27343/mc27837/mc34570/mc34808/mc34817/mc39648/mc40180	19
BP	GO:2000652	regulation of secondary cell wall biogenesis	15/1994	30/16975	2.93083e-07	3.78939e-05	2.99867e-05	mc01096/mc01618/mc03413/mc04705/mc07808/mc10698/mc11783/mc17182/mc19696/mc23570/mc29621/mc30878/mc33716/mc34632/mc38931	15
BP	GO:0042594	response to starvation	62/1994	276/16975	3.02484e-07	3.78939e-05	2.99867e-05	mc00360/mc00602/mc01464/mc01475/mc01652/mc01660/mc02254/mc04394/mc05388/mc05506/mc05817/mc07508/mc07617/mc08105/mc08926/mc09129/mc09440/mc09985/mc10718/mc11876/mc12165/mc12348/mc12700/mc12729/mc14314/mc15078/mc16318/mc16776/mc17077/mc17497/mc17911/mc18077/mc19441/mc19673/mc20512/mc20659/mc21675/mc22043/mc22076/mc23423/mc23591/mc24415/mc24962/mc26418/mc27146/mc27218/mc28014/mc28854/mc29092/mc29309…	62
BP	GO:1905177	tracheary element differentiation	12/1994	20/16975	3.39651e-07	3.78939e-05	2.99867e-05	mc01096/mc01618/mc04705/mc07808/mc10698/mc19696/mc23570/mc29621/mc30878/mc33716/mc34632/mc38931	12
BP	GO:0010648	negative regulation of cell communication	63/1994	283/16975	3.41789e-07	3.78939e-05	2.99867e-05	mc00488/mc01953/mc02368/mc04020/mc04394/mc05412/mc05627/mc05678/mc06682/mc06684/mc07508/mc08314/mc09107/mc09206/mc09211/mc09790/mc11200/mc11359/mc12354/mc13063/mc13866/mc14464/mc14465/mc14977/mc14978/mc16663/mc17592/mc18984/mc20064/mc21685/mc22491/mc23338/mc23961/mc24415/mc25164/mc25278/mc25920/mc27005/mc27055/mc27193/mc27961/mc28146/mc29293/mc29361/mc29681/mc29834/mc30041/mc30219/mc30469/mc30532…	63
BP	GO:0023057	negative regulation of signaling	63/1994	283/16975	3.41789e-07	3.78939e-05	2.99867e-05	mc00488/mc01953/mc02368/mc04020/mc04394/mc05412/mc05627/mc05678/mc06682/mc06684/mc07508/mc08314/mc09107/mc09206/mc09211/mc09790/mc11200/mc11359/mc12354/mc13063/mc13866/mc14464/mc14465/mc14977/mc14978/mc16663/mc17592/mc18984/mc20064/mc21685/mc22491/mc23338/mc23961/mc24415/mc25164/mc25278/mc25920/mc27005/mc27055/mc27193/mc27961/mc28146/mc29293/mc29361/mc29681/mc29834/mc30041/mc30219/mc30469/mc30532…	63
BP	GO:0030036	actin cytoskeleton organization	47/1994	190/16975	4.48811e-07	4.76862e-05	3.77356e-05	mc00522/mc00667/mc00732/mc01780/mc02254/mc02433/mc06516/mc06754/mc07240/mc08523/mc10616/mc10791/mc10888/mc12088/mc12440/mc12700/mc12729/mc14245/mc14908/mc15134/mc15693/mc15779/mc16854/mc19865/mc21547/mc21757/mc22043/mc22076/mc23694/mc23813/mc24338/mc24962/mc25020/mc25704/mc25806/mc27146/mc27477/mc32644/mc32941/mc33468/mc33579/mc34246/mc34954/mc35273/mc38740/mc39050/mc40435	47
BP	GO:0009968	negative regulation of signal transduction	61/1994	276/16975	6.77297e-07	6.90843e-05	5.46686e-05	mc00488/mc01953/mc02368/mc04020/mc04394/mc05412/mc05627/mc05678/mc06682/mc06684/mc07508/mc08314/mc09107/mc09206/mc09211/mc09790/mc11200/mc11359/mc12354/mc13063/mc13866/mc14464/mc14465/mc14977/mc14978/mc16663/mc17592/mc18984/mc20064/mc21685/mc22491/mc23338/mc23961/mc24415/mc25164/mc25278/mc25920/mc27005/mc27055/mc27193/mc27961/mc29293/mc29361/mc29681/mc29834/mc30041/mc30219/mc30469/mc30532/mc30612…	61
BP	GO:0097435	supramolecular fiber organization	58/1994	260/16975	9.18595e-07	9.0093e-05	7.12934e-05	mc00522/mc00667/mc00732/mc00794/mc01780/mc01816/mc02433/mc05249/mc05638/mc06516/mc06754/mc07240/mc08523/mc10616/mc10724/mc10791/mc10888/mc12088/mc12351/mc12440/mc12700/mc14245/mc14908/mc15134/mc15693/mc15779/mc16319/mc16854/mc19865/mc21547/mc21757/mc22043/mc23596/mc23694/mc23813/mc24338/mc25020/mc25704/mc25806/mc26414/mc27146/mc27477/mc30234/mc32644/mc32941/mc33043/mc33468/mc33579/mc34246/mc34417…	58
BP	GO:0051865	protein autoubiquitination	22/1994	62/16975	9.75081e-07	9.2091e-05	7.28745e-05	mc02061/mc03332/mc04004/mc05999/mc06422/mc08330/mc12555/mc14149/mc15217/mc16014/mc16345/mc22345/mc24041/mc25268/mc26177/mc29711/mc30172/mc31433/mc32787/mc33167/mc36150/mc38339	22
BP	GO:0090066	regulation of anatomical structure size	42/1994	167/16975	1.13081e-06	0.000102984	8.14946e-05	mc00254/mc00522/mc00667/mc01223/mc01563/mc02221/mc02433/mc02722/mc06516/mc06754/mc07240/mc08523/mc10888/mc12078/mc12088/mc12700/mc13152/mc14245/mc14908/mc15134/mc16854/mc16870/mc21547/mc22043/mc22124/mc23813/mc24122/mc24338/mc24578/mc24930/mc25020/mc27146/mc27451/mc27477/mc32644/mc33841/mc34246/mc34707/mc35273/mc38253/mc39764/mc40435	42
BP	GO:1902531	regulation of intracellular signal transduction	44/1994	179/16975	1.24242e-06	0.000109247	8.64504e-05	mc00428/mc00488/mc01394/mc04020/mc06684/mc07617/mc08314/mc09107/mc09206/mc09365/mc09790/mc11200/mc12296/mc12487/mc12575/mc13636/mc14465/mc14977/mc16349/mc18029/mc18984/mc20064/mc20540/mc23125/mc25278/mc25920/mc26154/mc26263/mc26884/mc28462/mc28854/mc29293/mc30532/mc30612/mc32571/mc32755/mc32884/mc33338/mc34016/mc34119/mc34212/mc35217/mc36140/mc40205	44
BP	GO:2000762	regulation of phenylpropanoid metabolic process	15/1994	33/16975	1.38821e-06	0.000117998	9.33752e-05	mc03388/mc05627/mc05902/mc06500/mc07927/mc09485/mc11816/mc15146/mc16909/mc17151/mc27395/mc29681/mc30219/mc30762/mc39702	15
BP	GO:0031667	response to nutrient levels	74/1994	365/16975	1.59375e-06	0.000129192	0.000102234	mc00104/mc00360/mc00428/mc00602/mc01394/mc01464/mc01475/mc01652/mc01660/mc02254/mc04394/mc05388/mc05506/mc05817/mc07508/mc07617/mc08105/mc08926/mc09129/mc09440/mc09985/mc10718/mc11876/mc12165/mc12247/mc12348/mc12700/mc12729/mc13288/mc14314/mc15078/mc16318/mc16704/mc16776/mc17077/mc17497/mc17911/mc18077/mc19441/mc19673/mc20512/mc20659/mc21675/mc22043/mc22076/mc22759/mc23423/mc23591/mc24415/mc24962…	74
BP	GO:0044089	positive regulation of cellular component biogenesis	35/1994	130/16975	1.62123e-06	0.000129192	0.000102234	mc00522/mc00667/mc01096/mc01618/mc02254/mc02433/mc03332/mc03413/mc04705/mc07808/mc08523/mc09308/mc10698/mc11783/mc12729/mc17182/mc19696/mc21547/mc22076/mc23570/mc24338/mc24962/mc25020/mc28549/mc29621/mc30878/mc31388/mc31433/mc32644/mc33716/mc34246/mc34632/mc35273/mc38931/mc40435	35
BP	GO:0035435	phosphate ion transmembrane transport	13/1994	26/16975	1.84213e-06	0.000142346	0.000112643	mc01005/mc01691/mc06133/mc07099/mc12165/mc13142/mc13985/mc14617/mc16776/mc22624/mc24592/mc34570/mc39934	13
BP	GO:1900034	regulation of cellular response to heat	9/1994	13/16975	1.92167e-06	0.000144125	0.000114051	mc04188/mc10593/mc15825/mc19804/mc20022/mc25387/mc25885/mc33388/mc39063	9
BP	GO:0001934	positive regulation of protein phosphorylation	34/1994	127/16975	2.60726e-06	0.000189958	0.000150319	mc00155/mc00280/mc00428/mc01394/mc04599/mc06716/mc07720/mc09365/mc09850/mc10718/mc12487/mc13143/mc13233/mc14514/mc14953/mc16319/mc16349/mc18029/mc19034/mc19673/mc20540/mc22623/mc22698/mc23591/mc24590/mc26263/mc28462/mc28924/mc32884/mc34016/mc34119/mc36140/mc36209/mc38900	34
BP	GO:0006890	retrograde vesicle-mediated transport, Golgi to endoplasmic reticulum	20/1994	56/16975	2.68206e-06	0.000189979	0.000150337	mc02059/mc03732/mc04326/mc04897/mc05249/mc05638/mc07960/mc09819/mc11220/mc12979/mc13563/mc19007/mc22350/mc23066/mc24362/mc24762/mc26841/mc29473/mc30234/mc30730	20
BP	GO:2000243	positive regulation of reproductive process	32/1994	118/16975	3.77341e-06	0.000256734	0.000203161	mc04101/mc05378/mc05523/mc08225/mc09047/mc09231/mc11473/mc12340/mc12511/mc13873/mc13973/mc14652/mc16318/mc16583/mc17481/mc18077/mc20512/mc21665/mc21827/mc22494/mc23415/mc24650/mc26224/mc26439/mc27062/mc27854/mc29370/mc30627/mc32103/mc33076/mc39141/mc40278	32
BP	GO:0008154	actin polymerization or depolymerization	29/1994	102/16975	3.82584e-06	0.000256734	0.000203161	mc00522/mc00667/mc02433/mc06516/mc06754/mc07240/mc08523/mc10888/mc12088/mc12700/mc14245/mc14908/mc15134/mc15693/mc16854/mc19865/mc21547/mc22043/mc23813/mc24338/mc25020/mc25704/mc27146/mc27477/mc32644/mc33579/mc34246/mc35273/mc40435	29
BP	GO:0030029	actin filament-based process	49/1994	217/16975	4.38043e-06	0.000286413	0.000226648	mc00522/mc00667/mc00732/mc01780/mc02254/mc02433/mc06211/mc06516/mc06754/mc06939/mc07240/mc08523/mc10616/mc10791/mc10888/mc12088/mc12440/mc12700/mc12729/mc14245/mc14908/mc15134/mc15693/mc15779/mc16854/mc19865/mc21547/mc21757/mc22043/mc22076/mc23694/mc23813/mc24338/mc24962/mc25020/mc25704/mc25806/mc27146/mc27477/mc32644/mc32941/mc33468/mc33579/mc34246/mc34954/mc35273/mc38740/mc39050/mc40435	49
BP	GO:0043405	regulation of MAP kinase activity	16/1994	40/16975	4.87508e-06	0.000310787	0.000245935	mc00428/mc01394/mc09107/mc09365/mc09790/mc11200/mc16349/mc18029/mc18984/mc20540/mc28462/mc29293/mc30532/mc34016/mc34119/mc36140	16
BP	GO:0030833	regulation of actin filament polymerization	25/1994	83/16975	5.69932e-06	0.000353393	0.000279651	mc00522/mc00667/mc02433/mc06516/mc06754/mc07240/mc08523/mc10888/mc12088/mc12700/mc14245/mc14908/mc15134/mc16854/mc21547/mc22043/mc23813/mc24338/mc25020/mc27146/mc27477/mc32644/mc34246/mc35273/mc40435	25
BP	GO:0001932	regulation of protein phosphorylation	45/1994	195/16975	5.82059e-06	0.000353393	0.000279651	mc00155/mc00280/mc00428/mc01394/mc04599/mc06716/mc07720/mc09107/mc09365/mc09790/mc09850/mc10718/mc10880/mc11200/mc12487/mc13143/mc13233/mc14514/mc14657/mc14953/mc16319/mc16349/mc18029/mc18984/mc19034/mc19673/mc20064/mc20540/mc22623/mc22698/mc23591/mc24590/mc25920/mc26263/mc28462/mc28924/mc29293/mc30532/mc32884/mc33338/mc34016/mc34119/mc36140/mc36209/mc38900	45
BP	GO:0010562	positive regulation of phosphorus metabolic process	34/1994	132/16975	6.57968e-06	0.000372849	0.000295047	mc00155/mc00280/mc00428/mc01394/mc04599/mc06716/mc07720/mc09365/mc09850/mc10718/mc12487/mc13143/mc13233/mc14514/mc14953/mc16319/mc16349/mc18029/mc19034/mc19673/mc20540/mc22623/mc22698/mc23591/mc24590/mc26263/mc28462/mc28924/mc32884/mc34016/mc34119/mc36140/mc36209/mc38900	34
BP	GO:0042327	positive regulation of phosphorylation	34/1994	132/16975	6.57968e-06	0.000372849	0.000295047	mc00155/mc00280/mc00428/mc01394/mc04599/mc06716/mc07720/mc09365/mc09850/mc10718/mc12487/mc13143/mc13233/mc14514/mc14953/mc16319/mc16349/mc18029/mc19034/mc19673/mc20540/mc22623/mc22698/mc23591/mc24590/mc26263/mc28462/mc28924/mc32884/mc34016/mc34119/mc36140/mc36209/mc38900	34
BP	GO:0045937	positive regulation of phosphate metabolic process	34/1994	132/16975	6.57968e-06	0.000372849	0.000295047	mc00155/mc00280/mc00428/mc01394/mc04599/mc06716/mc07720/mc09365/mc09850/mc10718/mc12487/mc13143/mc13233/mc14514/mc14953/mc16319/mc16349/mc18029/mc19034/mc19673/mc20540/mc22623/mc22698/mc23591/mc24590/mc26263/mc28462/mc28924/mc32884/mc34016/mc34119/mc36140/mc36209/mc38900	34
BP	GO:0045859	regulation of protein kinase activity	39/1994	162/16975	8.33219e-06	0.000461893	0.000365511	mc00155/mc00280/mc00428/mc01394/mc04599/mc07720/mc09107/mc09365/mc09790/mc09850/mc10718/mc10880/mc11200/mc13143/mc13233/mc14657/mc16319/mc16349/mc18029/mc18984/mc19034/mc19673/mc20064/mc20540/mc22623/mc22698/mc23591/mc24590/mc25920/mc28462/mc28924/mc29293/mc30532/mc33338/mc34016/mc34119/mc36140/mc36209/mc38900	39
BP	GO:0032271	regulation of protein polymerization	25/1994	85/16975	9.09616e-06	0.000493515	0.000390534	mc00522/mc00667/mc02433/mc06516/mc06754/mc07240/mc08523/mc10888/mc12088/mc12700/mc14245/mc14908/mc15134/mc16854/mc21547/mc22043/mc23813/mc24338/mc25020/mc27146/mc27477/mc32644/mc34246/mc35273/mc40435	25
BP	GO:0051240	positive regulation of multicellular organismal process	54/1994	254/16975	9.69064e-06	0.000514815	0.000407389	mc01953/mc02061/mc02254/mc03323/mc05378/mc05523/mc05999/mc06217/mc06422/mc06923/mc09047/mc09294/mc10530/mc11473/mc12078/mc12511/mc12729/mc13063/mc13586/mc13873/mc13970/mc13973/mc14149/mc14652/mc14657/mc15217/mc16583/mc16708/mc16870/mc17481/mc19535/mc21468/mc21827/mc22076/mc22345/mc22491/mc22494/mc23091/mc23415/mc24650/mc24962/mc26224/mc26865/mc27062/mc27451/mc27663/mc27789/mc27854/mc30469/mc31417…	54
BP	GO:0009832	plant-type cell wall biogenesis	55/1994	261/16975	1.05594e-05	0.00054952	0.000434852	mc01033/mc01096/mc01618/mc02059/mc02191/mc03323/mc03413/mc03525/mc03815/mc03877/mc04705/mc05435/mc06713/mc07808/mc09294/mc09626/mc10698/mc10724/mc11329/mc11386/mc11654/mc11783/mc12088/mc12377/mc12515/mc12979/mc14511/mc16854/mc17182/mc17322/mc17565/mc19174/mc19696/mc21313/mc21701/mc21830/mc22162/mc22350/mc23570/mc23596/mc24762/mc26222/mc26391/mc27477/mc29621/mc30878/mc31417/mc32835/mc33021/mc33716…	55
BP	GO:0043408	regulation of MAPK cascade	19/1994	56/16975	1.12177e-05	0.000572104	0.000452724	mc00428/mc01394/mc09107/mc09365/mc09790/mc11200/mc12487/mc16349/mc18029/mc18984/mc20540/mc26263/mc28462/mc29293/mc30532/mc32884/mc34016/mc34119/mc36140	19
BP	GO:0030097	hemopoiesis	17/1994	47/16975	1.22799e-05	0.000613995	0.000485873	mc02605/mc03749/mc04004/mc08330/mc09847/mc11239/mc12555/mc19535/mc20064/mc21468/mc24212/mc25268/mc25920/mc26177/mc32787/mc33338/mc38159	17
BP	GO:0008272	sulfate transport	12/1994	26/16975	1.32019e-05	0.000647402	0.000512309	mc01005/mc01464/mc01475/mc01652/mc01660/mc01691/mc11998/mc27343/mc34570/mc34808/mc34817/mc39648	12
BP	GO:0045862	positive regulation of proteolysis	25/1994	87/16975	1.42415e-05	0.000672668	0.000532303	mc04089/mc08235/mc09308/mc10952/mc12949/mc13585/mc13636/mc16345/mc18788/mc20064/mc22303/mc23090/mc23125/mc23887/mc24790/mc25920/mc26864/mc26884/mc28549/mc31388/mc33338/mc36150/mc38501/mc40266/mc40274	25
BP	GO:0007568	aging	61/1994	302/16975	1.44096e-05	0.000672668	0.000532303	mc00476/mc00612/mc01577/mc01953/mc02061/mc04729/mc05999/mc06217/mc06422/mc06716/mc06923/mc07184/mc07835/mc09440/mc09846/mc10658/mc10681/mc11235/mc11876/mc12015/mc12064/mc12296/mc12348/mc12551/mc13063/mc14149/mc14514/mc14953/mc14963/mc15217/mc15704/mc15874/mc17077/mc19029/mc19716/mc19876/mc20064/mc20077/mc21867/mc22345/mc22491/mc23510/mc25727/mc25920/mc26418/mc27436/mc29601/mc30852/mc32571/mc32793…	61
BP	GO:0042325	regulation of phosphorylation	48/1994	220/16975	1.45085e-05	0.000672668	0.000532303	mc00155/mc00280/mc00428/mc01394/mc04599/mc06716/mc07720/mc09107/mc09365/mc09790/mc09850/mc10718/mc10880/mc11200/mc12487/mc12575/mc13143/mc13233/mc14514/mc14657/mc14953/mc16319/mc16349/mc18029/mc18984/mc19034/mc19673/mc20064/mc20540/mc22623/mc22698/mc23591/mc24590/mc25920/mc26154/mc26263/mc28462/mc28924/mc29293/mc30532/mc32755/mc32884/mc33338/mc34016/mc34119/mc36140/mc36209/mc38900	48
BP	GO:0006898	receptor-mediated endocytosis	20/1994	62/16975	1.56602e-05	0.000713098	0.000564296	mc01981/mc02682/mc05384/mc05514/mc10034/mc13025/mc15820/mc16084/mc17490/mc20014/mc21153/mc24158/mc24681/mc25868/mc26522/mc28146/mc33400/mc37035/mc38221/mc40070	20
BP	GO:0030041	actin filament polymerization	25/1994	88/16975	1.76978e-05	0.000778093	0.000615729	mc00522/mc00667/mc02433/mc06516/mc06754/mc07240/mc08523/mc10888/mc12088/mc12700/mc14245/mc14908/mc15134/mc16854/mc21547/mc22043/mc23813/mc24338/mc25020/mc27146/mc27477/mc32644/mc34246/mc35273/mc40435	25
BP	GO:0071470	cellular response to osmotic stress	25/1994	88/16975	1.76978e-05	0.000778093	0.000615729	mc01475/mc01652/mc01975/mc04728/mc05049/mc06354/mc06734/mc07218/mc07833/mc08114/mc13031/mc13665/mc14069/mc14930/mc16956/mc19159/mc21328/mc22466/mc23158/mc26905/mc27350/mc29022/mc29603/mc34808/mc39656	25
BP	GO:0071215	cellular response to abscisic acid stimulus	80/1994	430/16975	1.83035e-05	0.000787657	0.000623298	mc00473/mc00605/mc01953/mc02067/mc02368/mc04394/mc04714/mc05272/mc05412/mc05611/mc07274/mc07464/mc07508/mc07817/mc09221/mc09440/mc10530/mc10654/mc10806/mc11359/mc11876/mc12296/mc12487/mc12972/mc13063/mc13866/mc15674/mc17077/mc17592/mc18387/mc19854/mc19911/mc20147/mc20875/mc21165/mc22339/mc22491/mc23338/mc23508/mc23709/mc23942/mc23961/mc24415/mc25002/mc25164/mc25278/mc25682/mc25761/mc26005/mc26263…	80
BP	GO:0051258	protein polymerization	31/1994	121/16975	1.85331e-05	0.000787657	0.000623298	mc00522/mc00667/mc00794/mc01816/mc02433/mc06516/mc06754/mc07240/mc08523/mc10888/mc12088/mc12587/mc12700/mc14245/mc14908/mc15134/mc16854/mc21547/mc22043/mc23813/mc24338/mc25020/mc26139/mc27146/mc27477/mc32644/mc34246/mc34417/mc35040/mc35273/mc40435	31
BP	GO:0097306	cellular response to alcohol	80/1994	431/16975	1.99455e-05	0.000833786	0.000659801	mc00473/mc00605/mc01953/mc02067/mc02368/mc04394/mc04714/mc05272/mc05412/mc05611/mc07274/mc07464/mc07508/mc07817/mc09221/mc09440/mc10530/mc10654/mc10806/mc11359/mc11876/mc12296/mc12487/mc12972/mc13063/mc13866/mc15674/mc17077/mc17592/mc18387/mc19854/mc19911/mc20147/mc20875/mc21165/mc22339/mc22491/mc23338/mc23508/mc23709/mc23942/mc23961/mc24415/mc25002/mc25164/mc25278/mc25682/mc25761/mc26005/mc26263…	80
BP	GO:0070726	cell wall assembly	13/1994	31/16975	2.06975e-05	0.000836237	0.00066174	mc02059/mc12088/mc12377/mc12515/mc12979/mc16854/mc21701/mc22350/mc24762/mc26391/mc27477/mc32835/mc33021	13
BP	GO:0071668	plant-type cell wall assembly	13/1994	31/16975	2.06975e-05	0.000836237	0.00066174	mc02059/mc12088/mc12377/mc12515/mc12979/mc16854/mc21701/mc22350/mc24762/mc26391/mc27477/mc32835/mc33021	13
BP	GO:0009267	cellular response to starvation	52/1994	248/16975	2.09879e-05	0.000836237	0.00066174	mc00360/mc00602/mc01464/mc01475/mc01652/mc01660/mc04394/mc05388/mc05506/mc05817/mc07508/mc07617/mc08105/mc08926/mc09440/mc09985/mc10718/mc11876/mc12165/mc12700/mc14314/mc15078/mc16318/mc16776/mc17077/mc17497/mc17911/mc18077/mc19441/mc19673/mc20512/mc20659/mc21675/mc22043/mc23423/mc23591/mc24415/mc27146/mc27218/mc28014/mc28854/mc29092/mc30307/mc30370/mc32099/mc33062/mc34808/mc34817/mc36873/mc38042…	52
BP	GO:0008064	regulation of actin polymerization or depolymerization	25/1994	89/16975	2.18961e-05	0.000845987	0.000669456	mc00522/mc00667/mc02433/mc06516/mc06754/mc07240/mc08523/mc10888/mc12088/mc12700/mc14245/mc14908/mc15134/mc16854/mc21547/mc22043/mc23813/mc24338/mc25020/mc27146/mc27477/mc32644/mc34246/mc35273/mc40435	25
BP	GO:0030832	regulation of actin filament length	25/1994	89/16975	2.18961e-05	0.000845987	0.000669456	mc00522/mc00667/mc02433/mc06516/mc06754/mc07240/mc08523/mc10888/mc12088/mc12700/mc14245/mc14908/mc15134/mc16854/mc21547/mc22043/mc23813/mc24338/mc25020/mc27146/mc27477/mc32644/mc34246/mc35273/mc40435	25
BP	GO:0032956	regulation of actin cytoskeleton organization	29/1994	111/16975	2.29082e-05	0.000871881	0.000689946	mc00522/mc00667/mc02254/mc02433/mc06516/mc06754/mc07240/mc08523/mc10888/mc12088/mc12700/mc12729/mc14245/mc14908/mc15134/mc16854/mc21547/mc22043/mc22076/mc23813/mc24338/mc24962/mc25020/mc27146/mc27477/mc32644/mc34246/mc35273/mc40435	29
BP	GO:0043549	regulation of kinase activity	39/1994	169/16975	2.37343e-05	0.000890037	0.000704314	mc00155/mc00280/mc00428/mc01394/mc04599/mc07720/mc09107/mc09365/mc09790/mc09850/mc10718/mc10880/mc11200/mc13143/mc13233/mc14657/mc16319/mc16349/mc18029/mc18984/mc19034/mc19673/mc20064/mc20540/mc22623/mc22698/mc23591/mc24590/mc25920/mc28462/mc28924/mc29293/mc30532/mc33338/mc34016/mc34119/mc36140/mc36209/mc38900	39
BP	GO:0070613	regulation of protein processing	7/1994	10/16975	2.65439e-05	0.00095707	0.000757359	mc04089/mc08235/mc12575/mc26154/mc32755/mc40266/mc40274	7
BP	GO:1903317	regulation of protein maturation	7/1994	10/16975	2.65439e-05	0.00095707	0.000757359	mc04089/mc08235/mc12575/mc26154/mc32755/mc40266/mc40274	7
BP	GO:0043101	purine-containing compound salvage	8/1994	13/16975	2.66478e-05	0.00095707	0.000757359	mc06133/mc07099/mc13985/mc14617/mc21600/mc32569/mc33735/mc34645	8
BP	GO:0032970	regulation of actin filament-based process	29/1994	112/16975	2.74887e-05	0.000973559	0.000770408	mc00522/mc00667/mc02254/mc02433/mc06516/mc06754/mc07240/mc08523/mc10888/mc12088/mc12700/mc12729/mc14245/mc14908/mc15134/mc16854/mc21547/mc22043/mc22076/mc23813/mc24338/mc24962/mc25020/mc27146/mc27477/mc32644/mc34246/mc35273/mc40435	29
BP	GO:0033119	negative regulation of RNA splicing	10/1994	20/16975	2.95949e-05	0.00101982	0.000807018	mc02605/mc07373/mc14139/mc15221/mc19535/mc21468/mc24212/mc25432/mc38159/mc40358	10
BP	GO:0048025	negative regulation of mRNA splicing, via spliceosome	10/1994	20/16975	2.95949e-05	0.00101982	0.000807018	mc02605/mc07373/mc14139/mc15221/mc19535/mc21468/mc24212/mc25432/mc38159/mc40358	10
BP	GO:0048534	hematopoietic or lymphoid organ development	17/1994	50/16975	3.12339e-05	0.00106195	0.000840357	mc02605/mc03749/mc04004/mc08330/mc09847/mc11239/mc12555/mc19535/mc20064/mc21468/mc24212/mc25268/mc25920/mc26177/mc32787/mc33338/mc38159	17
BP	GO:0110053	regulation of actin filament organization	25/1994	91/16975	3.30916e-05	0.00111031	0.000878624	mc00522/mc00667/mc02433/mc06516/mc06754/mc07240/mc08523/mc10888/mc12088/mc12700/mc14245/mc14908/mc15134/mc16854/mc21547/mc22043/mc23813/mc24338/mc25020/mc27146/mc27477/mc32644/mc34246/mc35273/mc40435	25
BP	GO:0019827	stem cell population maintenance	33/1994	137/16975	3.95292e-05	0.0012923	0.00102264	mc02739/mc03749/mc04394/mc07508/mc09847/mc10655/mc11239/mc12236/mc12267/mc12511/mc15937/mc16318/mc16583/mc18077/mc19748/mc20141/mc20512/mc21529/mc21573/mc21827/mc23509/mc24415/mc25998/mc26224/mc26557/mc26597/mc27854/mc32610/mc33256/mc38042/mc38262/mc39004/mc39141	33
BP	GO:0098727	maintenance of cell number	33/1994	137/16975	3.95292e-05	0.0012923	0.00102264	mc02739/mc03749/mc04394/mc07508/mc09847/mc10655/mc11239/mc12236/mc12267/mc12511/mc15937/mc16318/mc16583/mc18077/mc19748/mc20141/mc20512/mc21529/mc21573/mc21827/mc23509/mc24415/mc25998/mc26224/mc26557/mc26597/mc27854/mc32610/mc33256/mc38042/mc38262/mc39004/mc39141	33
BP	GO:0022413	reproductive process in single-celled organism	9/1994	17/16975	4.19955e-05	0.00133861	0.00105928	mc07787/mc13559/mc16318/mc18077/mc20512/mc23064/mc26836/mc29636/mc30894	9
BP	GO:0032505	reproduction of a single-celled organism	9/1994	17/16975	4.19955e-05	0.00133861	0.00105928	mc07787/mc13559/mc16318/mc18077/mc20512/mc23064/mc26836/mc29636/mc30894	9
BP	GO:0010087	phloem or xylem histogenesis	41/1994	186/16975	4.62839e-05	0.00145708	0.00115304	mc01096/mc01618/mc01727/mc04286/mc04705/mc07414/mc07808/mc09440/mc09605/mc10698/mc10724/mc11876/mc12236/mc12296/mc12572/mc15889/mc17077/mc17304/mc19696/mc20101/mc21529/mc21949/mc23225/mc23570/mc23596/mc25468/mc25952/mc26156/mc26557/mc26945/mc27084/mc29621/mc30878/mc32571/mc32759/mc33297/mc33716/mc34632/mc34897/mc38897/mc38931	41
BP	GO:0032147	activation of protein kinase activity	23/1994	82/16975	4.72269e-05	0.00146864	0.00116218	mc00155/mc00280/mc00428/mc01394/mc09365/mc10718/mc13143/mc13233/mc16319/mc16349/mc18029/mc19673/mc20540/mc22623/mc22698/mc23591/mc24590/mc28462/mc34016/mc34119/mc36140/mc36209/mc38900	23
BP	GO:1900150	regulation of defense response to fungus	17/1994	52/16975	5.53126e-05	0.00167268	0.00132364	mc01953/mc04089/mc08235/mc09221/mc13063/mc15728/mc16349/mc18029/mc20540/mc22491/mc25749/mc29366/mc30623/mc33527/mc36140/mc40266/mc40274	17
BP	GO:0015698	inorganic anion transport	36/1994	157/16975	5.53688e-05	0.00167268	0.00132364	mc01005/mc01464/mc01475/mc01652/mc01660/mc01691/mc02422/mc05388/mc05506/mc06133/mc07099/mc10329/mc10486/mc10658/mc11998/mc12165/mc13142/mc13985/mc14617/mc16566/mc16776/mc17497/mc22624/mc23510/mc24346/mc24592/mc27343/mc27625/mc27838/mc34570/mc34808/mc34817/mc39003/mc39157/mc39648/mc39934	36
BP	GO:0045637	regulation of myeloid cell differentiation	8/1994	14/16975	5.5756e-05	0.00167268	0.00132364	mc04004/mc08330/mc12555/mc19535/mc21468/mc25268/mc26177/mc32787	8
BP	GO:0045860	positive regulation of protein kinase activity	28/1994	111/16975	6.21989e-05	0.00184427	0.00145943	mc00155/mc00280/mc00428/mc01394/mc04599/mc07720/mc09365/mc09850/mc10718/mc13143/mc13233/mc16319/mc16349/mc18029/mc19034/mc19673/mc20540/mc22623/mc22698/mc23591/mc24590/mc28462/mc28924/mc34016/mc34119/mc36140/mc36209/mc38900	28
BP	GO:0010810	regulation of cell-substrate adhesion	7/1994	11/16975	6.55566e-05	0.00189965	0.00150325	mc02254/mc12729/mc16318/mc18077/mc20512/mc22076/mc24962	7
BP	GO:0071588	hydrogen peroxide mediated signaling pathway	7/1994	11/16975	6.55566e-05	0.00189965	0.00150325	mc04084/mc08241/mc10274/mc19544/mc21465/mc25321/mc35681	7
BP	GO:0010074	maintenance of meristem identity	24/1994	90/16975	7.9406e-05	0.00227129	0.00179734	mc04394/mc07508/mc10655/mc12236/mc12511/mc15937/mc16318/mc16583/mc18077/mc19748/mc20141/mc20512/mc21529/mc21827/mc23509/mc24415/mc25998/mc26224/mc26557/mc27854/mc33256/mc38042/mc39004/mc39141	24
BP	GO:0031399	regulation of protein modification process	65/1994	346/16975	8.0163e-05	0.00227129	0.00179734	mc00155/mc00280/mc00428/mc01394/mc01613/mc04599/mc04844/mc06516/mc06716/mc06746/mc07720/mc09107/mc09365/mc09790/mc09850/mc10718/mc10880/mc11200/mc12487/mc12575/mc13143/mc13233/mc13636/mc14245/mc14514/mc14553/mc14657/mc14916/mc14953/mc15134/mc16319/mc16345/mc16349/mc18029/mc18984/mc19034/mc19673/mc19771/mc20064/mc20540/mc22623/mc22698/mc23125/mc23591/mc24590/mc25920/mc26154/mc26263/mc26884/mc28462…	65
BP	GO:1903706	regulation of hemopoiesis	11/1994	26/16975	8.17937e-05	0.00227414	0.0017996	mc03749/mc04004/mc08330/mc09847/mc11239/mc12555/mc19535/mc21468/mc25268/mc26177/mc32787	11
BP	GO:0051094	positive regulation of developmental process	55/1994	280/16975	8.22454e-05	0.00227414	0.0017996	mc01953/mc02061/mc02233/mc03323/mc05378/mc05523/mc05999/mc06217/mc06422/mc06923/mc09047/mc09294/mc10530/mc11473/mc12078/mc12511/mc12759/mc13063/mc13586/mc13873/mc13970/mc13973/mc14149/mc14652/mc14657/mc15217/mc16318/mc16583/mc16708/mc16870/mc17481/mc18077/mc19535/mc20512/mc21468/mc21827/mc22345/mc22491/mc22494/mc23091/mc23415/mc24650/mc26224/mc26865/mc27062/mc27451/mc27663/mc27789/mc27854/mc30469…	55
BP	GO:0050686	negative regulation of mRNA processing	10/1994	22/16975	8.29391e-05	0.00227414	0.0017996	mc02605/mc07373/mc14139/mc15221/mc19535/mc21468/mc24212/mc25432/mc38159/mc40358	10
BP	GO:0007178	transmembrane receptor protein serine/threonine kinase signaling pathway	59/1994	307/16975	8.77503e-05	0.00238046	0.00188373	mc00824/mc00835/mc01836/mc01847/mc02538/mc04255/mc04947/mc06266/mc06865/mc07274/mc07385/mc08015/mc09605/mc10308/mc12047/mc12139/mc12397/mc13867/mc14754/mc14814/mc15354/mc15409/mc16276/mc16349/mc16745/mc16839/mc16902/mc17304/mc17766/mc18029/mc18602/mc20540/mc21717/mc23228/mc23407/mc23658/mc23918/mc25444/mc26948/mc27057/mc27410/mc27496/mc27534/mc27612/mc28682/mc29428/mc29961/mc32107/mc32992/mc35062…	59
BP	GO:0009292	genetic transfer	16/1994	49/16975	9.24961e-05	0.00238247	0.00188533	mc01223/mc01475/mc01563/mc01652/mc04070/mc09193/mc12153/mc16787/mc25300/mc27560/mc29350/mc30603/mc33841/mc34707/mc34808/mc40240	16
BP	GO:0009294	DNA mediated transformation	16/1994	49/16975	9.24961e-05	0.00238247	0.00188533	mc01223/mc01475/mc01563/mc01652/mc04070/mc09193/mc12153/mc16787/mc25300/mc27560/mc29350/mc30603/mc33841/mc34707/mc34808/mc40240	16
BP	GO:0015865	purine nucleotide transport	16/1994	49/16975	9.24961e-05	0.00238247	0.00188533	mc00090/mc04916/mc07089/mc07970/mc08344/mc10488/mc13310/mc13979/mc14634/mc16564/mc20037/mc25260/mc27837/mc29460/mc33374/mc40180	16
BP	GO:0015868	purine ribonucleotide transport	16/1994	49/16975	9.24961e-05	0.00238247	0.00188533	mc00090/mc04916/mc07089/mc07970/mc08344/mc10488/mc13310/mc13979/mc14634/mc16564/mc20037/mc25260/mc27837/mc29460/mc33374/mc40180	16
BP	GO:0051503	adenine nucleotide transport	16/1994	49/16975	9.24961e-05	0.00238247	0.00188533	mc00090/mc04916/mc07089/mc07970/mc08344/mc10488/mc13310/mc13979/mc14634/mc16564/mc20037/mc25260/mc27837/mc29460/mc33374/mc40180	16
BP	GO:0043410	positive regulation of MAPK cascade	13/1994	35/16975	9.4191e-05	0.00240187	0.00190068	mc00428/mc01394/mc09365/mc12487/mc16349/mc18029/mc20540/mc26263/mc28462/mc32884/mc34016/mc34119/mc36140	13
BP	GO:0007166	cell surface receptor signaling pathway	79/1994	444/16975	9.93293e-05	0.00250782	0.00198452	mc00824/mc00835/mc01836/mc01847/mc02538/mc03749/mc04020/mc04255/mc04947/mc05678/mc06266/mc06682/mc06865/mc07274/mc07385/mc08015/mc08314/mc09605/mc09847/mc10308/mc11239/mc12047/mc12139/mc12397/mc13867/mc14464/mc14754/mc14814/mc14978/mc15354/mc15409/mc15460/mc16276/mc16349/mc16663/mc16745/mc16839/mc16902/mc17304/mc17766/mc18029/mc18468/mc18602/mc20064/mc20540/mc21717/mc23228/mc23407/mc23658/mc23918…	79
BP	GO:0019220	regulation of phosphate metabolic process	52/1994	263/16975	0.000106631	0.00263989	0.00208903	mc00155/mc00280/mc00428/mc01394/mc01613/mc04599/mc04844/mc06716/mc07720/mc09107/mc09365/mc09790/mc09850/mc10718/mc10880/mc11200/mc12487/mc12575/mc13143/mc13233/mc14514/mc14657/mc14953/mc16319/mc16349/mc18029/mc18984/mc19034/mc19673/mc20064/mc20540/mc22623/mc22698/mc23591/mc24590/mc25920/mc26154/mc26263/mc28462/mc28924/mc29293/mc30532/mc32755/mc32884/mc33338/mc33726/mc34016/mc34119/mc34638/mc36140…	52
BP	GO:0051174	regulation of phosphorus metabolic process	52/1994	263/16975	0.000106631	0.00263989	0.00208903	mc00155/mc00280/mc00428/mc01394/mc01613/mc04599/mc04844/mc06716/mc07720/mc09107/mc09365/mc09790/mc09850/mc10718/mc10880/mc11200/mc12487/mc12575/mc13143/mc13233/mc14514/mc14657/mc14953/mc16319/mc16349/mc18029/mc18984/mc19034/mc19673/mc20064/mc20540/mc22623/mc22698/mc23591/mc24590/mc25920/mc26154/mc26263/mc28462/mc28924/mc29293/mc30532/mc32755/mc32884/mc33338/mc33726/mc34016/mc34119/mc34638/mc36140…	52
BP	GO:0051493	regulation of cytoskeleton organization	31/1994	132/16975	0.000110823	0.00271729	0.00215028	mc00522/mc00667/mc02254/mc02433/mc06516/mc06754/mc07240/mc08523/mc09178/mc10888/mc12088/mc12700/mc12729/mc14245/mc14908/mc15134/mc16854/mc21547/mc22043/mc22076/mc23813/mc24338/mc24962/mc25020/mc27146/mc27477/mc30589/mc32644/mc34246/mc35273/mc40435	31
BP	GO:0006897	endocytosis	38/1994	175/16975	0.000120459	0.00292544	0.00231499	mc01981/mc02233/mc02682/mc04286/mc05384/mc05514/mc05710/mc06218/mc06602/mc06922/mc07414/mc09697/mc10034/mc10888/mc11513/mc11974/mc12473/mc12759/mc13025/mc14358/mc15820/mc16084/mc17490/mc20014/mc21153/mc23813/mc24158/mc24681/mc25468/mc25868/mc26522/mc28146/mc32902/mc33400/mc37035/mc38221/mc39596/mc40070	38
BP	GO:0043281	regulation of cysteine-type endopeptidase activity involved in apoptotic process	9/1994	19/16975	0.000128056	0.00308059	0.00243777	mc12575/mc13585/mc20064/mc23090/mc25920/mc26154/mc26864/mc32755/mc33338	9
BP	GO:0009991	response to extracellular stimulus	76/1994	427/16975	0.000132093	0.00314801	0.00249112	mc00104/mc00360/mc00428/mc00602/mc01394/mc01464/mc01475/mc01652/mc01660/mc02254/mc04394/mc05388/mc05506/mc05817/mc07508/mc07617/mc08105/mc08926/mc09129/mc09440/mc09985/mc10718/mc11876/mc12165/mc12247/mc12348/mc12700/mc12729/mc13288/mc13866/mc14314/mc15078/mc16318/mc16704/mc16776/mc17077/mc17497/mc17911/mc18077/mc19441/mc19673/mc20512/mc20659/mc21675/mc22043/mc22076/mc22759/mc23423/mc23591/mc24415…	76
BP	GO:0033674	positive regulation of kinase activity	28/1994	116/16975	0.000141856	0.00334939	0.00265047	mc00155/mc00280/mc00428/mc01394/mc04599/mc07720/mc09365/mc09850/mc10718/mc13143/mc13233/mc16319/mc16349/mc18029/mc19034/mc19673/mc20540/mc22623/mc22698/mc23591/mc24590/mc28462/mc28924/mc34016/mc34119/mc36140/mc36209/mc38900	28
BP	GO:1902532	negative regulation of intracellular signal transduction	21/1994	77/16975	0.000153935	0.00360123	0.00284977	mc00488/mc04020/mc06684/mc08314/mc09107/mc09206/mc09790/mc11200/mc14465/mc14977/mc18984/mc20064/mc25278/mc25920/mc29293/mc30532/mc30612/mc33338/mc34212/mc35217/mc40205	21
BP	GO:0030162	regulation of proteolysis	40/1994	190/16975	0.000163758	0.00379621	0.00300406	mc03527/mc04089/mc04308/mc05627/mc07436/mc08235/mc09308/mc09628/mc10952/mc11650/mc12575/mc12949/mc13585/mc13636/mc15460/mc16345/mc18468/mc18788/mc20064/mc22303/mc23090/mc23125/mc23887/mc24351/mc24790/mc25920/mc26154/mc26864/mc26884/mc28549/mc29681/mc30219/mc31388/mc32755/mc33338/mc36150/mc37967/mc38501/mc40266/mc40274	40
BP	GO:0010150	leaf senescence	51/1994	261/16975	0.000167693	0.0038524	0.00304853	mc00476/mc00612/mc01577/mc01953/mc02061/mc04729/mc05999/mc06422/mc06716/mc07184/mc07835/mc09440/mc09846/mc10658/mc10681/mc11235/mc11876/mc12064/mc12296/mc12348/mc12551/mc13063/mc14149/mc14514/mc14953/mc14963/mc15217/mc15704/mc17077/mc19029/mc19716/mc19876/mc21867/mc22345/mc22491/mc23510/mc25727/mc26418/mc27436/mc29601/mc30852/mc32571/mc32793/mc33048/mc33548/mc33810/mc34203/mc35192/mc38964/mc39003…	51
BP	GO:0016036	cellular response to phosphate starvation	26/1994	106/16975	0.000183243	0.00417205	0.00330147	mc00360/mc00602/mc04394/mc05388/mc05506/mc07508/mc08105/mc09440/mc09985/mc11876/mc12165/mc16776/mc17077/mc17497/mc17911/mc19441/mc20659/mc21675/mc23423/mc24415/mc30307/mc32099/mc33062/mc36873/mc38042/mc39934	26
BP	GO:0030111	regulation of Wnt signaling pathway	10/1994	24/16975	0.000201529	0.00446868	0.00353621	mc02538/mc05678/mc06682/mc14464/mc14978/mc16663/mc27193/mc27961/mc38103/mc39280	10
BP	GO:0060070	canonical Wnt signaling pathway	10/1994	24/16975	0.000201529	0.00446868	0.00353621	mc02538/mc05678/mc06682/mc14464/mc14978/mc16663/mc27193/mc27961/mc38103/mc39280	10
BP	GO:0060828	regulation of canonical Wnt signaling pathway	10/1994	24/16975	0.000201529	0.00446868	0.00353621	mc02538/mc05678/mc06682/mc14464/mc14978/mc16663/mc27193/mc27961/mc38103/mc39280	10
BP	GO:0010077	maintenance of inflorescence meristem identity	9/1994	20/16975	0.000208615	0.00447032	0.0035375	mc12236/mc12511/mc16583/mc21529/mc21827/mc26224/mc26557/mc27854/mc39141	9
BP	GO:0010215	cellulose microfibril organization	9/1994	20/16975	0.000208615	0.00447032	0.0035375	mc02059/mc12088/mc12515/mc12979/mc16854/mc22350/mc24762/mc27477/mc32835	9
BP	GO:0034260	negative regulation of GTPase activity	9/1994	20/16975	0.000208615	0.00447032	0.0035375	mc02254/mc04625/mc06516/mc12729/mc14245/mc15134/mc22076/mc24962/mc30930	9
BP	GO:1902358	sulfate transmembrane transport	9/1994	20/16975	0.000208615	0.00447032	0.0035375	mc01005/mc01464/mc01660/mc01691/mc11998/mc27343/mc34570/mc34817/mc39648	9
BP	GO:0042546	cell wall biogenesis	60/1994	324/16975	0.0002214	0.00470475	0.00372302	mc01033/mc01096/mc01618/mc02059/mc02191/mc03323/mc03413/mc03525/mc03815/mc03877/mc04705/mc05435/mc06713/mc07808/mc09294/mc09626/mc10698/mc10724/mc11329/mc11386/mc11654/mc11783/mc12088/mc12377/mc12515/mc12979/mc14511/mc16854/mc17182/mc17322/mc17565/mc19174/mc19696/mc21313/mc21701/mc21830/mc22162/mc22350/mc23570/mc23596/mc24006/mc24762/mc26222/mc26391/mc27477/mc29621/mc29760/mc30109/mc30878/mc31417…	60
BP	GO:0031669	cellular response to nutrient levels	55/1994	291/16975	0.000233472	0.00491605	0.00389022	mc00360/mc00602/mc01464/mc01475/mc01652/mc01660/mc04394/mc05388/mc05506/mc05817/mc07508/mc07617/mc08105/mc08926/mc09440/mc09985/mc10718/mc11876/mc12165/mc12247/mc12700/mc14314/mc15078/mc16318/mc16776/mc17077/mc17497/mc17911/mc18077/mc19441/mc19673/mc20512/mc20659/mc21675/mc22043/mc23423/mc23591/mc24415/mc26573/mc27146/mc27218/mc28014/mc28854/mc29092/mc30307/mc30370/mc32099/mc32643/mc33062/mc34808…	55
BP	GO:0071669	plant-type cell wall organization or biogenesis	71/1994	400/16975	0.000235199	0.00491605	0.00389022	mc01033/mc01096/mc01511/mc01618/mc02059/mc02191/mc03323/mc03413/mc03525/mc03815/mc03877/mc04705/mc05435/mc06713/mc07808/mc09243/mc09294/mc09626/mc10601/mc10698/mc10724/mc11329/mc11386/mc11654/mc11783/mc12088/mc12377/mc12515/mc12979/mc13189/mc14511/mc16854/mc17182/mc17322/mc17565/mc19174/mc19446/mc19559/mc19696/mc19800/mc21092/mc21313/mc21701/mc21830/mc22162/mc22350/mc22577/mc22784/mc23570/mc23596…	71
BP	GO:0009736	cytokinin-activated signaling pathway	27/1994	114/16975	0.000257987	0.00534015	0.00422582	mc01975/mc02434/mc04394/mc05627/mc07508/mc08530/mc09440/mc11876/mc12354/mc13031/mc15937/mc17077/mc20141/mc20151/mc21685/mc22466/mc24335/mc24415/mc25998/mc26008/mc29681/mc30219/mc33039/mc33246/mc33256/mc38042/mc40438	27
BP	GO:0006862	nucleotide transport	16/1994	53/16975	0.000259678	0.00534015	0.00422582	mc00090/mc04916/mc07089/mc07970/mc08344/mc10488/mc13310/mc13979/mc14634/mc16564/mc20037/mc25260/mc27837/mc29460/mc33374/mc40180	16
BP	GO:0098661	inorganic anion transmembrane transport	19/1994	69/16975	0.000272495	0.00552424	0.00437151	mc01005/mc01464/mc01660/mc01691/mc06133/mc07099/mc11998/mc12165/mc13142/mc13985/mc14617/mc16776/mc22624/mc24592/mc27343/mc34570/mc34817/mc39648/mc39934	19
BP	GO:0006023	aminoglycan biosynthetic process	7/1994	13/16975	0.000275129	0.00552424	0.00437151	mc01511/mc02538/mc13189/mc22577/mc24548/mc33916/mc38103	7
BP	GO:0006024	glycosaminoglycan biosynthetic process	7/1994	13/16975	0.000275129	0.00552424	0.00437151	mc01511/mc02538/mc13189/mc22577/mc24548/mc33916/mc38103	7
BP	GO:1902903	regulation of supramolecular fiber organization	25/1994	103/16975	0.000287689	0.0057313	0.00453536	mc00522/mc00667/mc02433/mc06516/mc06754/mc07240/mc08523/mc10888/mc12088/mc12700/mc14245/mc14908/mc15134/mc16854/mc21547/mc22043/mc23813/mc24338/mc25020/mc27146/mc27477/mc32644/mc34246/mc35273/mc40435	25
BP	GO:0048582	positive regulation of post-embryonic development	32/1994	145/16975	0.000294087	0.00575715	0.00455582	mc05378/mc05523/mc06217/mc06923/mc09047/mc10530/mc11473/mc12511/mc13586/mc13873/mc13970/mc13973/mc14652/mc14657/mc16583/mc16708/mc17481/mc21827/mc22494/mc23091/mc23415/mc24650/mc26224/mc26865/mc27062/mc27663/mc27789/mc27854/mc30469/mc32103/mc39141/mc39347	32
BP	GO:0016055	Wnt signaling pathway	10/1994	25/16975	0.000300699	0.00575715	0.00455582	mc02538/mc05678/mc06682/mc14464/mc14978/mc16663/mc27193/mc27961/mc38103/mc39280	10
BP	GO:0030155	regulation of cell adhesion	10/1994	25/16975	0.000300699	0.00575715	0.00455582	mc02254/mc12729/mc16318/mc18077/mc20064/mc20512/mc22076/mc24962/mc25920/mc33338	10
BP	GO:0198738	cell-cell signaling by wnt	10/1994	25/16975	0.000300699	0.00575715	0.00455582	mc02538/mc05678/mc06682/mc14464/mc14978/mc16663/mc27193/mc27961/mc38103/mc39280	10
BP	GO:1905114	cell surface receptor signaling pathway involved in cell-cell signaling	10/1994	25/16975	0.000300699	0.00575715	0.00455582	mc02538/mc05678/mc06682/mc14464/mc14978/mc16663/mc27193/mc27961/mc38103/mc39280	10
BP	GO:0009834	plant-type secondary cell wall biogenesis	28/1994	121/16975	0.000302533	0.00575715	0.00455582	mc01096/mc01618/mc03413/mc03525/mc03815/mc04705/mc06713/mc07808/mc09626/mc10698/mc10724/mc11329/mc11654/mc11783/mc14511/mc17182/mc17322/mc19174/mc19696/mc21313/mc23570/mc23596/mc29621/mc30878/mc33716/mc34632/mc38897/mc38931	28
BP	GO:0048513	animal organ development	33/1994	152/16975	0.000327762	0.00619105	0.00489917	mc02605/mc03212/mc03749/mc04004/mc05678/mc06682/mc08330/mc09847/mc11239/mc12555/mc12949/mc14464/mc14978/mc16663/mc19535/mc20064/mc21468/mc22303/mc23960/mc24212/mc24790/mc25268/mc25920/mc26177/mc27193/mc27961/mc29832/mc30038/mc32787/mc33338/mc38159/mc38418/mc39280	33
BP	GO:0022411	cellular component disassembly	31/1994	140/16975	0.000341003	0.00632165	0.00500252	mc00732/mc01780/mc05249/mc05638/mc06716/mc06754/mc07240/mc10724/mc12348/mc13599/mc13636/mc14514/mc14908/mc14953/mc15693/mc19535/mc19865/mc21468/mc23099/mc23125/mc23596/mc25020/mc25704/mc26418/mc26871/mc26884/mc30234/mc33048/mc33579/mc34954/mc38897	31
BP	GO:0007167	enzyme linked receptor protein signaling pathway	61/1994	336/16975	0.000341687	0.00632165	0.00500252	mc00824/mc00835/mc01836/mc01847/mc02538/mc04255/mc04947/mc06266/mc06865/mc07274/mc07385/mc08015/mc09605/mc10308/mc12047/mc12139/mc12397/mc13867/mc14754/mc14814/mc15354/mc15409/mc15460/mc16276/mc16349/mc16745/mc16839/mc16902/mc17304/mc17766/mc18029/mc18468/mc18602/mc20540/mc21717/mc23228/mc23407/mc23658/mc23918/mc25444/mc26948/mc27057/mc27410/mc27496/mc27534/mc27612/mc28682/mc29428/mc29961/mc32107…	61
BP	GO:0071368	cellular response to cytokinin stimulus	27/1994	116/16975	0.000348013	0.00632165	0.00500252	mc01975/mc02434/mc04394/mc05627/mc07508/mc08530/mc09440/mc11876/mc12354/mc13031/mc15937/mc17077/mc20141/mc20151/mc21685/mc22466/mc24335/mc24415/mc25998/mc26008/mc29681/mc30219/mc33039/mc33246/mc33256/mc38042/mc40438	27
BP	GO:0090693	plant organ senescence	51/1994	269/16975	0.000357994	0.00632165	0.00500252	mc00476/mc00612/mc01577/mc01953/mc02061/mc04729/mc05999/mc06422/mc06716/mc07184/mc07835/mc09440/mc09846/mc10658/mc10681/mc11235/mc11876/mc12064/mc12296/mc12348/mc12551/mc13063/mc14149/mc14514/mc14953/mc14963/mc15217/mc15704/mc17077/mc19029/mc19716/mc19876/mc21867/mc22345/mc22491/mc23510/mc25727/mc26418/mc27436/mc29601/mc30852/mc32571/mc32793/mc33048/mc33548/mc33810/mc34203/mc35192/mc38964/mc39003…	51
BP	GO:0006919	activation of cysteine-type endopeptidase activity involved in apoptotic process	6/1994	10/16975	0.000359466	0.00632165	0.00500252	mc13585/mc20064/mc23090/mc25920/mc26864/mc33338	6
BP	GO:0010394	homogalacturonan metabolic process	6/1994	10/16975	0.000359466	0.00632165	0.00500252	mc01033/mc03323/mc09294/mc31417/mc34593/mc34828	6
BP	GO:0031321	ascospore-type prospore assembly	6/1994	10/16975	0.000359466	0.00632165	0.00500252	mc07787/mc13559/mc23064/mc26836/mc29636/mc30894	6
BP	GO:0045785	positive regulation of cell adhesion	6/1994	10/16975	0.000359466	0.00632165	0.00500252	mc16318/mc18077/mc20064/mc20512/mc25920/mc33338	6
BP	GO:0051639	actin filament network formation	6/1994	10/16975	0.000359466	0.00632165	0.00500252	mc12440/mc15779/mc21757/mc25806/mc32941/mc33468	6
BP	GO:0120009	intermembrane lipid transfer	6/1994	10/16975	0.000359466	0.00632165	0.00500252	mc07787/mc13559/mc23064/mc26836/mc29636/mc30894	6
BP	GO:0002520	immune system development	17/1994	60/16975	0.000390204	0.0068152	0.00539308	mc02605/mc03749/mc04004/mc08330/mc09847/mc11239/mc12555/mc19535/mc20064/mc21468/mc24212/mc25268/mc25920/mc26177/mc32787/mc33338/mc38159	17
BP	GO:0120036	plasma membrane bounded cell projection organization	30/1994	135/16975	0.00039529	0.00685707	0.00542622	mc02233/mc02254/mc03212/mc05751/mc06634/mc12078/mc12178/mc12700/mc12729/mc12759/mc13198/mc14415/mc16663/mc16764/mc16870/mc16993/mc22043/mc22076/mc22536/mc24519/mc24962/mc27146/mc27193/mc27294/mc27451/mc27961/mc39280/mc39597/mc39764/mc39946	30
BP	GO:1903312	negative regulation of mRNA metabolic process	14/1994	45/16975	0.000441217	0.00758676	0.00600364	mc00476/mc00612/mc02605/mc07373/mc14139/mc15221/mc19535/mc21468/mc24212/mc25432/mc34203/mc35192/mc38159/mc40358	14
BP	GO:0044087	regulation of cellular component biogenesis	49/1994	258/16975	0.000443305	0.00758676	0.00600364	mc00522/mc00667/mc01096/mc01618/mc02254/mc02433/mc03332/mc03413/mc04705/mc06516/mc06754/mc07240/mc07808/mc08523/mc09308/mc10698/mc10888/mc11783/mc12088/mc12700/mc12729/mc14245/mc14908/mc15134/mc16854/mc17182/mc19696/mc21547/mc22043/mc22076/mc23570/mc23813/mc24338/mc24962/mc25020/mc27146/mc27477/mc28549/mc29621/mc30878/mc31388/mc31433/mc32644/mc33716/mc34246/mc34632/mc35273/mc38931/mc40435	49
BP	GO:0009738	abscisic acid-activated signaling pathway	68/1994	388/16975	0.000454747	0.00773069	0.00611754	mc00473/mc00605/mc01953/mc02067/mc02368/mc04394/mc04714/mc05272/mc05412/mc05611/mc07274/mc07464/mc07508/mc07817/mc10530/mc10654/mc11359/mc12296/mc12972/mc13063/mc13866/mc15674/mc17592/mc18387/mc19854/mc19911/mc20147/mc20875/mc21165/mc22339/mc22491/mc23338/mc23508/mc23942/mc23961/mc24415/mc25002/mc25164/mc25278/mc25682/mc25761/mc26005/mc27005/mc27055/mc27789/mc28021/mc28682/mc29834/mc29999/mc30041…	68
BP	GO:0010158	abaxial cell fate specification	7/1994	14/16975	0.000494502	0.00800889	0.00633769	mc01192/mc12181/mc16761/mc27587/mc33801/mc34681/mc39949	7
BP	GO:0030330	DNA damage response, signal transduction by p53 class mediator	9/1994	22/16975	0.000496237	0.00800889	0.00633769	mc04004/mc08330/mc12555/mc13585/mc23090/mc25268/mc26177/mc26864/mc32787	9
BP	GO:0031571	mitotic G1 DNA damage checkpoint	9/1994	22/16975	0.000496237	0.00800889	0.00633769	mc04004/mc08330/mc12555/mc13585/mc23090/mc25268/mc26177/mc26864/mc32787	9
BP	GO:0031589	cell-substrate adhesion	9/1994	22/16975	0.000496237	0.00800889	0.00633769	mc02254/mc12473/mc12729/mc16318/mc18077/mc20512/mc22076/mc24962/mc32902	9
BP	GO:0044783	G1 DNA damage checkpoint	9/1994	22/16975	0.000496237	0.00800889	0.00633769	mc04004/mc08330/mc12555/mc13585/mc23090/mc25268/mc26177/mc26864/mc32787	9
BP	GO:0044819	mitotic G1/S transition checkpoint	9/1994	22/16975	0.000496237	0.00800889	0.00633769	mc04004/mc08330/mc12555/mc13585/mc23090/mc25268/mc26177/mc26864/mc32787	9
BP	GO:1902807	negative regulation of cell cycle G1/S phase transition	9/1994	22/16975	0.000496237	0.00800889	0.00633769	mc04004/mc08330/mc12555/mc13585/mc23090/mc25268/mc26177/mc26864/mc32787	9
BP	GO:2000134	negative regulation of G1/S transition of mitotic cell cycle	9/1994	22/16975	0.000496237	0.00800889	0.00633769	mc04004/mc08330/mc12555/mc13585/mc23090/mc25268/mc26177/mc26864/mc32787	9
BP	GO:0000904	cell morphogenesis involved in differentiation	75/1994	439/16975	0.000520208	0.0082836	0.00655507	mc00794/mc01223/mc01563/mc01816/mc02434/mc02634/mc02739/mc04079/mc04101/mc04511/mc04903/mc05751/mc06634/mc07376/mc08023/mc08225/mc08250/mc08530/mc09221/mc10724/mc10791/mc10864/mc12015/mc12078/mc12088/mc12506/mc14415/mc15779/mc16854/mc16870/mc18387/mc20460/mc20875/mc21547/mc23145/mc23596/mc23694/mc23797/mc24176/mc24335/mc25433/mc25806/mc25964/mc26229/mc26896/mc27451/mc27477/mc29366/mc29422/mc29466…	75
BP	GO:0002275	myeloid cell activation involved in immune response	8/1994	18/16975	0.000526252	0.0082836	0.00655507	mc06226/mc06908/mc22622/mc23960/mc24591/mc29832/mc30038/mc38418	8
BP	GO:0030099	myeloid cell differentiation	8/1994	18/16975	0.000526252	0.0082836	0.00655507	mc04004/mc08330/mc12555/mc19535/mc21468/mc25268/mc26177/mc32787	8
BP	GO:0036230	granulocyte activation	8/1994	18/16975	0.000526252	0.0082836	0.00655507	mc06226/mc06908/mc22622/mc23960/mc24591/mc29832/mc30038/mc38418	8
BP	GO:0043624	cellular protein complex disassembly	20/1994	78/16975	0.000530302	0.00828405	0.00655543	mc00732/mc01780/mc05249/mc05638/mc06754/mc07240/mc10724/mc13599/mc14908/mc15693/mc19865/mc23099/mc23596/mc25020/mc25704/mc26871/mc30234/mc33579/mc34954/mc38897	20
BP	GO:0010431	seed maturation	27/1994	119/16975	0.000534981	0.00828405	0.00655543	mc02313/mc02774/mc04070/mc04655/mc09047/mc10659/mc12642/mc15730/mc16318/mc18077/mc19743/mc19899/mc20512/mc21977/mc23511/mc24086/mc25002/mc25300/mc27099/mc28021/mc29845/mc30918/mc33523/mc38286/mc38402/mc39002/mc40240	27
BP	GO:0015748	organophosphate ester transport	26/1994	113/16975	0.000536027	0.00828405	0.00655543	mc00090/mc00531/mc00683/mc04916/mc07089/mc07787/mc07970/mc08344/mc10488/mc13310/mc13559/mc13979/mc14634/mc16564/mc20037/mc21951/mc23064/mc25260/mc26836/mc27085/mc27837/mc29460/mc29636/mc30894/mc33374/mc40180	26
BP	GO:0043455	regulation of secondary metabolic process	22/1994	90/16975	0.000585087	0.00898779	0.00711232	mc03388/mc05627/mc05902/mc06500/mc07617/mc07927/mc09485/mc11816/mc13298/mc15146/mc16909/mc17151/mc22778/mc24462/mc25002/mc27395/mc28021/mc28854/mc29681/mc30219/mc30762/mc39702	22
BP	GO:0044764	multi-organism cellular process	19/1994	73/16975	0.000592242	0.00904322	0.00715618	mc01223/mc01475/mc01563/mc01652/mc04070/mc09193/mc12153/mc12700/mc16787/mc22043/mc25300/mc27146/mc27560/mc29350/mc30603/mc33841/mc34707/mc34808/mc40240	19
BP	GO:0043406	positive regulation of MAP kinase activity	10/1994	27/16975	0.000622268	0.00944514	0.00747423	mc00428/mc01394/mc09365/mc16349/mc18029/mc20540/mc28462/mc34016/mc34119/mc36140	10
BP	GO:0010162	seed dormancy process	18/1994	68/16975	0.00065751	0.00986264	0.00780462	mc02313/mc04070/mc09047/mc12642/mc15730/mc16318/mc18077/mc19899/mc20512/mc21977/mc25002/mc25300/mc27099/mc28021/mc29845/mc33523/mc38402/mc40240	18
BP	GO:0022611	dormancy process	18/1994	68/16975	0.00065751	0.00986264	0.00780462	mc02313/mc04070/mc09047/mc12642/mc15730/mc16318/mc18077/mc19899/mc20512/mc21977/mc25002/mc25300/mc27099/mc28021/mc29845/mc33523/mc38402/mc40240	18
BP	GO:0062197	cellular response to chemical stress	45/1994	236/16975	0.000679816	0.0100868	0.00798201	mc00090/mc01475/mc01652/mc01975/mc03964/mc04005/mc04728/mc05049/mc05817/mc06354/mc06734/mc07218/mc07833/mc08114/mc09985/mc10887/mc13031/mc13310/mc13636/mc13665/mc14069/mc14314/mc14930/mc15078/mc16956/mc18718/mc19159/mc19441/mc21328/mc22466/mc23125/mc23158/mc23505/mc23812/mc25230/mc26884/mc26905/mc27350/mc29022/mc29603/mc34808/mc36873/mc38582/mc39005/mc39656	45
BP	GO:0050832	defense response to fungus	75/1994	443/16975	0.000680366	0.0100868	0.00798201	mc00408/mc00733/mc00772/mc00944/mc01096/mc01618/mc01744/mc01808/mc01953/mc02419/mc03413/mc03524/mc04089/mc04620/mc04714/mc04950/mc05911/mc07817/mc07927/mc08019/mc08105/mc08235/mc09221/mc10491/mc10601/mc11655/mc11783/mc12296/mc12315/mc12348/mc12487/mc13063/mc13866/mc14224/mc15151/mc15728/mc16349/mc17182/mc17321/mc18029/mc19800/mc20540/mc21103/mc21637/mc22491/mc24347/mc25749/mc26263/mc26418/mc26655…	75
BP	GO:0031398	positive regulation of protein ubiquitination	11/1994	32/16975	0.000699919	0.0101829	0.00805801	mc12575/mc13636/mc16345/mc20064/mc23125/mc25920/mc26154/mc26884/mc32755/mc33338/mc36150	11
BP	GO:1903322	positive regulation of protein modification by small protein conjugation or removal	11/1994	32/16975	0.000699919	0.0101829	0.00805801	mc12575/mc13636/mc16345/mc20064/mc23125/mc25920/mc26154/mc26884/mc32755/mc33338/mc36150	11
BP	GO:2000027	regulation of animal organ morphogenesis	11/1994	32/16975	0.000699919	0.0101829	0.00805801	mc03749/mc05678/mc06682/mc09847/mc11239/mc14464/mc14978/mc16663/mc27193/mc27961/mc39280	11
BP	GO:0032984	protein-containing complex disassembly	23/1994	97/16975	0.000702816	0.0101829	0.00805801	mc00732/mc01780/mc05249/mc05638/mc06754/mc07240/mc10724/mc13599/mc13636/mc14908/mc15693/mc19865/mc23099/mc23125/mc23596/mc25020/mc25704/mc26871/mc26884/mc30234/mc33579/mc34954/mc38897	23
BP	GO:0009113	purine nucleobase biosynthetic process	6/1994	11/16975	0.000712158	0.0102599	0.00811898	mc06133/mc07099/mc13985/mc14617/mc22997/mc26789	6
BP	GO:0009903	chloroplast avoidance movement	13/1994	42/16975	0.000739784	0.0104803	0.00829336	mc01905/mc02706/mc06211/mc06939/mc08808/mc09950/mc19477/mc19644/mc23628/mc24141/mc34326/mc35111/mc36762	13
BP	GO:0035265	organ growth	13/1994	42/16975	0.000739784	0.0104803	0.00829336	mc02061/mc05999/mc06422/mc09107/mc14149/mc15217/mc22345/mc23960/mc29293/mc29832/mc30038/mc30532/mc38418	13
BP	GO:1901679	nucleotide transmembrane transport	13/1994	42/16975	0.000739784	0.0104803	0.00829336	mc00090/mc04916/mc07970/mc08344/mc10488/mc13310/mc16564/mc20037/mc25260/mc27837/mc29460/mc33374/mc40180	13
BP	GO:0000070	mitotic sister chromatid segregation	20/1994	80/16975	0.000752182	0.0105388	0.00833969	mc02059/mc05249/mc05638/mc10724/mc12351/mc12949/mc12979/mc13781/mc14657/mc22303/mc22350/mc23327/mc23596/mc24762/mc24790/mc26414/mc30234/mc32174/mc33043/mc38897	20
BP	GO:0016236	macroautophagy	20/1994	80/16975	0.000752182	0.0105388	0.00833969	mc04079/mc06716/mc08250/mc11985/mc12348/mc12587/mc13636/mc14514/mc14953/mc16063/mc16979/mc23125/mc26139/mc26418/mc26496/mc26884/mc27316/mc33048/mc39623/mc40254	20
BP	GO:0007093	mitotic cell cycle checkpoint	16/1994	58/16975	0.000791462	0.0110286	0.00872725	mc01223/mc01563/mc04004/mc08330/mc12555/mc13585/mc13781/mc23090/mc23327/mc25268/mc26177/mc26864/mc32174/mc32787/mc33841/mc34707	16
BP	GO:0002274	myeloid leukocyte activation	8/1994	19/16975	0.00081585	0.011185	0.00885107	mc06226/mc06908/mc22622/mc23960/mc24591/mc29832/mc30038/mc38418	8
BP	GO:0010262	somatic embryogenesis	8/1994	19/16975	0.00081585	0.011185	0.00885107	mc02774/mc04200/mc13298/mc22778/mc24086/mc24462/mc25392/mc38286	8
BP	GO:2000050	regulation of non-canonical Wnt signaling pathway	8/1994	19/16975	0.00081585	0.011185	0.00885107	mc05678/mc06682/mc14464/mc14978/mc16663/mc27193/mc27961/mc39280	8
BP	GO:0051338	regulation of transferase activity	40/1994	205/16975	0.000826914	0.0112761	0.00892313	mc00155/mc00280/mc00428/mc01394/mc04599/mc07720/mc09107/mc09365/mc09790/mc09850/mc10718/mc10880/mc11200/mc13143/mc13233/mc14657/mc16319/mc16349/mc17400/mc18029/mc18984/mc19034/mc19673/mc20064/mc20540/mc22623/mc22698/mc23591/mc24590/mc25920/mc28462/mc28924/mc29293/mc30532/mc33338/mc34016/mc34119/mc36140/mc36209/mc38900	40
BP	GO:0046847	filopodium assembly	7/1994	15/16975	0.00083343	0.0113045	0.00894561	mc02254/mc12700/mc12729/mc22043/mc22076/mc24962/mc27146	7
BP	GO:0030030	cell projection organization	30/1994	141/16975	0.000848664	0.0114502	0.00906093	mc02233/mc02254/mc03212/mc05751/mc06634/mc12078/mc12178/mc12700/mc12729/mc12759/mc13198/mc14415/mc16663/mc16764/mc16870/mc16993/mc22043/mc22076/mc22536/mc24519/mc24962/mc27146/mc27193/mc27294/mc27451/mc27961/mc39280/mc39597/mc39764/mc39946	30
BP	GO:0051261	protein depolymerization	14/1994	48/16975	0.000908871	0.012198	0.00965267	mc05249/mc05638/mc06754/mc07240/mc10724/mc14908/mc15693/mc19865/mc23596/mc25020/mc25704/mc30234/mc33579/mc38897	14
BP	GO:0045321	leukocyte activation	11/1994	33/16975	0.000939588	0.0125442	0.00992664	mc06226/mc06908/mc20064/mc22622/mc23960/mc24591/mc25920/mc29832/mc30038/mc33338/mc38418	11
BP	GO:0008356	asymmetric cell division	16/1994	59/16975	0.0009693	0.0128735	0.0101872	mc02739/mc03749/mc03832/mc05405/mc09221/mc09847/mc11239/mc11344/mc12271/mc14657/mc17609/mc26604/mc29366/mc30623/mc32607/mc38262	16
BP	GO:0000226	microtubule cytoskeleton organization	42/1994	220/16975	0.000981917	0.0129735	0.0102663	mc00794/mc01816/mc02059/mc02254/mc03429/mc05249/mc05638/mc07787/mc09178/mc10724/mc11765/mc12178/mc12351/mc12729/mc12949/mc12979/mc13559/mc16319/mc16764/mc17203/mc22076/mc22303/mc22350/mc22940/mc23064/mc23596/mc24762/mc24790/mc24962/mc26414/mc26739/mc26836/mc29636/mc30234/mc30589/mc30894/mc33043/mc34417/mc35040/mc36209/mc38897/mc39946	42
BP	GO:2000045	regulation of G1/S transition of mitotic cell cycle	9/1994	24/16975	0.00104839	0.0137702	0.0108968	mc04004/mc08330/mc12555/mc13585/mc23090/mc25268/mc26177/mc26864/mc32787	9
BP	GO:0051495	positive regulation of cytoskeleton organization	15/1994	54/16975	0.00105652	0.0137702	0.0108968	mc00522/mc00667/mc02254/mc02433/mc08523/mc12729/mc21547/mc22076/mc24338/mc24962/mc25020/mc32644/mc34246/mc35273/mc40435	15
BP	GO:0000288	nuclear-transcribed mRNA catabolic process, deadenylation-dependent decay	17/1994	65/16975	0.00106382	0.0137702	0.0108968	mc03419/mc03547/mc04004/mc08330/mc09826/mc11625/mc11776/mc12267/mc12555/mc17350/mc19011/mc21573/mc25268/mc26177/mc26597/mc32610/mc32787	17
BP	GO:0071472	cellular response to salt stress	17/1994	65/16975	0.00106382	0.0137702	0.0108968	mc01975/mc05049/mc06354/mc06734/mc07218/mc08114/mc13031/mc13665/mc14069/mc14930/mc16956/mc22466/mc23158/mc26905/mc27350/mc29022/mc39656	17
BP	GO:0009911	positive regulation of flower development	18/1994	71/16975	0.00113836	0.0146608	0.0116015	mc05378/mc05523/mc11473/mc12511/mc13873/mc13973/mc14652/mc16583/mc17481/mc21827/mc22494/mc23415/mc24650/mc26224/mc27062/mc27854/mc32103/mc39141	18
BP	GO:0018105	peptidyl-serine phosphorylation	31/1994	150/16975	0.00116436	0.0148934	0.0117856	mc04714/mc05710/mc06218/mc06602/mc06922/mc07817/mc09850/mc11974/mc14358/mc15674/mc17911/mc19034/mc19854/mc19911/mc20147/mc20659/mc23942/mc23961/mc25682/mc25761/mc26005/mc29834/mc29999/mc30041/mc30868/mc33250/mc33713/mc34631/mc38415/mc38440/mc39596	31
BP	GO:0048354	mucilage biosynthetic process involved in seed coat development	10/1994	29/16975	0.00118533	0.0148934	0.0117856	mc07376/mc12377/mc12551/mc21701/mc21867/mc25433/mc25964/mc26391/mc32793/mc33021	10
BP	GO:0007033	vacuole organization	27/1994	125/16975	0.00118628	0.0148934	0.0117856	mc00531/mc00683/mc04079/mc06198/mc06716/mc06984/mc08250/mc09863/mc11267/mc11985/mc12348/mc12700/mc13636/mc14514/mc14744/mc14953/mc15418/mc16979/mc22043/mc23125/mc26418/mc26884/mc27146/mc27316/mc33048/mc39623/mc40254	27
BP	GO:0009902	chloroplast relocation	13/1994	44/16975	0.00120247	0.0148934	0.0117856	mc01905/mc02706/mc06211/mc06939/mc08808/mc09950/mc19477/mc19644/mc23628/mc24141/mc34326/mc35111/mc36762	13
BP	GO:0051667	establishment of plastid localization	13/1994	44/16975	0.00120247	0.0148934	0.0117856	mc01905/mc02706/mc06211/mc06939/mc08808/mc09950/mc19477/mc19644/mc23628/mc24141/mc34326/mc35111/mc36762	13
BP	GO:0080112	seed growth	13/1994	44/16975	0.00120247	0.0148934	0.0117856	mc04394/mc07508/mc10648/mc14729/mc15422/mc15937/mc19756/mc20141/mc24415/mc25998/mc33256/mc38042/mc39011	13
BP	GO:0080113	regulation of seed growth	13/1994	44/16975	0.00120247	0.0148934	0.0117856	mc04394/mc07508/mc10648/mc14729/mc15422/mc15937/mc19756/mc20141/mc24415/mc25998/mc33256/mc38042/mc39011	13
BP	GO:0035567	non-canonical Wnt signaling pathway	8/1994	20/16975	0.00122067	0.0148934	0.0117856	mc05678/mc06682/mc14464/mc14978/mc16663/mc27193/mc27961/mc39280	8
BP	GO:0060071	Wnt signaling pathway, planar cell polarity pathway	8/1994	20/16975	0.00122067	0.0148934	0.0117856	mc05678/mc06682/mc14464/mc14978/mc16663/mc27193/mc27961/mc39280	8
BP	GO:0090175	regulation of establishment of planar polarity	8/1994	20/16975	0.00122067	0.0148934	0.0117856	mc05678/mc06682/mc14464/mc14978/mc16663/mc27193/mc27961/mc39280	8
BP	GO:1905330	regulation of morphogenesis of an epithelium	8/1994	20/16975	0.00122067	0.0148934	0.0117856	mc05678/mc06682/mc14464/mc14978/mc16663/mc27193/mc27961/mc39280	8
BP	GO:0031099	regeneration	11/1994	34/16975	0.00124321	0.0150074	0.0118758	mc02774/mc04200/mc13198/mc13298/mc22536/mc22778/mc24086/mc24462/mc24519/mc25392/mc38286	11
BP	GO:0006977	DNA damage response, signal transduction by p53 class mediator resulting in cell cycle arrest	6/1994	12/16975	0.00128299	0.0150074	0.0118758	mc04004/mc08330/mc12555/mc25268/mc26177/mc32787	6
BP	GO:0018871	1-aminocyclopropane-1-carboxylate metabolic process	6/1994	12/16975	0.00128299	0.0150074	0.0118758	mc05807/mc06575/mc09293/mc14323/mc15072/mc28576	6
BP	GO:0030951	establishment or maintenance of microtubule cytoskeleton polarity	6/1994	12/16975	0.00128299	0.0150074	0.0118758	mc05249/mc05638/mc10724/mc23596/mc30234/mc38897	6
BP	GO:0030952	establishment or maintenance of cytoskeleton polarity	6/1994	12/16975	0.00128299	0.0150074	0.0118758	mc05249/mc05638/mc10724/mc23596/mc30234/mc38897	6
BP	GO:0042218	1-aminocyclopropane-1-carboxylate biosynthetic process	6/1994	12/16975	0.00128299	0.0150074	0.0118758	mc05807/mc06575/mc09293/mc14323/mc15072/mc28576	6
BP	GO:0050667	homocysteine metabolic process	6/1994	12/16975	0.00128299	0.0150074	0.0118758	mc04551/mc15896/mc20109/mc28893/mc30989/mc33288	6
BP	GO:0072431	signal transduction involved in mitotic G1 DNA damage checkpoint	6/1994	12/16975	0.00128299	0.0150074	0.0118758	mc04004/mc08330/mc12555/mc25268/mc26177/mc32787	6
BP	GO:1902400	intracellular signal transduction involved in G1 DNA damage checkpoint	6/1994	12/16975	0.00128299	0.0150074	0.0118758	mc04004/mc08330/mc12555/mc25268/mc26177/mc32787	6
BP	GO:0010243	response to organonitrogen compound	80/1994	490/16975	0.00136741	0.0159219	0.0125995	mc00428/mc00488/mc01394/mc01936/mc02620/mc03552/mc04247/mc04705/mc04950/mc07213/mc07378/mc07927/mc08019/mc09308/mc09647/mc09985/mc10263/mc11617/mc12146/mc12700/mc13079/mc13636/mc14458/mc14529/mc14780/mc14940/mc14988/mc15392/mc15704/mc15825/mc16014/mc16096/mc16349/mc16791/mc17360/mc17911/mc18029/mc19441/mc19558/mc19876/mc20022/mc20540/mc20659/mc21448/mc22043/mc22508/mc23125/mc24064/mc24196/mc24640…	80
BP	GO:0018209	peptidyl-serine modification	31/1994	152/16975	0.00145739	0.0168924	0.0133675	mc04714/mc05710/mc06218/mc06602/mc06922/mc07817/mc09850/mc11974/mc14358/mc15674/mc17911/mc19034/mc19854/mc19911/mc20147/mc20659/mc23942/mc23961/mc25682/mc25761/mc26005/mc29834/mc29999/mc30041/mc30868/mc33250/mc33713/mc34631/mc38415/mc38440/mc39596	31
BP	GO:0031347	regulation of defense response	72/1994	434/16975	0.00150893	0.0173644	0.013741	mc00428/mc00488/mc00835/mc01394/mc01847/mc01953/mc04089/mc04714/mc04950/mc05885/mc06226/mc06908/mc07817/mc07927/mc08019/mc08235/mc09221/mc10329/mc12064/mc12296/mc12444/mc12575/mc13063/mc13889/mc15135/mc15704/mc15728/mc16345/mc16349/mc18029/mc19159/mc19752/mc19876/mc20064/mc20540/mc21328/mc22491/mc23426/mc23505/mc24059/mc25727/mc25749/mc25920/mc26154/mc27069/mc27436/mc27625/mc28335/mc29366/mc29425…	72
BP	GO:1905037	autophagosome organization	13/1994	45/16975	0.00151172	0.0173644	0.013741	mc06716/mc11985/mc12348/mc13636/mc14514/mc14953/mc16979/mc23125/mc26418/mc26884/mc27316/mc33048/mc39623	13
BP	GO:0098657	import into cell	34/1994	172/16975	0.00155324	0.0177612	0.014055	mc01981/mc02233/mc02682/mc04286/mc05384/mc05514/mc05710/mc06218/mc06602/mc06922/mc07414/mc09697/mc10034/mc11513/mc11974/mc12473/mc12759/mc13025/mc14358/mc15820/mc16084/mc17490/mc20014/mc21153/mc24158/mc24681/mc25468/mc25868/mc26522/mc32902/mc33400/mc37035/mc38221/mc39596	34
BP	GO:0010026	trichome differentiation	37/1994	192/16975	0.00159963	0.0182101	0.0144102	mc00794/mc01223/mc01563/mc01816/mc02434/mc02634/mc02739/mc04079/mc04101/mc07376/mc08225/mc08250/mc08530/mc09221/mc10724/mc12506/mc21547/mc23596/mc24176/mc24335/mc25433/mc25964/mc26229/mc29366/mc30623/mc32644/mc32842/mc33841/mc34417/mc34707/mc35040/mc38193/mc38262/mc38897/mc40254/mc40278/mc40438	37
BP	GO:0032878	regulation of establishment or maintenance of cell polarity	11/1994	35/16975	0.001623	0.0183939	0.0145557	mc02254/mc03791/mc06516/mc09880/mc11290/mc12729/mc14245/mc15134/mc22076/mc24962/mc34323	11
BP	GO:0030178	negative regulation of Wnt signaling pathway	8/1994	21/16975	0.00177053	0.0198892	0.0157389	mc05678/mc06682/mc14464/mc14978/mc16663/mc27193/mc27961/mc39280	8
BP	GO:0090090	negative regulation of canonical Wnt signaling pathway	8/1994	21/16975	0.00177053	0.0198892	0.0157389	mc05678/mc06682/mc14464/mc14978/mc16663/mc27193/mc27961/mc39280	8
BP	GO:0051347	positive regulation of transferase activity	29/1994	142/16975	0.00199207	0.0221759	0.0175485	mc00155/mc00280/mc00428/mc01394/mc04599/mc07720/mc09365/mc09850/mc10718/mc13143/mc13233/mc16319/mc16349/mc17400/mc18029/mc19034/mc19673/mc20540/mc22623/mc22698/mc23591/mc24590/mc28462/mc28924/mc34016/mc34119/mc36140/mc36209/mc38900	29
BP	GO:0043271	negative regulation of ion transport	12/1994	41/16975	0.00200888	0.0221759	0.0175485	mc09440/mc11876/mc12078/mc13636/mc15460/mc16870/mc17077/mc18468/mc23125/mc26884/mc27451/mc39764	12
BP	GO:0051225	spindle assembly	12/1994	41/16975	0.00200888	0.0221759	0.0175485	mc02059/mc03429/mc09178/mc11765/mc12351/mc12979/mc17203/mc22350/mc24762/mc26414/mc30589/mc33043	12
BP	GO:0051303	establishment of chromosome localization	12/1994	41/16975	0.00200888	0.0221759	0.0175485	mc03791/mc05249/mc05638/mc09880/mc10724/mc11290/mc12351/mc23596/mc26414/mc30234/mc33043/mc38897	12
BP	GO:0030203	glycosaminoglycan metabolic process	7/1994	17/16975	0.00203656	0.0223846	0.0177137	mc01511/mc02538/mc13189/mc22577/mc24548/mc33916/mc38103	7
BP	GO:0002221	pattern recognition receptor signaling pathway	10/1994	31/16975	0.00210704	0.0227158	0.0179757	mc00835/mc01847/mc12575/mc16349/mc18029/mc20540/mc26154/mc32755/mc35069/mc36140	10
BP	GO:0010256	endomembrane system organization	30/1994	149/16975	0.00211959	0.0227158	0.0179757	mc02221/mc02254/mc03876/mc04079/mc04326/mc05433/mc06198/mc06237/mc06516/mc06984/mc08250/mc10834/mc12729/mc14245/mc14744/mc15134/mc15418/mc17567/mc22076/mc22124/mc23749/mc24006/mc24362/mc24930/mc24962/mc29760/mc30109/mc38360/mc38668/mc40254	30
BP	GO:0031344	regulation of cell projection organization	14/1994	52/16975	0.00212499	0.0227158	0.0179757	mc02254/mc12078/mc12729/mc13198/mc16870/mc16993/mc22076/mc22536/mc24519/mc24962/mc27294/mc27451/mc39597/mc39764	14
BP	GO:0120035	regulation of plasma membrane bounded cell projection organization	14/1994	52/16975	0.00212499	0.0227158	0.0179757	mc02254/mc12078/mc12729/mc13198/mc16870/mc16993/mc22076/mc22536/mc24519/mc24962/mc27294/mc27451/mc39597/mc39764	14
BP	GO:0000188	inactivation of MAPK activity	6/1994	13/16975	0.00214686	0.0227158	0.0179757	mc09107/mc09790/mc11200/mc18984/mc29293/mc30532	6
BP	GO:0009652	thigmotropism	6/1994	13/16975	0.00214686	0.0227158	0.0179757	mc01475/mc01652/mc04599/mc07720/mc28924/mc34808	6
BP	GO:0030437	ascospore formation	6/1994	13/16975	0.00214686	0.0227158	0.0179757	mc07787/mc13559/mc23064/mc26836/mc29636/mc30894	6
BP	GO:0043407	negative regulation of MAP kinase activity	6/1994	13/16975	0.00214686	0.0227158	0.0179757	mc09107/mc09790/mc11200/mc18984/mc29293/mc30532	6
BP	GO:0043935	sexual sporulation resulting in formation of a cellular spore	6/1994	13/16975	0.00214686	0.0227158	0.0179757	mc07787/mc13559/mc23064/mc26836/mc29636/mc30894	6
BP	GO:0009787	regulation of abscisic acid-activated signaling pathway	41/1994	223/16975	0.00233862	0.0244405	0.0193405	mc00473/mc00605/mc01953/mc02067/mc02368/mc04394/mc05272/mc05412/mc05611/mc07508/mc10654/mc11359/mc12296/mc12972/mc13063/mc13866/mc17592/mc22339/mc22491/mc23338/mc23508/mc23961/mc24415/mc25002/mc25164/mc27005/mc27055/mc28021/mc29834/mc30041/mc30213/mc30469/mc32164/mc32571/mc33713/mc34201/mc34631/mc35187/mc38042/mc38415/mc40427	41
BP	GO:1901419	regulation of response to alcohol	41/1994	223/16975	0.00233862	0.0244405	0.0193405	mc00473/mc00605/mc01953/mc02067/mc02368/mc04394/mc05272/mc05412/mc05611/mc07508/mc10654/mc11359/mc12296/mc12972/mc13063/mc13866/mc17592/mc22339/mc22491/mc23338/mc23508/mc23961/mc24415/mc25002/mc25164/mc27005/mc27055/mc28021/mc29834/mc30041/mc30213/mc30469/mc32164/mc32571/mc33713/mc34201/mc34631/mc35187/mc38042/mc38415/mc40427	41
BP	GO:1905957	regulation of cellular response to alcohol	41/1994	223/16975	0.00233862	0.0244405	0.0193405	mc00473/mc00605/mc01953/mc02067/mc02368/mc04394/mc05272/mc05412/mc05611/mc07508/mc10654/mc11359/mc12296/mc12972/mc13063/mc13866/mc17592/mc22339/mc22491/mc23338/mc23508/mc23961/mc24415/mc25002/mc25164/mc27005/mc27055/mc28021/mc29834/mc30041/mc30213/mc30469/mc32164/mc32571/mc33713/mc34201/mc34631/mc35187/mc38042/mc38415/mc40427	41
BP	GO:0071555	cell wall organization	50/1994	285/16975	0.00236197	0.0245838	0.0194539	mc01033/mc01500/mc01511/mc02059/mc02553/mc03323/mc06713/mc07927/mc09065/mc09243/mc09294/mc10601/mc12088/mc12296/mc12377/mc12515/mc12979/mc13189/mc14511/mc16025/mc16854/mc19446/mc19559/mc19800/mc21092/mc21701/mc22108/mc22350/mc22577/mc24548/mc24762/mc24942/mc26391/mc27477/mc28639/mc29267/mc30506/mc30762/mc31417/mc32517/mc32571/mc32835/mc33021/mc33916/mc33942/mc34593/mc34828/mc36870/mc38120/mc39057	50
BP	GO:0032102	negative regulation of response to external stimulus	16/1994	64/16975	0.00244835	0.0253793	0.0200834	mc04714/mc06226/mc06908/mc07817/mc13198/mc16345/mc19752/mc20064/mc22536/mc23505/mc24519/mc25920/mc30868/mc33338/mc36150/mc39005	16
BP	GO:0009788	negative regulation of abscisic acid-activated signaling pathway	23/1994	106/16975	0.0024846	0.0254447	0.0201352	mc01953/mc02368/mc04394/mc05412/mc07508/mc11359/mc13063/mc13866/mc17592/mc22491/mc23338/mc23961/mc24415/mc25164/mc27005/mc27055/mc29834/mc30041/mc30469/mc32164/mc38042/mc38415/mc40427	23
BP	GO:1901420	negative regulation of response to alcohol	23/1994	106/16975	0.0024846	0.0254447	0.0201352	mc01953/mc02368/mc04394/mc05412/mc07508/mc11359/mc13063/mc13866/mc17592/mc22491/mc23338/mc23961/mc24415/mc25164/mc27005/mc27055/mc29834/mc30041/mc30469/mc32164/mc38042/mc38415/mc40427	23
BP	GO:1905958	negative regulation of cellular response to alcohol	23/1994	106/16975	0.0024846	0.0254447	0.0201352	mc01953/mc02368/mc04394/mc05412/mc07508/mc11359/mc13063/mc13866/mc17592/mc22491/mc23338/mc23961/mc24415/mc25164/mc27005/mc27055/mc29834/mc30041/mc30469/mc32164/mc38042/mc38415/mc40427	23
BP	GO:0090506	axillary shoot meristem initiation	8/1994	22/16975	0.00249869	0.0254867	0.0201684	mc04394/mc07508/mc15937/mc20141/mc24415/mc25998/mc33256/mc38042	8
BP	GO:0032436	positive regulation of proteasomal ubiquitin-dependent protein catabolic process	12/1994	42/16975	0.00251651	0.0255662	0.0202313	mc10952/mc12949/mc13636/mc16345/mc18788/mc22303/mc23125/mc23887/mc24790/mc26884/mc36150/mc38501	12
BP	GO:0043254	regulation of protein-containing complex assembly	30/1994	151/16975	0.00261989	0.0265107	0.0209788	mc00522/mc00667/mc02433/mc03332/mc06516/mc06754/mc07240/mc08523/mc09308/mc10888/mc12088/mc12700/mc14245/mc14908/mc15134/mc16854/mc21547/mc22043/mc23813/mc24338/mc25020/mc27146/mc27477/mc28549/mc31388/mc31433/mc32644/mc34246/mc35273/mc40435	30
BP	GO:0007264	small GTPase mediated signal transduction	11/1994	37/16975	0.00266637	0.0267687	0.0211829	mc12078/mc12351/mc14657/mc16870/mc20064/mc25920/mc26414/mc27451/mc33043/mc33338/mc39764	11
BP	GO:0045010	actin nucleation	11/1994	37/16975	0.00266637	0.0267687	0.0211829	mc00522/mc00667/mc02433/mc08523/mc21547/mc24338/mc25020/mc32644/mc34246/mc35273/mc40435	11
BP	GO:0009909	regulation of flower development	47/1994	266/16975	0.00271191	0.0271191	0.0214602	mc01936/mc02774/mc04863/mc05378/mc05523/mc06179/mc07027/mc07926/mc09440/mc11473/mc11876/mc11955/mc12511/mc13079/mc13573/mc13873/mc13973/mc14652/mc16583/mc17077/mc17481/mc18010/mc20013/mc20558/mc21827/mc22494/mc22508/mc23071/mc23415/mc24086/mc24640/mc24650/mc25866/mc26224/mc26847/mc27062/mc27276/mc27854/mc29493/mc29845/mc30763/mc32103/mc33403/mc38286/mc38402/mc39141/mc39581	47
BP	GO:0001736	establishment of planar polarity	10/1994	32/16975	0.00274664	0.0271471	0.0214823	mc05678/mc06682/mc12296/mc14464/mc14978/mc16663/mc27193/mc27961/mc32571/mc39280	10
BP	GO:0001738	morphogenesis of a polarized epithelium	10/1994	32/16975	0.00274664	0.0271471	0.0214823	mc05678/mc06682/mc12296/mc14464/mc14978/mc16663/mc27193/mc27961/mc32571/mc39280	10
BP	GO:1902806	regulation of cell cycle G1/S phase transition	10/1994	32/16975	0.00274664	0.0271471	0.0214823	mc04004/mc08330/mc12555/mc13585/mc14657/mc23090/mc25268/mc26177/mc26864/mc32787	10
BP	GO:0019750	chloroplast localization	13/1994	48/16975	0.00285639	0.0279072	0.0220839	mc01905/mc02706/mc06211/mc06939/mc08808/mc09950/mc19477/mc19644/mc23628/mc24141/mc34326/mc35111/mc36762	13
BP	GO:0050777	negative regulation of immune response	13/1994	48/16975	0.00285639	0.0279072	0.0220839	mc06226/mc06908/mc07115/mc14007/mc14594/mc14754/mc15409/mc19752/mc20064/mc23505/mc25920/mc33338/mc39005	13
BP	GO:0051644	plastid localization	13/1994	48/16975	0.00285639	0.0279072	0.0220839	mc01905/mc02706/mc06211/mc06939/mc08808/mc09950/mc19477/mc19644/mc23628/mc24141/mc34326/mc35111/mc36762	13
BP	GO:0002683	negative regulation of immune system process	16/1994	65/16975	0.00290045	0.0282296	0.0223389	mc03749/mc06226/mc06908/mc07115/mc09847/mc11239/mc14007/mc14594/mc14754/mc15409/mc19752/mc20064/mc23505/mc25920/mc33338/mc39005	16
BP	GO:0031627	telomeric loop formation	7/1994	18/16975	0.00299767	0.0290648	0.0229999	mc03569/mc04033/mc08300/mc09304/mc09662/mc17378/mc40212	7
BP	GO:0048666	neuron development	18/1994	77/16975	0.00302247	0.0291943	0.0231024	mc02233/mc03749/mc05751/mc06634/mc09847/mc11239/mc12078/mc12759/mc13198/mc14415/mc16870/mc16993/mc22536/mc24519/mc27294/mc27451/mc39597/mc39764	18
BP	GO:0043161	proteasome-mediated ubiquitin-dependent protein catabolic process	76/1994	475/16975	0.0030585	0.0294308	0.0232895	mc02061/mc02402/mc02634/mc02669/mc03527/mc03806/mc04178/mc04308/mc05627/mc05999/mc06020/mc06400/mc06422/mc07144/mc07212/mc07213/mc07436/mc08609/mc09308/mc09628/mc09897/mc10494/mc10762/mc10952/mc11311/mc11650/mc12949/mc13636/mc14125/mc14149/mc14458/mc14527/mc14529/mc14940/mc14941/mc14988/mc15217/mc15239/mc15580/mc15678/mc16345/mc16561/mc18300/mc18611/mc18788/mc19091/mc20804/mc22303/mc22345/mc23125…	76
BP	GO:0009612	response to mechanical stimulus	12/1994	43/16975	0.00312378	0.029946	0.0236972	mc01475/mc01652/mc04599/mc04728/mc07720/mc07833/mc12700/mc22043/mc27146/mc28924/mc29603/mc34808	12
BP	GO:0034293	sexual sporulation	15/1994	60/16975	0.00329909	0.0309485	0.0244905	mc03904/mc05470/mc07787/mc11412/mc13559/mc15881/mc20092/mc20460/mc23064/mc25943/mc26836/mc29636/mc30894/mc33307/mc35774	15
BP	GO:0001775	cell activation	11/1994	38/16975	0.00336078	0.0309485	0.0244905	mc06226/mc06908/mc20064/mc22622/mc23960/mc24591/mc25920/mc29832/mc30038/mc33338/mc38418	11
BP	GO:0051017	actin filament bundle assembly	11/1994	38/16975	0.00336078	0.0309485	0.0244905	mc10616/mc12440/mc12700/mc15779/mc21757/mc22043/mc25806/mc27146/mc32941/mc33468/mc39050	11
BP	GO:0061572	actin filament bundle organization	11/1994	38/16975	0.00336078	0.0309485	0.0244905	mc10616/mc12440/mc12700/mc15779/mc21757/mc22043/mc25806/mc27146/mc32941/mc33468/mc39050	11
BP	GO:0002521	leukocyte differentiation	5/1994	10/16975	0.00336772	0.0309485	0.0244905	mc19535/mc20064/mc21468/mc25920/mc33338	5
BP	GO:0046398	UDP-glucuronate metabolic process	5/1994	10/16975	0.00336772	0.0309485	0.0244905	mc01511/mc13189/mc22577/mc24548/mc33916	5
BP	GO:0005987	sucrose catabolic process	6/1994	14/16975	0.00338613	0.0309485	0.0244905	mc01110/mc16318/mc18077/mc20512/mc33732/mc34643	6
BP	GO:0035148	tube formation	6/1994	14/16975	0.00338613	0.0309485	0.0244905	mc02254/mc12729/mc22076/mc24962/mc27193/mc27961	6
BP	GO:0043280	positive regulation of cysteine-type endopeptidase activity involved in apoptotic process	6/1994	14/16975	0.00338613	0.0309485	0.0244905	mc13585/mc20064/mc23090/mc25920/mc26864/mc33338	6
BP	GO:0051785	positive regulation of nuclear division	6/1994	14/16975	0.00338613	0.0309485	0.0244905	mc09231/mc12949/mc22303/mc24790/mc29370/mc30627	6
BP	GO:1902402	signal transduction involved in mitotic DNA damage checkpoint	6/1994	14/16975	0.00338613	0.0309485	0.0244905	mc04004/mc08330/mc12555/mc25268/mc26177/mc32787	6
BP	GO:1902403	signal transduction involved in mitotic DNA integrity checkpoint	6/1994	14/16975	0.00338613	0.0309485	0.0244905	mc04004/mc08330/mc12555/mc25268/mc26177/mc32787	6
BP	GO:2001056	positive regulation of cysteine-type endopeptidase activity	6/1994	14/16975	0.00338613	0.0309485	0.0244905	mc13585/mc20064/mc23090/mc25920/mc26864/mc33338	6
BP	GO:0031346	positive regulation of cell projection organization	8/1994	23/16975	0.00344156	0.0311684	0.0246646	mc02254/mc12078/mc12729/mc16870/mc22076/mc24962/mc27451/mc39764	8
BP	GO:0048506	regulation of timing of meristematic phase transition	20/1994	90/16975	0.00344686	0.0311684	0.0246646	mc01110/mc02434/mc03351/mc04200/mc06565/mc06684/mc08530/mc09206/mc09438/mc14306/mc14465/mc14977/mc15083/mc17075/mc24335/mc25392/mc30612/mc33732/mc34643/mc40438	20
BP	GO:0048510	regulation of timing of transition from vegetative to reproductive phase	20/1994	90/16975	0.00344686	0.0311684	0.0246646	mc01110/mc02434/mc03351/mc04200/mc06565/mc06684/mc08530/mc09206/mc09438/mc14306/mc14465/mc14977/mc15083/mc17075/mc24335/mc25392/mc30612/mc33732/mc34643/mc40438	20
BP	GO:0007164	establishment of tissue polarity	10/1994	33/16975	0.00353232	0.0318283	0.0251868	mc05678/mc06682/mc12296/mc14464/mc14978/mc16663/mc27193/mc27961/mc32571/mc39280	10
BP	GO:0044773	mitotic DNA damage checkpoint	9/1994	28/16975	0.00358512	0.0320774	0.0253838	mc04004/mc08330/mc12555/mc13585/mc23090/mc25268/mc26177/mc26864/mc32787	9
BP	GO:0046620	regulation of organ growth	9/1994	28/16975	0.00358512	0.0320774	0.0253838	mc02061/mc05999/mc06422/mc09107/mc14149/mc15217/mc22345/mc29293/mc30532	9
BP	GO:0008361	regulation of cell size	14/1994	55/16975	0.00373519	0.0333033	0.0263539	mc01223/mc01563/mc02221/mc02722/mc12078/mc16870/mc22124/mc24122/mc24930/mc27451/mc33841/mc34707/mc38253/mc39764	14
BP	GO:0043085	positive regulation of catalytic activity	54/1994	320/16975	0.00383013	0.0340307	0.0269296	mc00155/mc00280/mc00428/mc01394/mc02254/mc04188/mc04286/mc04599/mc05272/mc05611/mc07414/mc07720/mc09365/mc09850/mc10370/mc10718/mc12729/mc13143/mc13233/mc13585/mc16319/mc16349/mc17400/mc18029/mc19034/mc19673/mc20064/mc20540/mc22076/mc22623/mc22698/mc23090/mc23591/mc23960/mc24590/mc24962/mc25387/mc25468/mc25920/mc26864/mc27673/mc28462/mc28924/mc29832/mc30038/mc30213/mc33338/mc34016/mc34119/mc36140…	54
BP	GO:2000060	positive regulation of ubiquitin-dependent protein catabolic process	12/1994	44/16975	0.00384427	0.0340378	0.0269352	mc10952/mc12949/mc13636/mc16345/mc18788/mc22303/mc23125/mc23887/mc24790/mc26884/mc36150/mc38501	12
BP	GO:0006914	autophagy	24/1994	116/16975	0.00390426	0.0343306	0.0271668	mc04079/mc06716/mc08250/mc11985/mc12348/mc12587/mc13636/mc14514/mc14953/mc16063/mc16979/mc23125/mc23960/mc26139/mc26418/mc26496/mc26884/mc27316/mc29832/mc30038/mc33048/mc38418/mc39623/mc40254	24
BP	GO:0061919	process utilizing autophagic mechanism	24/1994	116/16975	0.00390426	0.0343306	0.0271668	mc04079/mc06716/mc08250/mc11985/mc12348/mc12587/mc13636/mc14514/mc14953/mc16063/mc16979/mc23125/mc23960/mc26139/mc26418/mc26496/mc26884/mc27316/mc29832/mc30038/mc33048/mc38418/mc39623/mc40254	24
BP	GO:0010051	xylem and phloem pattern formation	26/1994	129/16975	0.00398038	0.0348797	0.0276014	mc01192/mc01727/mc02120/mc02402/mc03877/mc04286/mc05435/mc05724/mc07414/mc11386/mc12236/mc12889/mc16956/mc17565/mc21529/mc22243/mc24826/mc24835/mc25468/mc26557/mc27350/mc33801/mc34681/mc34897/mc39656/mc40411	26
BP	GO:0120031	plasma membrane bounded cell projection assembly	17/1994	73/16975	0.00405696	0.0353968	0.0280106	mc02233/mc02254/mc03212/mc12178/mc12700/mc12729/mc12759/mc16663/mc16764/mc22043/mc22076/mc24962/mc27146/mc27193/mc27961/mc39280/mc39946	17
BP	GO:0040034	regulation of development, heterochronic	23/1994	110/16975	0.00406716	0.0353968	0.0280106	mc01110/mc02434/mc03351/mc04200/mc06565/mc06684/mc08530/mc09206/mc09438/mc14306/mc14465/mc14977/mc15083/mc16708/mc17075/mc24335/mc25392/mc27663/mc30612/mc33732/mc34643/mc39347/mc40438	23
BP	GO:0030838	positive regulation of actin filament polymerization	11/1994	39/16975	0.00419286	0.0362123	0.0286559	mc00522/mc00667/mc02433/mc08523/mc21547/mc24338/mc25020/mc32644/mc34246/mc35273/mc40435	11
BP	GO:0071902	positive regulation of protein serine/threonine kinase activity	13/1994	50/16975	0.00420346	0.0362123	0.0286559	mc00428/mc01394/mc04599/mc07720/mc09365/mc16349/mc18029/mc20540/mc28462/mc28924/mc34016/mc34119/mc36140	13
BP	GO:1901991	negative regulation of mitotic cell cycle phase transition	13/1994	50/16975	0.00420346	0.0362123	0.0286559	mc04004/mc08330/mc12555/mc13585/mc13781/mc14657/mc23090/mc23327/mc25268/mc26177/mc26864/mc32174/mc32787	13
BP	GO:0009723	response to ethylene	57/1994	343/16975	0.00424873	0.0362984	0.028724	mc00488/mc00507/mc00647/mc01975/mc03367/mc03399/mc03552/mc03569/mc06136/mc06201/mc06684/mc06974/mc07094/mc07617/mc09206/mc09304/mc09647/mc09662/mc10681/mc11617/mc11847/mc12064/mc12174/mc12296/mc12469/mc13031/mc13866/mc13982/mc14465/mc14623/mc14977/mc16096/mc16767/mc17169/mc17360/mc17378/mc19716/mc21782/mc22466/mc25002/mc26286/mc26540/mc27055/mc27436/mc27582/mc28021/mc28854/mc30612/mc32571/mc32673…	57
BP	GO:0010977	negative regulation of neuron projection development	7/1994	19/16975	0.00427039	0.0362984	0.028724	mc12078/mc13198/mc16870/mc22536/mc24519/mc27451/mc39764	7
BP	GO:0031345	negative regulation of cell projection organization	7/1994	19/16975	0.00427039	0.0362984	0.028724	mc12078/mc13198/mc16870/mc22536/mc24519/mc27451/mc39764	7
BP	GO:0045665	negative regulation of neuron differentiation	7/1994	19/16975	0.00427039	0.0362984	0.028724	mc12078/mc13198/mc16870/mc22536/mc24519/mc27451/mc39764	7
BP	GO:0034330	cell junction organization	14/1994	56/16975	0.00445272	0.0377223	0.0298509	mc00474/mc00607/mc01500/mc02254/mc12729/mc16025/mc20064/mc22076/mc24962/mc25920/mc32517/mc33338/mc33942/mc35189	14
BP	GO:0061564	axon development	10/1994	34/16975	0.00448612	0.0378795	0.0299752	mc05751/mc06634/mc12078/mc13198/mc14415/mc16870/mc22536/mc24519/mc27451/mc39764	10
BP	GO:0031348	negative regulation of defense response	19/1994	86/16975	0.00459574	0.0381944	0.0302244	mc04714/mc06226/mc06908/mc07817/mc07927/mc12296/mc12444/mc16345/mc19752/mc20064/mc23505/mc25920/mc30762/mc30868/mc32571/mc32932/mc33338/mc36150/mc39005	19
BP	GO:0071900	regulation of protein serine/threonine kinase activity	19/1994	86/16975	0.00459574	0.0381944	0.0302244	mc00428/mc01394/mc04599/mc07720/mc09107/mc09365/mc09790/mc11200/mc16349/mc18029/mc18984/mc20540/mc28462/mc28924/mc29293/mc30532/mc34016/mc34119/mc36140	19
BP	GO:0010449	root meristem growth	15/1994	62/16975	0.00460858	0.0381944	0.0302244	mc00428/mc01394/mc04394/mc07508/mc12354/mc15937/mc20141/mc21685/mc24415/mc25998/mc33039/mc33256/mc34016/mc34119/mc38042	15
BP	GO:0002263	cell activation involved in immune response	8/1994	24/16975	0.00463814	0.0381944	0.0302244	mc06226/mc06908/mc22622/mc23960/mc24591/mc29832/mc30038/mc38418	8
BP	GO:0002366	leukocyte activation involved in immune response	8/1994	24/16975	0.00463814	0.0381944	0.0302244	mc06226/mc06908/mc22622/mc23960/mc24591/mc29832/mc30038/mc38418	8
BP	GO:2000114	regulation of establishment of cell polarity	8/1994	24/16975	0.00463814	0.0381944	0.0302244	mc02254/mc06516/mc12729/mc14245/mc15134/mc22076/mc24962/mc34323	8
BP	GO:0008608	attachment of spindle microtubules to kinetochore	9/1994	29/16975	0.00466502	0.0381944	0.0302244	mc05249/mc05638/mc10724/mc13781/mc23327/mc23596/mc30234/mc32174/mc38897	9
BP	GO:0090480	purine nucleotide-sugar transmembrane transport	9/1994	29/16975	0.00466502	0.0381944	0.0302244	mc02192/mc05614/mc07089/mc12807/mc13979/mc14634/mc22160/mc29686/mc30214	9
BP	GO:0010090	trichome morphogenesis	27/1994	137/16975	0.00466511	0.0381944	0.0302244	mc00794/mc01223/mc01563/mc01816/mc02739/mc04079/mc04101/mc07376/mc08225/mc08250/mc09221/mc10724/mc21547/mc23596/mc25433/mc25964/mc29366/mc30623/mc32644/mc33841/mc34417/mc34707/mc35040/mc38262/mc38897/mc40254/mc40278	27
BP	GO:1901000	regulation of response to salt stress	16/1994	68/16975	0.0046872	0.0381944	0.0302244	mc01953/mc02001/mc05049/mc08114/mc08874/mc13063/mc16096/mc17010/mc22430/mc22491/mc26540/mc27282/mc29022/mc32673/mc38283/mc39586	16
BP	GO:0010223	secondary shoot formation	17/1994	74/16975	0.00470315	0.0381944	0.0302244	mc00968/mc01713/mc04394/mc04714/mc07508/mc07817/mc12236/mc15937/mc20141/mc21529/mc24415/mc25998/mc26557/mc30868/mc33256/mc34549/mc38042	17
BP	GO:0010346	shoot axis formation	17/1994	74/16975	0.00470315	0.0381944	0.0302244	mc00968/mc01713/mc04394/mc04714/mc07508/mc07817/mc12236/mc15937/mc20141/mc21529/mc24415/mc25998/mc26557/mc30868/mc33256/mc34549/mc38042	17
BP	GO:0002283	neutrophil activation involved in immune response	6/1994	15/16975	0.00508793	0.0404182	0.0319842	mc22622/mc23960/mc24591/mc29832/mc30038/mc38418	6
BP	GO:0002444	myeloid leukocyte mediated immunity	6/1994	15/16975	0.00508793	0.0404182	0.0319842	mc22622/mc23960/mc24591/mc29832/mc30038/mc38418	6
BP	GO:0002446	neutrophil mediated immunity	6/1994	15/16975	0.00508793	0.0404182	0.0319842	mc22622/mc23960/mc24591/mc29832/mc30038/mc38418	6
BP	GO:0007231	osmosensory signaling pathway	6/1994	15/16975	0.00508793	0.0404182	0.0319842	mc01475/mc01652/mc04728/mc07833/mc29603/mc34808	6
BP	GO:0042119	neutrophil activation	6/1994	15/16975	0.00508793	0.0404182	0.0319842	mc22622/mc23960/mc24591/mc29832/mc30038/mc38418	6
BP	GO:0043299	leukocyte degranulation	6/1994	15/16975	0.00508793	0.0404182	0.0319842	mc22622/mc23960/mc24591/mc29832/mc30038/mc38418	6
BP	GO:0043312	neutrophil degranulation	6/1994	15/16975	0.00508793	0.0404182	0.0319842	mc22622/mc23960/mc24591/mc29832/mc30038/mc38418	6
BP	GO:0031175	neuron projection development	15/1994	63/16975	0.00540615	0.0428127	0.033879	mc02233/mc05751/mc06634/mc12078/mc12759/mc13198/mc14415/mc16870/mc16993/mc22536/mc24519/mc27294/mc27451/mc39597/mc39764	15
BP	GO:0080135	regulation of cellular response to stress	24/1994	119/16975	0.00546875	0.0431744	0.0341652	mc04188/mc10593/mc12064/mc13198/mc13636/mc15825/mc15874/mc19752/mc19804/mc20022/mc20077/mc22536/mc23125/mc23505/mc24519/mc25387/mc25885/mc26884/mc27436/mc33315/mc33388/mc39005/mc39063/mc39744	24
BP	GO:0002694	regulation of leukocyte activation	5/1994	11/16975	0.00558069	0.0437869	0.03465	mc06226/mc06908/mc20064/mc25920/mc33338	5
BP	GO:0072089	stem cell proliferation	5/1994	11/16975	0.00558069	0.0437869	0.03465	mc05678/mc06682/mc14464/mc14657/mc14978	5
BP	GO:0030837	negative regulation of actin filament polymerization	12/1994	46/16975	0.00568365	0.0441869	0.0349665	mc06516/mc06754/mc07240/mc10888/mc12700/mc14245/mc14908/mc15134/mc22043/mc23813/mc25020/mc27146	12
BP	GO:0032272	negative regulation of protein polymerization	12/1994	46/16975	0.00568365	0.0441869	0.0349665	mc06516/mc06754/mc07240/mc10888/mc12700/mc14245/mc14908/mc15134/mc22043/mc23813/mc25020/mc27146	12
BP	GO:0050000	chromosome localization	12/1994	46/16975	0.00568365	0.0441869	0.0349665	mc03791/mc05249/mc05638/mc09880/mc10724/mc11290/mc12351/mc23596/mc26414/mc30234/mc33043/mc38897	12
BP	GO:0000160	phosphorelay signal transduction system	35/1994	193/16975	0.00582887	0.0451781	0.0357509	mc00488/mc01975/mc03399/mc03569/mc04394/mc06684/mc07508/mc07617/mc09206/mc09662/mc12174/mc12296/mc13031/mc14465/mc14977/mc15937/mc16767/mc17169/mc17378/mc20141/mc20151/mc22466/mc24415/mc25998/mc26008/mc27582/mc28854/mc30612/mc32571/mc33246/mc33256/mc34212/mc35217/mc38042/mc39943	35
BP	GO:0002478	antigen processing and presentation of exogenous peptide antigen	7/1994	20/16975	0.00591255	0.0452763	0.0358286	mc02059/mc05249/mc05638/mc12979/mc22350/mc24762/mc30234	7
BP	GO:0019884	antigen processing and presentation of exogenous antigen	7/1994	20/16975	0.00591255	0.0452763	0.0358286	mc02059/mc05249/mc05638/mc12979/mc22350/mc24762/mc30234	7
BP	GO:0019886	antigen processing and presentation of exogenous peptide antigen via MHC class II	7/1994	20/16975	0.00591255	0.0452763	0.0358286	mc02059/mc05249/mc05638/mc12979/mc22350/mc24762/mc30234	7
BP	GO:0050768	negative regulation of neurogenesis	7/1994	20/16975	0.00591255	0.0452763	0.0358286	mc12078/mc13198/mc16870/mc22536/mc24519/mc27451/mc39764	7
BP	GO:0010065	primary meristem tissue development	9/1994	30/16975	0.00598163	0.0455318	0.0360308	mc12397/mc12572/mc16956/mc21717/mc26156/mc27350/mc32759/mc32992/mc39656	9
BP	GO:0042770	signal transduction in response to DNA damage	9/1994	30/16975	0.00598163	0.0455318	0.0360308	mc04004/mc08330/mc12555/mc13585/mc23090/mc25268/mc26177/mc26864/mc32787	9
BP	GO:0045664	regulation of neuron differentiation	13/1994	52/16975	0.00602107	0.04556	0.0360531	mc03749/mc09847/mc11239/mc12078/mc13198/mc16870/mc16993/mc22536/mc24519/mc27294/mc27451/mc39597/mc39764	13
BP	GO:0051983	regulation of chromosome segregation	13/1994	52/16975	0.00602107	0.04556	0.0360531	mc05249/mc05638/mc10724/mc12949/mc13781/mc14657/mc22303/mc23327/mc23596/mc24790/mc30234/mc32174/mc38897	13
BP	GO:0051656	establishment of organelle localization	34/1994	187/16975	0.00624771	0.0470007	0.0371931	mc01905/mc02706/mc03791/mc04326/mc05249/mc05638/mc06211/mc06289/mc06939/mc08808/mc09880/mc09950/mc10724/mc10791/mc11290/mc12088/mc12351/mc16854/mc19477/mc19644/mc23596/mc23628/mc23694/mc24141/mc24362/mc26414/mc27477/mc30234/mc33043/mc34326/mc35111/mc36762/mc38740/mc38897	34
BP	GO:0001763	morphogenesis of a branching structure	17/1994	76/16975	0.00624833	0.0470007	0.0371931	mc00968/mc01713/mc04394/mc04714/mc07508/mc07817/mc12236/mc15937/mc20141/mc21529/mc24415/mc25998/mc26557/mc30868/mc33256/mc34549/mc38042	17
BP	GO:1901800	positive regulation of proteasomal protein catabolic process	15/1994	64/16975	0.0063116	0.047163	0.0373215	mc09308/mc10952/mc12949/mc13636/mc16345/mc18788/mc22303/mc23125/mc23887/mc24790/mc26884/mc28549/mc31388/mc36150/mc38501	15
BP	GO:1903052	positive regulation of proteolysis involved in cellular protein catabolic process	15/1994	64/16975	0.0063116	0.047163	0.0373215	mc09308/mc10952/mc12949/mc13636/mc16345/mc18788/mc22303/mc23125/mc23887/mc24790/mc26884/mc28549/mc31388/mc36150/mc38501	15
BP	GO:0032273	positive regulation of protein polymerization	11/1994	41/16975	0.00634388	0.047163	0.0373215	mc00522/mc00667/mc02433/mc08523/mc21547/mc24338/mc25020/mc32644/mc34246/mc35273/mc40435	11
BP	GO:0072583	clathrin-dependent endocytosis	11/1994	41/16975	0.00634388	0.047163	0.0373215	mc01981/mc02682/mc05384/mc05514/mc13025/mc16084/mc17490/mc24158/mc24681/mc26522/mc38221	11
BP	GO:0051259	protein complex oligomerization	25/1994	127/16975	0.00641053	0.0475199	0.037604	mc00360/mc00602/mc02233/mc03749/mc03791/mc04079/mc04326/mc05236/mc08250/mc09847/mc09880/mc10338/mc11239/mc11290/mc12575/mc12587/mc12759/mc24362/mc26139/mc26154/mc27642/mc30252/mc31479/mc32755/mc40254	25
BP	GO:0045488	pectin metabolic process	20/1994	95/16975	0.00654018	0.0483404	0.0382533	mc01033/mc01511/mc03323/mc06713/mc09243/mc09294/mc12377/mc13189/mc14511/mc19559/mc21701/mc22577/mc24548/mc26391/mc28639/mc31417/mc33021/mc33916/mc34593/mc34828	20
CC	GO:0034399	nuclear periphery	23/1976	78/16891	1.83101e-05	0.00659704	0.00528053	mc00254/mc02053/mc02059/mc04089/mc04247/mc06516/mc07378/mc08235/mc12351/mc12979/mc13152/mc14245/mc15134/mc22350/mc22374/mc24578/mc24756/mc24762/mc25436/mc26414/mc33043/mc40266/mc40274	23
CC	GO:0030136	clathrin-coated vesicle	17/1976	52/16891	5.24746e-05	0.00659704	0.00528053	mc03212/mc04286/mc04326/mc05272/mc05384/mc05514/mc05611/mc07414/mc15806/mc16084/mc17490/mc20002/mc24362/mc25468/mc26522/mc30213/mc33429	17
CC	GO:0099513	polymeric cytoskeletal fiber	43/1976	202/16891	6.60901e-05	0.00659704	0.00528053	mc02059/mc02254/mc03877/mc05249/mc05435/mc05638/mc09178/mc09433/mc09805/mc10724/mc11386/mc12440/mc12729/mc12979/mc13781/mc14715/mc15427/mc15693/mc15779/mc16663/mc17068/mc17565/mc19001/mc19865/mc21757/mc22076/mc22350/mc22940/mc23327/mc23596/mc24762/mc24962/mc25704/mc25806/mc26739/mc30234/mc30589/mc32174/mc32941/mc33468/mc33579/mc38897/mc39280	43
CC	GO:0000139	Golgi membrane	48/1976	234/16891	6.87192e-05	0.00659704	0.00528053	mc00143/mc01001/mc02229/mc03323/mc04791/mc06151/mc06516/mc07068/mc08344/mc09294/mc09697/mc10488/mc11513/mc12766/mc13198/mc13249/mc13967/mc13973/mc14245/mc14652/mc14660/mc15134/mc15460/mc15504/mc16564/mc18404/mc18468/mc18615/mc20900/mc21951/mc22118/mc22536/mc22721/mc23674/mc24006/mc24519/mc25260/mc27085/mc27837/mc29557/mc29760/mc30109/mc30818/mc31417/mc34566/mc38360/mc38762/mc40180	48
CC	GO:0016363	nuclear matrix	14/1976	40/16891	0.000103364	0.00660646	0.00528807	mc02053/mc02059/mc04089/mc06516/mc08235/mc12979/mc14245/mc15134/mc22350/mc22374/mc24756/mc24762/mc40266/mc40274	14
CC	GO:0032432	actin filament bundle	9/1976	19/16891	0.000123984	0.00660646	0.00528807	mc06754/mc07240/mc12440/mc14908/mc15779/mc21757/mc25806/mc32941/mc33468	9
CC	GO:0031011	Ino80 complex	7/1976	12/16891	0.000137635	0.00660646	0.00528807	mc03541/mc04089/mc08235/mc11631/mc17343/mc40266/mc40274	7
CC	GO:0033202	DNA helicase complex	7/1976	12/16891	0.000137635	0.00660646	0.00528807	mc03541/mc04089/mc08235/mc11631/mc17343/mc40266/mc40274	7
CC	GO:0005769	early endosome	27/1976	112/16891	0.000176738	0.00744601	0.00596007	mc01001/mc02233/mc04791/mc05384/mc05514/mc06516/mc10034/mc12759/mc14245/mc15134/mc15820/mc16084/mc17490/mc17739/mc20014/mc20448/mc21153/mc25278/mc25868/mc26522/mc29557/mc30818/mc33400/mc34566/mc35763/mc37035/mc40205	27
CC	GO:0099081	supramolecular polymer	46/1976	232/16891	0.000220487	0.00744601	0.00596007	mc02059/mc02254/mc03877/mc05249/mc05435/mc05638/mc09178/mc09433/mc09805/mc10724/mc11386/mc12440/mc12700/mc12729/mc12979/mc13781/mc14715/mc15427/mc15693/mc15779/mc16663/mc17068/mc17565/mc19001/mc19865/mc21757/mc22043/mc22076/mc22350/mc22940/mc23327/mc23596/mc24762/mc24962/mc25704/mc25806/mc26739/mc27146/mc30234/mc30589/mc32174/mc32941/mc33468/mc33579/mc38897/mc39280	46
CC	GO:0099512	supramolecular fiber	46/1976	232/16891	0.000220487	0.00744601	0.00596007	mc02059/mc02254/mc03877/mc05249/mc05435/mc05638/mc09178/mc09433/mc09805/mc10724/mc11386/mc12440/mc12700/mc12729/mc12979/mc13781/mc14715/mc15427/mc15693/mc15779/mc16663/mc17068/mc17565/mc19001/mc19865/mc21757/mc22043/mc22076/mc22350/mc22940/mc23327/mc23596/mc24762/mc24962/mc25704/mc25806/mc26739/mc27146/mc30234/mc30589/mc32174/mc32941/mc33468/mc33579/mc38897/mc39280	46
CC	GO:0005844	polysome	37/1976	176/16891	0.000268177	0.00744601	0.00596007	mc00280/mc04085/mc04729/mc07835/mc08239/mc08925/mc10228/mc10810/mc12487/mc12528/mc13143/mc13585/mc16076/mc19531/mc19918/mc20279/mc21473/mc21841/mc22623/mc23090/mc24590/mc25324/mc25772/mc26216/mc26263/mc26512/mc26864/mc29090/mc29601/mc30368/mc30852/mc32831/mc32884/mc36269/mc38712/mc40262/mc40515	37
CC	GO:0005628	prospore membrane	6/1976	10/16891	0.000351335	0.00744601	0.00596007	mc07787/mc13559/mc23064/mc26836/mc29636/mc30894	6
CC	GO:0005766	primary lysosome	6/1976	10/16891	0.000351335	0.00744601	0.00596007	mc22622/mc23960/mc24591/mc29832/mc30038/mc38418	6
CC	GO:0042582	azurophil granule	6/1976	10/16891	0.000351335	0.00744601	0.00596007	mc22622/mc23960/mc24591/mc29832/mc30038/mc38418	6
CC	GO:0042763	intracellular immature spore	6/1976	10/16891	0.000351335	0.00744601	0.00596007	mc07787/mc13559/mc23064/mc26836/mc29636/mc30894	6
CC	GO:0042764	ascospore-type prospore	6/1976	10/16891	0.000351335	0.00744601	0.00596007	mc07787/mc13559/mc23064/mc26836/mc29636/mc30894	6
CC	GO:0043202	lysosomal lumen	6/1976	10/16891	0.000351335	0.00744601	0.00596007	mc22622/mc23960/mc24591/mc29832/mc30038/mc38418	6
CC	GO:0042788	polysomal ribosome	30/1976	135/16891	0.000368422	0.00744601	0.00596007	mc00280/mc04085/mc08239/mc10228/mc10810/mc12487/mc12528/mc13143/mc13585/mc16076/mc19531/mc19918/mc20279/mc21473/mc21841/mc22623/mc23090/mc24590/mc25324/mc25772/mc26216/mc26263/mc26512/mc26864/mc32831/mc32884/mc36269/mc38712/mc40262/mc40515	30
CC	GO:0030173	integral component of Golgi membrane	10/1976	27/16891	0.000602032	0.0110086	0.00881169	mc08344/mc10488/mc16564/mc24006/mc25260/mc27837/mc29760/mc30109/mc38360/mc40180	10
CC	GO:0031228	intrinsic component of Golgi membrane	10/1976	27/16891	0.000602032	0.0110086	0.00881169	mc08344/mc10488/mc16564/mc24006/mc25260/mc27837/mc29760/mc30109/mc38360/mc40180	10
CC	GO:0030874	nucleolar chromatin	6/1976	11/16891	0.000696362	0.0121547	0.00972907	mc01223/mc01563/mc03976/mc33841/mc34707/mc40162	6
CC	GO:0005849	mRNA cleavage factor complex	12/1976	38/16891	0.00092712	0.0154789	0.0123899	mc00476/mc00612/mc05233/mc16152/mc17010/mc19626/mc20362/mc27282/mc30258/mc34203/mc35192/mc39586	12
CC	GO:0030135	coated vesicle	21/1976	88/16891	0.00102167	0.0163467	0.0130845	mc03212/mc04286/mc04326/mc04897/mc05272/mc05384/mc05514/mc05611/mc07414/mc07960/mc15806/mc16084/mc17490/mc20002/mc24362/mc25468/mc26522/mc29473/mc30213/mc30730/mc33429	21
CC	GO:0034045	phagophore assembly site membrane	6/1976	12/16891	0.00125509	0.0184841	0.0147954	mc06716/mc12348/mc14514/mc14953/mc26418/mc33048	6
CC	GO:0030496	midbody	7/1976	16/16891	0.00129966	0.0184841	0.0147954	mc02059/mc04599/mc07720/mc12979/mc22350/mc24762/mc28924	7
CC	GO:0089701	U2AF complex	7/1976	16/16891	0.00129966	0.0184841	0.0147954	mc00849/mc01867/mc07756/mc29653/mc30917/mc34367/mc35082	7
CC	GO:0031306	intrinsic component of mitochondrial outer membrane	9/1976	25/16891	0.00142626	0.0188857	0.0151168	mc06249/mc06887/mc12273/mc14789/mc15367/mc21579/mc26606/mc29829/mc38423	9
CC	GO:0031307	integral component of mitochondrial outer membrane	9/1976	25/16891	0.00142626	0.0188857	0.0151168	mc06249/mc06887/mc12273/mc14789/mc15367/mc21579/mc26606/mc29829/mc38423	9
CC	GO:0005884	actin filament	10/1976	30/16891	0.0015433	0.0197542	0.015812	mc12440/mc15693/mc15779/mc19865/mc21757/mc25704/mc25806/mc32941/mc33468/mc33579	10
CC	GO:1904949	ATPase complex	16/1976	63/16891	0.0019702	0.0244051	0.0195348	mc00474/mc00607/mc03541/mc04079/mc04089/mc08235/mc08250/mc11631/mc16318/mc17343/mc18077/mc20512/mc35189/mc40254/mc40266/mc40274	16
CC	GO:0031965	nuclear membrane	19/1976	81/16891	0.0021494	0.0250795	0.0200746	mc01963/mc02053/mc03569/mc03904/mc04247/mc05470/mc07378/mc09662/mc11412/mc12351/mc13051/mc17378/mc22374/mc22474/mc24662/mc24756/mc25436/mc26414/mc33043	19
CC	GO:0048471	perinuclear region of cytoplasm	20/1976	87/16891	0.00215527	0.0250795	0.0200746	mc02711/mc03749/mc04509/mc04599/mc06226/mc06516/mc06908/mc07635/mc07720/mc08816/mc09847/mc11239/mc13636/mc14245/mc15134/mc23125/mc24138/mc26884/mc28866/mc28924	20
CC	GO:0005874	microtubule	33/1976	172/16891	0.00279128	0.0315251	0.0252339	mc02059/mc02254/mc03877/mc05249/mc05435/mc05638/mc09178/mc09433/mc09805/mc10724/mc11386/mc12729/mc12979/mc13781/mc14715/mc15427/mc16663/mc17068/mc17565/mc19001/mc22076/mc22350/mc22940/mc23327/mc23596/mc24762/mc24962/mc26739/mc30234/mc30589/mc32174/mc38897/mc39280	33
CC	GO:0032592	integral component of mitochondrial membrane	14/1976	54/16891	0.00299793	0.0328916	0.0263277	mc02422/mc06249/mc06589/mc06887/mc12273/mc14346/mc14789/mc15060/mc15367/mc21579/mc24346/mc26606/mc29829/mc38423	14
CC	GO:0005811	lipid droplet	10/1976	33/16891	0.00342701	0.0355668	0.0284691	mc04791/mc06217/mc06923/mc07603/mc13243/mc22713/mc24498/mc29557/mc30818/mc31040	10
CC	GO:0009531	secondary cell wall	10/1976	33/16891	0.00342701	0.0355668	0.0284691	mc01500/mc10601/mc10724/mc16025/mc19800/mc23596/mc32517/mc33942/mc38897/mc39057	10
CC	GO:0098573	intrinsic component of mitochondrial membrane	14/1976	56/16891	0.00428989	0.0433504	0.0346994	mc02422/mc06249/mc06589/mc06887/mc12273/mc14346/mc14789/mc15060/mc15367/mc21579/mc24346/mc26606/mc29829/mc38423	14
CC	GO:0000782	telomere cap complex	6/1976	15/16891	0.00498391	0.0445075	0.0356255	mc03569/mc04033/mc08300/mc09662/mc17378/mc40212	6
CC	GO:0000783	nuclear telomere cap complex	6/1976	15/16891	0.00498391	0.0445075	0.0356255	mc03569/mc04033/mc08300/mc09662/mc17378/mc40212	6
CC	GO:0005775	vacuolar lumen	6/1976	15/16891	0.00498391	0.0445075	0.0356255	mc22622/mc23960/mc24591/mc29832/mc30038/mc38418	6
CC	GO:0035371	microtubule plus-end	6/1976	15/16891	0.00498391	0.0445075	0.0356255	mc05249/mc05638/mc10724/mc23596/mc30234/mc38897	6
CC	GO:0140445	chromosome, telomeric repeat region	6/1976	15/16891	0.00498391	0.0445075	0.0356255	mc03569/mc04033/mc08300/mc09662/mc17378/mc40212	6
MF	GO:0008092	cytoskeletal protein binding	76/1773	369/14722	1.53035e-06	0.000896785	0.000761953	mc00522/mc00667/mc00732/mc00794/mc01780/mc01816/mc02009/mc02254/mc02433/mc03877/mc04599/mc05060/mc05249/mc05435/mc05638/mc06136/mc06516/mc06754/mc07094/mc07240/mc07720/mc08523/mc09178/mc09805/mc10616/mc10724/mc10791/mc10888/mc11386/mc12351/mc12440/mc12700/mc12729/mc13734/mc13982/mc14245/mc14623/mc14715/mc14908/mc15134/mc15427/mc15779/mc17565/mc19001/mc21757/mc22043/mc22076/mc22426/mc23596/mc23694…	76
MF	GO:0046982	protein heterodimerization activity	25/1773	86/14722	1.74428e-05	0.00511074	0.00434234	mc01096/mc01618/mc01936/mc02196/mc05412/mc09697/mc10806/mc11359/mc11513/mc13079/mc16116/mc17592/mc17635/mc18010/mc20324/mc20558/mc22157/mc22508/mc23709/mc24640/mc24900/mc25164/mc33716/mc34632/mc38723	25
MF	GO:0005543	phospholipid binding	39/1773	168/14722	3.56339e-05	0.00616308	0.00523646	mc01482/mc01648/mc03749/mc04286/mc05272/mc05611/mc06198/mc06984/mc07414/mc09697/mc09847/mc09850/mc10370/mc10655/mc11239/mc11513/mc12348/mc14744/mc15418/mc15730/mc16227/mc17718/mc19034/mc19748/mc19899/mc23509/mc23960/mc25468/mc26418/mc27673/mc29832/mc30038/mc30213/mc33048/mc33523/mc34323/mc38418/mc39004/mc39313	39
MF	GO:0004888	transmembrane signaling receptor activity	66/1773	338/14722	4.34911e-05	0.00616308	0.00523646	mc00824/mc00835/mc01836/mc01847/mc04255/mc04779/mc04947/mc06266/mc06865/mc07274/mc07385/mc08015/mc09440/mc09605/mc10308/mc11876/mc12047/mc12139/mc12397/mc12473/mc13867/mc14754/mc14814/mc15354/mc15409/mc16276/mc16349/mc16745/mc16839/mc16902/mc17077/mc17304/mc17766/mc18029/mc18602/mc20540/mc21717/mc23012/mc23228/mc23407/mc23658/mc23918/mc25444/mc26807/mc26948/mc27057/mc27410/mc27496/mc27534/mc27612…	66
MF	GO:0003779	actin binding	32/1773	130/14722	5.2586e-05	0.00616308	0.00523646	mc00522/mc00667/mc02009/mc02433/mc05060/mc06754/mc07240/mc08523/mc10616/mc10791/mc12440/mc12700/mc14908/mc15779/mc21757/mc22043/mc22426/mc23694/mc24338/mc24706/mc25020/mc25806/mc27146/mc29034/mc30320/mc32941/mc33468/mc34246/mc35273/mc38740/mc39050/mc40435	32
MF	GO:0004675	transmembrane receptor protein serine/threonine kinase activity	57/1773	285/14722	7.14763e-05	0.00698085	0.00593128	mc00824/mc00835/mc01836/mc01847/mc04255/mc04947/mc06266/mc06865/mc07274/mc07385/mc08015/mc09605/mc10308/mc12047/mc12139/mc12397/mc13867/mc14754/mc14814/mc15354/mc15409/mc16276/mc16349/mc16745/mc16839/mc16902/mc17304/mc17766/mc18029/mc18602/mc20540/mc21717/mc23228/mc23407/mc23658/mc23918/mc25444/mc26948/mc27057/mc27410/mc27496/mc27534/mc27612/mc28682/mc29428/mc29961/mc32107/mc32992/mc35062/mc35069…	57
MF	GO:0001664	G protein-coupled receptor binding	10/1773	22/14722	0.000102522	0.00727574	0.00618183	mc04625/mc05678/mc06682/mc14464/mc14978/mc23960/mc29832/mc30038/mc30930/mc38418	10
MF	GO:0051082	unfolded protein binding	22/1773	79/14722	0.000111115	0.00727574	0.00618183	mc02164/mc02212/mc03430/mc03502/mc07373/mc09597/mc11756/mc12787/mc12843/mc16138/mc17218/mc17300/mc18579/mc20064/mc20349/mc22139/mc24869/mc24917/mc25432/mc25920/mc33338/mc40358	22
MF	GO:0004683	calmodulin-dependent protein kinase activity	21/1773	74/14722	0.000117628	0.00727574	0.00618183	mc00732/mc01780/mc04714/mc07817/mc15674/mc17911/mc19854/mc19911/mc20147/mc20659/mc23942/mc25682/mc25761/mc26005/mc29999/mc30868/mc33250/mc33713/mc34631/mc34954/mc38440	21
MF	GO:1901682	sulfur compound transmembrane transporter activity	16/1773	49/14722	0.000124159	0.00727574	0.00618183	mc01005/mc01464/mc01660/mc01691/mc08344/mc10488/mc11998/mc16564/mc22734/mc25260/mc27343/mc27837/mc34570/mc34817/mc39648/mc40180	16
MF	GO:0004707	MAP kinase activity	12/1773	31/14722	0.000139586	0.00743615	0.00631812	mc00375/mc00586/mc00774/mc01809/mc05445/mc11397/mc12064/mc17553/mc27436/mc34182/mc35171/mc39744	12
MF	GO:0060089	molecular transducer activity	79/1773	444/14722	0.000215753	0.00992302	0.00843109	mc00824/mc00835/mc01836/mc01847/mc04255/mc04394/mc04779/mc04947/mc06266/mc06865/mc07274/mc07385/mc07508/mc08015/mc09440/mc09605/mc10308/mc11876/mc12047/mc12139/mc12397/mc12473/mc13867/mc14754/mc14814/mc15354/mc15409/mc15937/mc16276/mc16349/mc16745/mc16839/mc16902/mc17077/mc17304/mc17766/mc18029/mc18602/mc20141/mc20151/mc20540/mc21675/mc21717/mc23012/mc23228/mc23407/mc23658/mc23918/mc24415/mc25444…	79
MF	GO:0019199	transmembrane receptor protein kinase activity	57/1773	298/14722	0.000246974	0.00992302	0.00843109	mc00824/mc00835/mc01836/mc01847/mc04255/mc04947/mc06266/mc06865/mc07274/mc07385/mc08015/mc09605/mc10308/mc12047/mc12139/mc12397/mc13867/mc14754/mc14814/mc15354/mc15409/mc16276/mc16349/mc16745/mc16839/mc16902/mc17304/mc17766/mc18029/mc18602/mc20540/mc21717/mc23228/mc23407/mc23658/mc23918/mc25444/mc26948/mc27057/mc27410/mc27496/mc27534/mc27612/mc28682/mc29428/mc29961/mc32107/mc32992/mc35062/mc35069…	57
MF	GO:0015116	sulfate transmembrane transporter activity	9/1773	20/14722	0.000252457	0.00992302	0.00843109	mc01005/mc01464/mc01660/mc01691/mc11998/mc27343/mc34570/mc34817/mc39648	9
MF	GO:0042162	telomeric DNA binding	14/1773	42/14722	0.00025493	0.00992302	0.00843109	mc02419/mc03429/mc03569/mc04033/mc06074/mc08300/mc09304/mc09662/mc11765/mc15285/mc17203/mc17378/mc24347/mc40212	14
MF	GO:0000295	adenine nucleotide transmembrane transporter activity	13/1773	38/14722	0.000315009	0.00992302	0.00843109	mc00090/mc04916/mc07970/mc08344/mc10488/mc13310/mc16564/mc20037/mc25260/mc27837/mc29460/mc33374/mc40180	13
MF	GO:0005346	purine ribonucleotide transmembrane transporter activity	13/1773	38/14722	0.000315009	0.00992302	0.00843109	mc00090/mc04916/mc07970/mc08344/mc10488/mc13310/mc16564/mc20037/mc25260/mc27837/mc29460/mc33374/mc40180	13
MF	GO:0015216	purine nucleotide transmembrane transporter activity	13/1773	38/14722	0.000315009	0.00992302	0.00843109	mc00090/mc04916/mc07970/mc08344/mc10488/mc13310/mc16564/mc20037/mc25260/mc27837/mc29460/mc33374/mc40180	13
MF	GO:0016653	oxidoreductase activity, acting on NAD(P)H, heme protein as acceptor	7/1773	13/14722	0.000321736	0.00992302	0.00843109	mc06745/mc07231/mc14551/mc14917/mc20117/mc25973/mc33276	7
MF	GO:0019209	kinase activator activity	8/1773	17/14722	0.000387059	0.0100729	0.00855841	mc00280/mc10718/mc13143/mc19673/mc22623/mc23591/mc24590/mc38900	8
MF	GO:0030295	protein kinase activator activity	8/1773	17/14722	0.000387059	0.0100729	0.00855841	mc00280/mc10718/mc13143/mc19673/mc22623/mc23591/mc24590/mc38900	8
MF	GO:0009931	calcium-dependent protein serine/threonine kinase activity	18/1773	64/14722	0.000398456	0.0100729	0.00855841	mc04714/mc07817/mc15674/mc17911/mc19854/mc19911/mc20147/mc20659/mc23942/mc25682/mc25761/mc26005/mc29999/mc30868/mc33250/mc33713/mc34631/mc38440	18
MF	GO:0010857	calcium-dependent protein kinase activity	18/1773	64/14722	0.000398456	0.0100729	0.00855841	mc04714/mc07817/mc15674/mc17911/mc19854/mc19911/mc20147/mc20659/mc23942/mc25682/mc25761/mc26005/mc29999/mc30868/mc33250/mc33713/mc34631/mc38440	18
MF	GO:0043028	cysteine-type endopeptidase regulator activity involved in apoptotic process	6/1773	10/14722	0.000412541	0.0100729	0.00855841	mc12575/mc13585/mc23090/mc26154/mc26864/mc32755	6
MF	GO:0051015	actin filament binding	24/1773	99/14722	0.000550968	0.0128168	0.0108898	mc02009/mc02433/mc06754/mc07240/mc08523/mc10616/mc10791/mc12440/mc12700/mc14908/mc15779/mc21757/mc22043/mc22426/mc23694/mc24338/mc24706/mc25806/mc27146/mc32941/mc33468/mc38740/mc39050/mc40435	24
MF	GO:0038023	signaling receptor activity	68/1773	382/14722	0.000568662	0.0128168	0.0108898	mc00824/mc00835/mc01836/mc01847/mc04255/mc04779/mc04947/mc06266/mc06865/mc07274/mc07385/mc08015/mc09440/mc09605/mc10308/mc11876/mc12047/mc12139/mc12397/mc12473/mc13867/mc14754/mc14814/mc15354/mc15409/mc16276/mc16349/mc16745/mc16839/mc16902/mc17077/mc17304/mc17766/mc18029/mc18602/mc20540/mc21675/mc21717/mc23012/mc23228/mc23407/mc23658/mc23918/mc25444/mc26807/mc26948/mc27057/mc27410/mc27496/mc27534…	68
MF	GO:0044390	ubiquitin-like protein conjugating enzyme binding	14/1773	46/14722	0.000727319	0.0157855	0.0134122	mc02061/mc05999/mc06422/mc10263/mc10952/mc14149/mc15217/mc18788/mc19558/mc21448/mc22345/mc23887/mc35654/mc38501	14
MF	GO:0008134	transcription factor binding	41/1773	206/14722	0.000772409	0.0159212	0.0135275	mc00474/mc00607/mc02010/mc02254/mc02739/mc04030/mc04699/mc07387/mc07802/mc08305/mc08376/mc09308/mc10880/mc12729/mc15507/mc16318/mc16345/mc16583/mc18077/mc18399/mc20064/mc20512/mc20884/mc22076/mc22425/mc24962/mc25237/mc25920/mc27854/mc28549/mc29628/mc30885/mc31388/mc33338/mc35189/mc36150/mc36545/mc38262/mc39141/mc40157/mc40209	41
MF	GO:0008526	phosphatidylinositol transfer activity	6/1773	11/14722	0.00081508	0.0159212	0.0135275	mc07787/mc13559/mc23064/mc26836/mc29636/mc30894	6
MF	GO:0120014	phospholipid transfer activity	6/1773	11/14722	0.00081508	0.0159212	0.0135275	mc07787/mc13559/mc23064/mc26836/mc29636/mc30894	6
MF	GO:0003691	double-stranded telomeric DNA binding	9/1773	23/14722	0.000876956	0.0165773	0.0140849	mc03569/mc04033/mc06074/mc08300/mc09304/mc09662/mc15285/mc17378/mc40212	9
MF	GO:0015215	nucleotide transmembrane transporter activity	13/1773	42/14722	0.000935641	0.0171339	0.0145578	mc00090/mc04916/mc07970/mc08344/mc10488/mc13310/mc16564/mc20037/mc25260/mc27837/mc29460/mc33374/mc40180	13
MF	GO:0031624	ubiquitin conjugating enzyme binding	10/1773	28/14722	0.00105353	0.0187043	0.0158921	mc02061/mc05999/mc06422/mc10952/mc14149/mc15217/mc18788/mc22345/mc23887/mc38501	10
MF	GO:0019900	kinase binding	35/1773	171/14722	0.00108523	0.0187043	0.0158921	mc00428/mc00476/mc00612/mc01394/mc01475/mc01652/mc04599/mc06716/mc07720/mc09440/mc11876/mc12487/mc13636/mc14514/mc14657/mc14953/mc17077/mc18387/mc20064/mc20875/mc23125/mc25920/mc26263/mc26884/mc28924/mc29829/mc32884/mc33338/mc34016/mc34119/mc34203/mc34808/mc35192/mc36539/mc38423	35
MF	GO:0008289	lipid binding	45/1773	236/14722	0.00112875	0.0188985	0.0160571	mc01482/mc01648/mc03749/mc04286/mc05272/mc05611/mc06198/mc06984/mc07414/mc09697/mc09847/mc09850/mc10370/mc10655/mc11239/mc11513/mc12340/mc12348/mc14744/mc15418/mc15730/mc16227/mc17718/mc19034/mc19748/mc19899/mc21665/mc23100/mc23509/mc23960/mc25468/mc26418/mc26439/mc26873/mc27673/mc29832/mc30038/mc30213/mc33048/mc33076/mc33523/mc34323/mc38418/mc39004/mc39313	45
MF	GO:0001216	DNA-binding transcription activator activity	22/1773	93/14722	0.00130037	0.0205951	0.0174986	mc02010/mc02269/mc04030/mc04699/mc07802/mc08305/mc08496/mc12711/mc15507/mc18399/mc19648/mc20884/mc22056/mc22425/mc23623/mc25481/mc27149/mc29628/mc30885/mc36545/mc38860/mc40209	22
MF	GO:0001228	DNA-binding transcription activator activity, RNA polymerase II-specific	22/1773	93/14722	0.00130037	0.0205951	0.0174986	mc02010/mc02269/mc04030/mc04699/mc07802/mc08305/mc08496/mc12711/mc15507/mc18399/mc19648/mc20884/mc22056/mc22425/mc23623/mc25481/mc27149/mc29628/mc30885/mc36545/mc38860/mc40209	22
MF	GO:0003690	double-stranded DNA binding	61/1773	347/14722	0.00145797	0.0220039	0.0186956	mc00104/mc00474/mc00607/mc02010/mc02269/mc03569/mc04030/mc04033/mc04699/mc05249/mc05638/mc05784/mc06074/mc06137/mc06656/mc07092/mc07617/mc07802/mc08300/mc08305/mc08376/mc09304/mc09662/mc10650/mc10681/mc12711/mc13288/mc13981/mc15285/mc15507/mc16318/mc17378/mc18077/mc18399/mc18446/mc19716/mc20512/mc20884/mc20933/mc22056/mc22425/mc22759/mc23504/mc23716/mc25237/mc27149/mc28854/mc29628/mc30234/mc30507…	61
MF	GO:0016847	1-aminocyclopropane-1-carboxylate synthase activity	6/1773	12/14722	0.00146443	0.0220039	0.0186956	mc05807/mc06575/mc09293/mc14323/mc15072/mc28576	6
MF	GO:0030628	pre-mRNA 3'-splice site binding	7/1773	16/14722	0.00154495	0.0226335	0.0192305	mc00849/mc01867/mc07756/mc29653/mc30917/mc34367/mc35082	7
MF	GO:1990837	sequence-specific double-stranded DNA binding	46/1773	249/14722	0.00195686	0.0279688	0.0237637	mc00104/mc02010/mc02269/mc04030/mc04699/mc05249/mc05638/mc05784/mc06656/mc07617/mc07802/mc08305/mc08376/mc10650/mc10681/mc12711/mc13288/mc15507/mc16318/mc18077/mc18399/mc18446/mc19716/mc20512/mc20884/mc20933/mc22056/mc22425/mc22759/mc23504/mc23716/mc25237/mc27149/mc28854/mc29628/mc30234/mc30507/mc30885/mc36545/mc36596/mc38715/mc38964/mc39006/mc40157/mc40209/mc40512	46
MF	GO:0001085	RNA polymerase II transcription factor binding	19/1773	79/14722	0.00220273	0.0307333	0.0261126	mc00474/mc00607/mc02010/mc04030/mc04699/mc07802/mc08305/mc15507/mc16318/mc18077/mc18399/mc20512/mc20884/mc22425/mc29628/mc30885/mc35189/mc36545/mc40209	19
MF	GO:0033549	MAP kinase phosphatase activity	6/1773	13/14722	0.00244388	0.0318247	0.0270398	mc09107/mc09790/mc11200/mc18984/mc29293/mc30532	6
MF	GO:0051861	glycolipid binding	6/1773	13/14722	0.00244388	0.0318247	0.0270398	mc23100/mc23960/mc26873/mc29832/mc30038/mc38418	6
MF	GO:0120013	lipid transfer activity	6/1773	13/14722	0.00244388	0.0318247	0.0270398	mc07787/mc13559/mc23064/mc26836/mc29636/mc30894	6
MF	GO:0140297	DNA-binding transcription factor binding	26/1773	124/14722	0.00317091	0.0403946	0.0343213	mc00474/mc00607/mc02010/mc02254/mc04030/mc04699/mc07802/mc08305/mc12729/mc15507/mc16318/mc18077/mc18399/mc20064/mc20512/mc20884/mc22076/mc22425/mc24962/mc25920/mc29628/mc30885/mc33338/mc35189/mc36545/mc40209	26
MF	GO:0030695	GTPase regulator activity	30/1773	151/14722	0.00377677	0.045055	0.0382809	mc04178/mc04286/mc04625/mc05272/mc05611/mc06516/mc07414/mc10230/mc10370/mc10601/mc12078/mc14245/mc15134/mc16870/mc19800/mc20064/mc23145/mc25384/mc25468/mc25920/mc26896/mc27451/mc27673/mc30213/mc30930/mc33338/mc36264/mc39057/mc39313/mc39764	30
MF	GO:0000822	inositol hexakisphosphate binding	6/1773	14/14722	0.00384428	0.045055	0.0382809	mc00100/mc13296/mc21675/mc22775/mc24464/mc33062	6
MF	GO:0008515	sucrose transmembrane transporter activity	6/1773	14/14722	0.00384428	0.045055	0.0382809	mc01708/mc18615/mc23674/mc34555/mc34878/mc38762	6
MF	GO:0070567	cytidylyltransferase activity	6/1773	14/14722	0.00384428	0.045055	0.0382809	mc12273/mc21579/mc23992/mc26606/mc30091/mc38371	6
